# Supplementary material
Source: ML conference proceedings conference paper supplement (https://openreview.net/forum?id=rO6UExXrFzz)
Supplement: supplementary_material [file attachment]

---

# Benefits of Additive Noise in Composing Classes with Bounded Capacity

---

Anonymous Author(s)

Affiliation

Address

email

## Abstract

1 We observe that given two (compatible) classes of functions  $\mathcal{F}$  and  $\mathcal{H}$  with small  
2 capacity as measured by their uniform covering numbers, the capacity of the  
3 composition class  $\mathcal{H} \circ \mathcal{F}$  can become prohibitively large or even unbounded. We  
4 then show that adding a small amount of Gaussian noise to the output of  $\mathcal{F}$  before  
5 composing it with  $\mathcal{H}$  can effectively control the capacity of  $\mathcal{H} \circ \mathcal{F}$ , offering a  
6 general recipe for modular design. To prove our results, we define new notions of  
7 uniform covering number of random functions with respect to the total variation  
8 and Wasserstein distances. We instantiate our results for the case of multi-layer  
9 neural networks. Preliminary empirical results indicate that the amount of noise  
10 required for our bound to improve over existing uniform bounds can be quite low.

## 11 1 Introduction

12 Let  $\mathcal{F}$  be a class of functions from  $\mathcal{X}$  to  $\mathcal{Y}$ , and  $\mathcal{H}$  a class of functions from  $\mathcal{Y}$  to  $\mathcal{Z}$ . Assuming  
13 that  $\mathcal{F}$  and  $\mathcal{H}$  have bounded “capacity”, can we bound the capacity of their composition, i.e.,  
14  $\mathcal{H} \circ \mathcal{F} = \{h \circ f \mid f \in \mathcal{F}, h \in \mathcal{H}\}$ ? Here, by capacity we mean learning-theoretic quantities such  
15 as VC dimension, fat-shattering dimension, and (uniform) covering numbers associated with these  
16 classes (see Vapnik (1999); Anthony et al. (1999); Shalev-Shwartz and Ben-David (2014); Mohri et al.  
17 (2018) for an introduction). Being able to control the capacity of composition of function classes  
18 is useful, as it offers a modular approach to design sophisticated classes (and therefore learning  
19 algorithms) out of simpler ones. To be concrete, we want to know if the uniform covering number  
20 (as defined in the next section) of  $\mathcal{H} \circ \mathcal{F}$  can be “effectively” bounded as a function of the uniform  
21 covering numbers of  $\mathcal{F}$  and  $\mathcal{H}$ .

22 The answer to the above questions is true when  $\mathcal{F}$  is a set of binary valued functions (i.e.,  $\mathcal{Y} = \{0, 1\}$   
23 in the above). More generally, the capacity of the composition class (as measured by the uniform  
24 covering number) can be bounded as long as  $|\mathcal{Y}|$  is relatively small (see Proposition 7). But what if  $\mathcal{Y}$   
25 is an infinite set, such as the natural case of  $\mathcal{Y} = [0, 1]$ ? Unfortunately, in this case the capacity of  
26  $\mathcal{H} \circ \mathcal{F}$  (as measured by the covering number) can become unbounded (or excessively large) even  
27 when both  $\mathcal{F}$  and  $\mathcal{H}$  have bounded (or small) capacities; see Propositions 8 and 9.

28 Given the above observation, we ask whether there is a general and systematic way to control the  
29 capacity of the composition of bounded-capacity classes. More specifically, we are interested in  
30 the case where the domain sets are multi-dimensional real-valued vectors (e.g.,  $\mathcal{X} \subset \mathbb{R}^d$ ,  $\mathcal{Y} \subset \mathbb{R}^p$ ,  
31  $\mathcal{Z} \subset \mathbb{R}^q$ ). The canonical examples of such classes are those associated with neural networks.

32 A common approach to control the capacity of  $\mathcal{H} \circ \mathcal{F}$  is assuming that  $\mathcal{H}$  and  $\mathcal{F}$  have bounded  
33 capacity and  $\mathcal{H}$  consists of Lipschitz functions (with respect to appropriate metrics). Then the  
34 capacity of  $\mathcal{H} \circ \mathcal{F}$  can be bounded as long as  $\mathcal{H}$  has a small “global cover” (see Remark 13). This  
35 observation has been used to bound the capacity of neural networks in terms of the magnitude of

36 their weights (Bartlett, 1996). More generally, the capacity of neural networks that admit Lipschitz  
 37 continuity can be bounded based on their group norms and spectral norms (Neyshabur et al., 2015;  
 38 Bartlett et al., 2017; Golowich et al., 2018). One benefit of this approach is that the composition of  
 39 Lipschitz classes is still Lipschitz (although with a larger Lipschitz constant).

40 While building classes of functions from composition of Lipschitz classes is useful, it does not  
 41 necessarily work as a general recipe. In fact, some commonly used classes of functions do not admit  
 42 a small Lipschitz constant. Consider the class of single-layer neural networks defined over bounded  
 43 input domain  $[-B, B]^d$  and with the sigmoid activation function. While the sigmoid activation  
 44 function itself is Lipschitz, the Lipschitz constant of the network depends on the magnitude of the  
 45 weights. Indeed, we empirically observe that this can turn Lipschitzness-based bounds on the covering  
 46 number of neural networks worse than classic VC-based bounds.

47 Another limitation of using Lipschitz classes is that they cannot be easily “mixed and matched” with  
 48 other (bounded-capacity) classes. For example, suppose  $\mathcal{F}$  is a class of  $L$ -Lipschitz functions (e.g.,  
 49 multi-layer sigmoid neural networks with many weights but small magnitudes). Also, assume  $\mathcal{H}$   
 50 is a non-Lipschitz class with bounded uniform covering number (e.g., one layer sigmoid neural  
 51 network with unbounded weights). Then although both  $\mathcal{F}$  and  $\mathcal{H}$  have bounded capacity,  $\mathcal{H} \circ \mathcal{F}$  is  
 52 not Lipschitz and its capacity cannot be generally controlled.

53 We take a different approach for composing classes of functions. A key observation that we make  
 54 and utilize is that adding a little bit of noise while “gluing” two classes can help in controlling the  
 55 capacity of their composition. In order to prove such results, we define and study uniform covering  
 56 numbers of random functions with respect to total variation and Wasserstein metrics. The bounds for  
 57 composition then come naturally through the use of data processing inequality for the total variation  
 58 distance metric.

## 59 Contributions and Organization.

- 60 • Section 3 provides the necessary notations and includes the observations that composing  
 61 real-valued functions can be more challenging than binary valued functions (Propositions 7, 8,  
 62 and 9).
- 63 • In Section 4, we define a new notion of covering number for random functions (Definition 10)  
 64 with respect to total variation (TV) and Wasserstein distances.
- 65 • The bulk of our technical results appear in Section 5. These include a composition result  
 66 for random classes with respect to the TV distance (Lemma 18) that is based on the  
 67 data processing inequality. We also show how one can translate TV covering numbers to  
 68 conventional  $\|\cdot\|_2$  counterparts (Theorem 17) and vice versa (Corollary 21). A useful tool is  
 69 Theorem 20 which exploits kernel density estimation techniques to translate Wasserstein  
 70 covers to TV covers when we add Gaussian noise to the output of functions.
- 71 • Section 6 provides a stronger type of covering number for classes of single-layer noisy  
 72 neural networks with the sigmoid activation function (Theorem 25).
- 73 • In Section 7, we use the tools developed in the previous sections and prove a novel bound  
 74 on the  $\|\cdot\|_2$  covering number of noisy deep neural networks (Theorem 26).
- 75 • In Section 8 we define NVAC, a metric for comparing generalization bounds (Definition 28)  
 76 based on the number of samples required to make the bound non-vacuous.
- 77 • We offer some preliminary experiments, comparing various generalization bounds in Sec-  
 78 tion 9. We observe that even a negligible amount of Gaussian noise can improve NVAC over  
 79 other approaches without affecting the accuracy of the model on train or test data.

## 80 2 Related work

81 Adding various types of noise have been empirically shown to be beneficial in training neural  
 82 networks. In dropout noise (Srivastava et al., 2014) (and its variants such as DropConnect (Wan et al.,  
 83 2013)) the output of some of the activation functions (or weights) are randomly set to zero. These  
 84 approaches are thought to act as a regularizer. Another example is Denoising AutoEncoders (Vincent  
 85 et al., 2008) which adds noise to the input of the network while training stacked autoencoders.

86 There has been efforts on studying the theory behind the effects of noise in neural networks. Jim et al.  
 87 (1996) study the effects of different types of additive and multiplicative noise on convergence speed

and generalization of recurrent neural networks (RNN) and suggest that noise can help to speed up the convergence on local minima surfaces. Lim et al. (2021) formalize the regularization effects of noise in RNNs and show that noisy RNNs are more stable and robust to input perturbations. Wang et al. (2019) and Gao and Zhou (2016) analyze the networks with dropout noise and find bounds on Rademacher complexities that are dependent on the product of norms and dropout probability. It is noteworthy that our techniques and results are quite different, and require a negligible amount of additive noise to work, while existing bounds for dropout improve over conventional bounds only if the amount of noise is substantial. Studying dropout noise with the tools developed in this paper is a direction for future research.

Studying PAC learning and its sample complexity is by now a mature field; see Vapnik (1999); Shalev-Shwartz and Ben-David (2014); Mohri et al. (2018). In the case of neural networks, standard Vapnik-Chervonenkis-based complexity bounds have been established (Baum and Haussler, 1988; Maass, 1994; Goldberg and Jerrum, 1995; Vidyasagar, 1997; Sontag et al., 1998; Koiran and Sontag, 1998; Bartlett et al., 1998; Bartlett and Maass, 2003; Bartlett et al., 2019). These offer generalization bounds that depend on the number of parameters of the neural network. There is also another line of work that aims to prove a generalization bound that mainly depends on the norms of the weights and Lipschitz continuity properties of the network rather than the number of parameters (Bartlett, 1996; Anthony et al., 1999; Zhang, 2002; Bartlett, 1996; Neyshabur et al., 2015; Bartlett et al., 2017; Neyshabur et al., 2018; Golowich et al., 2018; Arora et al., 2018; Nagarajan and Kolter, 2018; Long and Sedghi, 2020). We provide a more detailed discussion of some of these results in Appendix H. Finally, we refer the reader to Anthony et al. (1999) for an introductory discussion on this subject.

The above-mentioned bounds are usually vacuous for commonly used data sets and architectures. Dziugaite and Roy (2017) (and later Zhou et al. (2019)) show how to achieve a non-vacuous bound using the PAC Bayesian framework. These approaches as well as compression-based methods (Arora et al., 2018) are, however, examples of “two-step” methods; see Appendix H for more details. It has been argued that uniform convergence theory may not fully explain the performance of neural networks (Zhang et al., 2021; Nagarajan and Kolter, 2019). One conjecture is that implicit bias of gradient descent (Gunasekar et al., 2017; Arora et al., 2019; Ji et al., 2020; Chizat and Bach, 2020; Ji and Telgarsky, 2021) can lead to benign overfitting (Belkin et al., 2018, 2019; Bartlett et al., 2020); see Bartlett et al. (2021) for a recent overview.

### 3 Notations and background

**Notation.**  $\mathcal{X} \subseteq \mathbb{R}^d$  and  $\mathcal{Y} \subseteq \mathbb{R}^p$  denote two (domain) sets. For  $x \in \mathcal{X}$ , let  $\|x\|_1$ ,  $\|x\|_2$ , and  $\|x\|_\infty$  denote the  $\ell_1$ ,  $\ell_2$ , and  $\ell_\infty$  norm of the vector  $x$ , respectively. We denote the cardinality of a set  $S$  by  $|S|$ . The set of natural numbers smaller or equal to  $m$  are denoted by  $[m]$ . A hypothesis is a Borel function  $f : \mathbb{R}^d \rightarrow \mathbb{R}^p$ , and a hypothesis class  $\mathcal{F}$  is a set of hypotheses.

We also define the random counterparts of the above definitions and use an overline to distinguish them from the non-random versions.  $\overline{\mathcal{X}}$  denotes the set of all absolutely continuous random variables defined over  $\mathcal{X}$ . We sometimes abuse the notation and write  $\overline{x} \in \overline{\mathcal{X}}$  rather than  $\overline{x} \in \overline{\mathcal{X}}$  (e.g.,  $\overline{x} \in \mathbb{R}^d$  is a random variable taking values in  $\mathbb{R}^d$ ). By  $\overline{y} = f(\overline{x})$  we denote a random variable that is the result of mapping  $\overline{x}$  using a Borel function  $f : \mathbb{R}^d \rightarrow \mathbb{R}^p$ . We use  $\overline{f} : \mathbb{R}^d \rightarrow \mathbb{R}^p$  to indicate that the mapping itself can be random. We use  $\overline{\mathcal{F}}$  to signal that the class can include random hypotheses. We conflate the notation for random hypotheses so that they can be applied to both random and non-random inputs (e.g.,  $\overline{f}(\overline{x})$  and  $\overline{f}(x)$ ).<sup>1</sup>

**Definition 1** (Composition of two hypothesis classes). *We denote by  $h \circ f$  the function  $h(f(x))$  (assuming the range of  $f$  and the domain of  $h$  are compatible). The composition of two hypothesis classes  $\mathcal{F}$  and  $\mathcal{H}$  is defined by  $\mathcal{H} \circ \mathcal{F} = \{h \circ f \mid h \in \mathcal{H}, f \in \mathcal{F}\}$ . Composition of classes of random hypotheses is defined similarly by  $\overline{\mathcal{H}} \circ \overline{\mathcal{F}} = \{\overline{h} \circ \overline{f} \mid \overline{h} \in \overline{\mathcal{H}}, \overline{f} \in \overline{\mathcal{F}}\}$ .*

The following singleton class  $\overline{\mathcal{G}}_\sigma$  will be used to create noisy functions (e.g., using  $\overline{\mathcal{G}}_\sigma \circ \mathcal{F}$ ).

**Definition 2** (The Gaussian Noise Class). *The  $d$ -dimensional noise class with scale  $\sigma$  is denoted by  $\overline{\mathcal{G}}_{\sigma,d} = \{\overline{g}_{\sigma,d}\}$ . Here,  $\overline{g}_{\sigma,d} : \mathbb{R}^d \rightarrow \mathbb{R}^d$  is a random function defined by  $\overline{g}_{\sigma,d}(\overline{x}) = \overline{x} + \overline{z}$ , where  $\overline{z} \sim \mathcal{N}(\mathbf{0}, \sigma^2 I_d)$ . When it is clear from the context we drop  $d$  and write  $\overline{\mathcal{G}}_\sigma = \{\overline{g}_\sigma\}$ .*

<sup>1</sup>Technically, we consider  $\overline{f}(x)$  to be  $\overline{f}(\overline{\delta}_x)$ , where  $\overline{\delta}_x$  is a random variable with Dirac delta measure on  $x$ .

In the rest of this section, we define the standard notion of uniform covering numbers for hypothesis classes. Intuitively, classes with larger uniform covering numbers have more capacity/flexibility, and therefore require more samples to be learned.

**Definition 3** (Covering number). *Let  $(\mathcal{X}, \rho)$  be a metric space. We say that a set  $A \subset \mathcal{X}$  is  $\epsilon$ -covered by a set  $C \subseteq A$  with respect to  $\rho$ , if for all  $a \in A$  there exists  $c \in C$  such that  $\rho(a, c) \leq \epsilon$ . The cardinality of the smallest set  $C$  that  $\epsilon$ -covers  $A$  is denoted by  $N(\epsilon, A, \rho)$  and it is referred to as the  $\epsilon$ -covering number of  $A$  with respect to metric  $\rho$ .*

**Definition 4** (Extended metrics). *Let  $(\mathcal{X}, \rho)$  be a metric space. Let  $u = (a_1, \dots, a_m), v = (b_1, \dots, b_m) \in \mathcal{X}^m$  for  $m \in \mathbb{N}$ . The  $\infty$ -extended and  $\ell_2$ -extended metrics over  $\mathcal{X}^m$  are defined by  $\rho^{\infty, m}(u, v) = \sup_{1 \leq i \leq m} \rho(a_i, b_i)$  and  $\rho^{\ell_2, m}(u, v) = \sqrt{\frac{1}{m} \sum_{i=1}^m (\rho(a_i, b_i))^2}$ , respectively. We drop  $m$  and use  $\rho^\infty$  or  $\rho^{\ell_2}$  if it is clear from the context.*

**Remark 5.** *The extended metrics are used in Definition 6 and capture the distance of two hypotheses on an input sample of size  $m$ . A typical example of  $\rho$  is the Euclidean distance over  $\mathbb{R}^p$ , for which the extended metrics are denoted by  $\|\cdot\|_2^{\infty, m}$  and  $\|\cdot\|_2^{\ell_2, m}$ . Unlike  $\infty$ -extended metric, the  $\ell_2$ -extended metric is normalized by  $1/\sqrt{m}$ , and therefore we have  $\rho^{\ell_2, m}(u, v) \leq \rho^{\infty, m}(u, v)$  for all  $u, v \in \mathcal{X}^m$ .*

**Definition 6** (Uniform covering number). *Let  $(\mathcal{Y}, \rho)$  be a metric space and  $\mathcal{F}$  a hypothesis class of functions from  $\mathcal{X}$  to  $\mathcal{Y}$ . For a set of inputs  $S = \{x_1, x_2, \dots, x_m\} \subseteq \mathcal{X}$ , we define the restriction of  $\mathcal{F}$  to  $S$  as  $\mathcal{F}_S = \{(f(x_1), f(x_2), \dots, f(x_m)) : f \in \mathcal{F}\} \subseteq \mathcal{Y}^m$ . The uniform  $\epsilon$ -covering numbers of hypothesis class  $\mathcal{F}$  with respect to metrics  $\rho^\infty, \rho^{\ell_2}$  are denoted by  $N_U(\epsilon, \mathcal{F}, m, \rho^\infty)$  and  $N_U(\epsilon, \mathcal{F}, m, \rho^{\ell_2})$  and are the maximum values of  $N(\epsilon, \mathcal{F}_S, \rho^{\infty, m})$  and  $N(\epsilon, \mathcal{F}_S, \rho^{\ell_2, m})$  over all  $S \subseteq \mathcal{X}$  with  $|S| = m$ , respectively.*

It is well-known that the Rademacher complexity and therefore the generalization gap of a class can be bounded based on logarithm of the uniform covering number. For sake of brevity, we defer those results to Appendix F. Therefore, our main object of interest is bounding (logarithm of) the uniform covering number. The following propositions show that there is a stark difference between classes of functions with finite range versus continuous valued functions when it comes to bounding the uniform covering number of composite classes; the proofs can be found in Appendix B.

**Proposition 7.** *Let  $\mathcal{Y}$  be a finite domain ( $|\mathcal{Y}| = k$ ) and  $\rho(y, \hat{y}) = 1\{y \neq \hat{y}\}$  be a metric over  $\mathcal{Y}$ . For any class  $\mathcal{F}$  of functions from  $\mathcal{X}$  to  $\mathcal{Y}$  and any class  $\mathcal{H}$  of functions from  $\mathcal{Y}$  to  $\mathbb{R}^d$  we have  $N_U(\epsilon, \mathcal{H} \circ \mathcal{F}, m, \|\cdot\|_2^\infty) \leq N_1 \cdot N_U(\epsilon, \mathcal{H}, mN_1, \|\cdot\|_2^\infty)$  where  $N_1 = N_U(0.5, \mathcal{F}, m, \rho^\infty)$ .*

**Proposition 8.** *Let  $\mathcal{F} = \{f_w(x) = wx \mid w \in (0, 1), x \in (0, 1)\}$  be a class of functions and  $\mathcal{H} = \{h(y) = 1/y \mid y \in (0, 1)\}$  be a singleton class. Then,  $N_U(\epsilon, \mathcal{F}, m, \|\cdot\|_2^{\ell_2}) \leq \lceil 2/\epsilon^2 \rceil$  and  $N_U(\epsilon, \mathcal{H}, m, \|\cdot\|_2^{\ell_2}) = 1$ , but  $N_U(\epsilon, \mathcal{H} \circ \mathcal{F}, m, \|\cdot\|_2^{\ell_2})$  is unbounded.*

**Proposition 9.** *For every  $\epsilon > \epsilon' > 0$ , there exist hypothesis classes  $\mathcal{F}$  and  $\mathcal{H}$  such that for every  $m$  we have  $N_U(\epsilon', \mathcal{H}, m, \|\cdot\|_2^\infty) \leq m + 1$  and  $N_U(\epsilon', \mathcal{F}, m, \|\cdot\|_2^\infty) = 1$ , yet  $N_U(\epsilon, \mathcal{H} \circ \mathcal{F}, m, \|\cdot\|_2^\infty) \geq 2^m$ .*

## 4 Covering random hypotheses

We want to establish the benefits of adding (a little bit of) noise when composing hypothesis classes. Therefore, we need to analyze classes of *random* hypotheses. One way to do this is to replace each hypothesis with its expectation, creating a deterministic version of the hypothesis class. Unfortunately, this approach misses the whole point of having noisy hypotheses (and their benefits in composition). Instead, we extend the definition of uniform covering numbers to classes of random hypotheses  $\overline{\mathcal{F}}$ . The following is basically the random counterpart of Definition 6.

**Definition 10** (Uniform covering number for classes of random hypotheses). *Let  $(\overline{\mathcal{Y}}, \rho)$  be a metric space and  $\overline{\mathcal{F}}$  a class of random hypotheses from  $\overline{\mathcal{X}}$  to  $\overline{\mathcal{Y}}$ . For a set of random variables  $\overline{S} = \{\overline{x}_1, \overline{x}_2, \dots, \overline{x}_m\} \subseteq \overline{\mathcal{X}}$ , we define the restriction of  $\overline{\mathcal{F}}$  to  $\overline{S}$  as  $\overline{\mathcal{F}}_{\overline{S}} = \{(\overline{f}(\overline{x}_1), \overline{f}(\overline{x}_2), \dots, \overline{f}(\overline{x}_m)) : \overline{f} \in \overline{\mathcal{F}}\} \subseteq \overline{\mathcal{Y}}^m$ . Let  $\Gamma \subseteq \overline{\mathcal{X}}$ . The uniform  $\epsilon$ -covering numbers of  $\overline{\mathcal{F}}$  with respect to  $\Gamma$  and metrics  $\rho^\infty$  and  $\rho^{\ell_2}$  are defined by*

$$N_U(\epsilon, \overline{\mathcal{F}}, m, \rho^\infty, \Gamma) = \sup_{S \subseteq \Gamma, |S|=m} N(\epsilon, \overline{\mathcal{F}}_{\overline{S}}, \rho^{\infty, m}),$$

$$N_U(\epsilon, \overline{\mathcal{F}}, m, \rho^{\ell_2}, \Gamma) = \sup_{S \subseteq \Gamma, |S|=m} N(\epsilon, \overline{\mathcal{F}}_{\overline{S}}, \rho^{\ell_2, m}).$$

186 **Remark 11.** Unlike in Definition 6 where  $\rho$  is usually the  $\|\cdot\|_2$  metric in the Euclidean space, here in  
 187 Definition 10  $\rho$  is defined over random variables. More specifically, we will use the Total Variation  
 188 and Wasserstein metrics as concrete choices for  $\rho$ .

189 **Remark 12.** The specific choices that we use for  $\Gamma$  are

- 190 •  $\Gamma = \overline{\mathcal{X}_d}$ : the set of all absolutely continuous random variables defined over  $\mathbb{R}^d$ .
- 191 •  $\Gamma = \overline{\mathcal{X}_{B,d}}$ : the set of all absolutely continuous random variables defined over  $[-B, B]^d$ .
- 192 •  $\Gamma = \overline{\Delta_d} = \{\overline{\delta_x} \mid x \in \mathbb{R}^d\}$  and  $\Gamma = \overline{\Delta_{B,d}} = \{\overline{\delta_x} \mid x \in [-B, B]^d\}$ , where  $\overline{\delta_x}$  is the random  
 193 variable associated with Dirac delta measure on  $x$ .
- 194 •  $\Gamma = \overline{\mathcal{G}_{\sigma,d} \circ \mathcal{X}_{B,d}} = \{\overline{g_{\sigma,d}(\overline{x})} \mid \overline{x} \in \overline{\mathcal{X}_{B,d}}\}$ : all members of  $\overline{\mathcal{X}_{B,d}}$  after being “smoothed” by  
 195 adding (convolving with) Gaussian noise.

196 **Remark 13.** Some hypothesis classes that we work with have “global” covers, in the sense that the  
 197 uniform covering number does not depend on  $m$ . We therefore use the following notation

$$N_U(\epsilon, \overline{\mathcal{F}}, \infty, \rho^\infty, \Gamma) = \lim_{m \rightarrow \infty} N_U(\epsilon, \overline{\mathcal{F}}, m, \rho^\infty, \Gamma).$$

198 We now define Total Variation (TV) and Wasserstein metrics over probability measures rather than  
 199 random variables, but with a slight abuse of notation we will use them for random variables too.

200 **Definition 14** (Total Variation Distance). Let  $\mu$  and  $\nu$  denote two probability measures over  $\mathcal{X}$  and  
 201 let  $\Omega$  be the Borel sigma-algebra over  $\mathcal{X}$ . The TV distance between  $\mu$  and  $\nu$  is defined by

$$d_{TV}(\mu, \nu) = \sup_{B \in \Omega} |\mu(B) - \nu(B)|.$$

202 Furthermore, if  $\mu$  and  $\nu$  have densities  $f$  and  $g$  then

$$d_{TV}(\mu, \nu) = \sup_{B \in \Omega} \left| \int_B (f(x) - g(x)) dx \right| = \frac{1}{2} \int_{\mathcal{X}} |f(x) - g(x)| dx = \frac{1}{2} \|f - g\|_1.$$

203 **Definition 15** (Wasserstein Distance). Let  $\mu$  and  $\nu$  denote two probability measures over  $\mathcal{X}$ , and  
 204  $\Pi(\mu, \nu)$  be the set of all their couplings. The Wasserstein distance between  $\mu$  and  $\nu$  is defined by

$$d_W(\mu, \nu) = \left( \inf_{\pi \in \Pi(\mu, \nu)} \int_{\mathcal{X} \times \mathcal{X}} \|x - y\|_2 d\pi(x, y) \right).$$

205 The following proposition makes it explicit that the conventional uniform covering number with  
 206 respect to  $\|\cdot\|_2$  (Definition 6) can be regarded as a special case of Definition 10.

207 **Proposition 16.** Let  $\mathcal{F}$  be a class of (deterministic) hypotheses from  $\mathbb{R}^d$  to  $\mathbb{R}^p$ . Then

$$208 N_U(\epsilon, \mathcal{F}, m, \|\cdot\|_2^\infty) = N_U(\epsilon, \mathcal{F}, d_{\mathcal{W}}^\infty, m, \overline{\Delta_d}) \text{ and } N_U(\epsilon, \mathcal{F}, m, \|\cdot\|_2^{\ell_2}) = N_U(\epsilon, \mathcal{F}, d_{\mathcal{W}}^{\ell_2}, m, \overline{\Delta_d}).$$

209 The proposition is the direct consequence of the Definitions 6 and 10 once we note that the Wasserstein  
 210 distance between Dirac random variables is just their  $\ell_2$  distance, i.e.,  $d_W(\overline{\delta_x}, \overline{\delta_y}) = \|x - y\|_2$ .

## 211 5 Bounding the uniform covering number

212 This section provides tools that can be used in a general recipe for bounding the uniform covering  
 213 number. The ultimate goal is to bound the (conventional)  $\|\cdot\|_2^\infty$  and  $\|\cdot\|_2^{\ell_2}$  uniform covering numbers  
 214 for (noisy) compositions of hypothesis classes. In order to achieve this, we will show how one can  
 215 turn TV covers into  $\|\cdot\|_2$  covers (Theorem 17) and vice versa (Corollary 21). But what is the point of  
 216 going back and forth between  $\|\cdot\|_2$  and TV covers? Basically, the data processing inequality ensures  
 217 an effective composition (Lemma 18) for TV covers. Our analysis goes through a number of steps,  
 218 connecting covering numbers with respect to  $\|\cdot\|_2$ , Wasserstein, and TV distances. The missing  
 219 proofs of this section can be found in Appendix C.

220 The following theorem considers the deterministic class  $\mathcal{H}$  associated with expectations of random  
 221 hypotheses from  $\overline{\mathcal{F}}$ , and shows that bounding the uniform covering number of  $\mathcal{F}$  with respect to TV  
 222 distance is enough for bounding the uniform covering number of  $\mathcal{H}$  with respect to  $\|\cdot\|_2$  distance.

**Theorem 17** (From a TV cover to a  $\|\cdot\|_2$  cover). *Consider any class  $\overline{\mathcal{F}}$  of random hypotheses  $\overline{f} : \mathbb{R}^d \rightarrow [-B, B]^p$  with bounded output. Define the (nonrandom) hypothesis class  $\mathcal{H} = \{h : \mathbb{R}^d \rightarrow [-B, B]^p \mid h(x) = \mathbb{E}_{\overline{\mathcal{F}}} [\overline{f}(x)], \overline{f} \in \overline{\mathcal{F}}\}$ . Then for every  $\epsilon > 0$ ,  $m \in \mathbb{N}$  these two inequalities hold:*

$$N_U(2B\epsilon\sqrt{p}, \mathcal{H}, m, \|\cdot\|_2^\infty) \leq N_U(\epsilon, \overline{\mathcal{F}}, m, d_{TV}^\infty, \overline{\Delta_d}) \leq N_U(\epsilon, \overline{\mathcal{F}}, m, d_{TV}^\infty, \overline{\mathcal{X}_d}),$$

$$N_U(2B\epsilon\sqrt{p}, \mathcal{H}, m, \|\cdot\|_2^{\ell_2}) \leq N_U(\epsilon, \overline{\mathcal{F}}, m, d_{TV}^{\ell_2}, \overline{\Delta_d}) \leq N_U(\epsilon, \overline{\mathcal{F}}, m, d_{TV}^{\ell_2}, \overline{\mathcal{X}_d}).$$

But what is the point of working with the TV distance? An important ingredient of our analysis is the use of data processing inequality which holds for the TV distance (see Lemma 29). The following lemma uses this fact, and shows how one can compose classes with bounded TV covers.

**Lemma 18** (Composing classes with bounded TV covers). *Let  $\overline{\mathcal{F}}$  be a class of random hypotheses from  $\mathbb{R}^d$  to  $\mathbb{R}^p$ , and  $\overline{\mathcal{H}}$  be a class of random hypotheses from  $\mathbb{R}^p$  to  $\mathbb{R}^q$ . For every  $\epsilon, \epsilon' > 0$ , and every  $m \in \mathbb{N}$  these three inequalities hold:*

$$N_U(\epsilon + \epsilon', \overline{\mathcal{H}} \circ \overline{\mathcal{F}}, m, d_{TV}^\infty, \overline{\mathcal{X}_d}) \leq N_U(\epsilon', \overline{\mathcal{H}}, mN_1, d_{TV}^\infty, \overline{\mathcal{X}_p}) \cdot N_1,$$

$$N_U(\epsilon + \epsilon', \overline{\mathcal{H}} \circ \overline{\mathcal{F}}, m, d_{TV}^\infty, \overline{\Delta_d}) \leq N_U(\epsilon', \overline{\mathcal{H}}, mN_2, d_{TV}^\infty, \overline{\mathcal{X}_p}) \cdot N_2,$$

$$N_U(\epsilon + \epsilon', \overline{\mathcal{H}} \circ \overline{\mathcal{F}}, m, d_{TV}^{\ell_2}, \overline{\Delta_d}) \leq N_U(\epsilon', \overline{\mathcal{H}}, mN_3, d_{TV}^\infty, \overline{\mathcal{X}_p}) \cdot N_3,$$

where  $N_1 = N_U(\epsilon, \overline{\mathcal{F}}, m, d_{TV}^\infty, \overline{\mathcal{X}_d})$ ,  $N_2 = N_U(\epsilon, \overline{\mathcal{F}}, m, d_{TV}^\infty, \overline{\Delta_d})$  and  $N_3 = N_U(\epsilon, \overline{\mathcal{F}}, m, d_{TV}^{\ell_2}, \overline{\Delta_d})$ .

**Remark 19.** In Lemma 18, for  $\overline{\mathcal{H}}$ , we required the stronger notion of cover with respect to  $\overline{\mathcal{X}_d}$  (i.e., the input to the hypotheses can be any random variable with a density function), whereas for  $\overline{\mathcal{F}}$  a cover with respect to  $\overline{\Delta_d}$  sufficed in some cases. As we will see below, finding a cover with respect to  $\overline{\Delta_d}$  is easier since one can reuse conventional  $\|\cdot\|_2$  covers. However, finding covers with respect to  $\overline{\mathcal{X}_d}$  is more challenging. In the next section we show how to do this for a class of neural networks.

The next step is bounding the uniform covering number with respect to the TV distance (TV covering number for short). It will be useful to be able to bound TV covering number with Wasserstein covering number. However, this is generally impossible since closeness in Wasserstein distance does not imply closeness in TV distance. Yet, the following theorem establishes that one can bound the TV covering number as long as some Gaussian noise is added to the output of the hypotheses.

**Theorem 20** (From a Wasserstein cover to a TV cover). *Let  $\overline{\mathcal{F}}$  be a class of random hypotheses from  $\mathbb{R}^d$  to  $\mathbb{R}^p$ , and  $\overline{\mathcal{G}_{\sigma,p}}$  be a Gaussian noise class. Then for every  $\epsilon > 0$  and  $m \in \mathbb{N}$  we have*

$$N_U\left(\frac{9\epsilon}{2\sigma}, \overline{\mathcal{G}_{\sigma,p}} \circ \overline{\mathcal{F}}, m, d_{TV}^\infty, \overline{\mathcal{X}_d}\right) \leq N_U(\epsilon, \overline{\mathcal{F}}, m, d_W^\infty, \overline{\mathcal{X}_d}),$$

$$N_U\left(\frac{9\epsilon}{2\sigma}, \overline{\mathcal{G}_{\sigma,p}} \circ \overline{\mathcal{F}}, m, d_{TV}^\infty, \overline{\Delta_d}\right) \leq N_U(\epsilon, \overline{\mathcal{F}}, m, d_W^\infty, \overline{\Delta_d}).$$

Intuitively, the Gaussian noise smooths out densities of random variables that are associated with applying transformation in  $\overline{\mathcal{F}}$  to random variables in  $\overline{\mathcal{X}_d}$  or  $\overline{\Delta_d}$ . As a result, the proof of Theorem 20 has a kernel density estimation step on the smooth densities. Finally, we can use Proposition 16 to relate the Wasserstein covering number with the  $\|\cdot\|_2$  covering number. The following corollary is the result of Proposition 16 and Theorem 20.

**Corollary 21** (From a  $\|\cdot\|_2$  cover to a TV cover). *Let  $\mathcal{F}$  be a class of hypotheses  $f : \mathbb{R}^d \rightarrow \mathbb{R}^p$  and  $\overline{\mathcal{G}_{\sigma,p}}$  be a Gaussian noise class. Then for every  $\epsilon > 0$  and  $m \in \mathbb{N}$  we have*

$$N_U\left(\frac{9\epsilon}{2\sigma}, \overline{\mathcal{G}_{\sigma,p}} \circ \mathcal{F}, m, d_{TV}^\infty, \overline{\Delta_d}\right) \leq N_U(\epsilon, \mathcal{F}, m, \|\cdot\|_2^\infty),$$

$$N_U\left(\frac{9\epsilon}{2\sigma}, \overline{\mathcal{G}_{\sigma,p}} \circ \mathcal{F}, m, d_{TV}^{\ell_2}, \overline{\Delta_d}\right) \leq N_U(\epsilon, \mathcal{F}, m, \|\cdot\|_2^{\ell_2}).$$

The following theorem shows that we can get a stronger notion of TV cover with respect to  $\overline{\mathcal{G}_\sigma} \circ \overline{\mathcal{X}_{B,d}}$  from a  $\|\cdot\|_2$  global cover, given that some Gaussian noise is added to the output of hypotheses. However, finding a small  $\|\cdot\|_2$  global cover is usually a challenging task. The proof involves finding a Wasserstein covering number and using Theorem 20 to obtain TV covering number.

**Theorem 22** (From a global  $\|\cdot\|_2$  cover to a global TV cover). *Let  $\mathcal{F}$  be a class of hypotheses  $f : \mathbb{R}^d \rightarrow \mathbb{R}^p$  and  $\overline{\mathcal{G}_{\sigma,p}}$  be a Gaussian noise class. Then for every  $\epsilon > 0$  and  $m \in \mathbb{N}$  we have*

$$N_U\left(\frac{9\epsilon}{\sigma}, \overline{\mathcal{G}_{\sigma,p}} \circ \mathcal{F}, \infty, d_{TV}^\infty, \overline{\mathcal{G}_{\sigma,d}} \circ \overline{\mathcal{X}_{B,d}}\right) \leq N_U(\epsilon, \mathcal{F}, \infty, \|\cdot\|_2^\infty).$$

## 6 Uniform TV covers for single-layer neural networks

In this section, we study the uniform covering number of single-layer neural networks with respect to the total variation distance. This will set the stage for the next section, where we want to use the tools from Section 5 to bound covering numbers of deeper networks. We start with the following definition for the class of single-layer neural networks.

**Definition 23** (Single-Layer Sigmoid Neural Networks). *Let  $\Phi : \mathbb{R}^p \rightarrow [0, 1]^p$  be the element-wise sigmoid activation function defined by  $\Phi((x^{(1)}, \dots, x^{(p)})) = (\phi(x^{(1)}), \dots, \phi(x^{(p)}))$ , where  $\phi(x) = \frac{1}{1+e^{-x}}$  is the sigmoid function. The class of single-layer neural networks with  $d$  inputs and  $p$  outputs is defined by  $NET[d, p] = \{f_W : \mathbb{R}^d \rightarrow [0, 1]^p \mid f_W(x) = \Phi(W^\top x), W \in \mathbb{R}^{d \times p}\}$ .*

**Remark 24.** *We choose sigmoid function for simplicity, but our analysis for finding uniform covering numbers of neural networks (Theorem 25) is not specific to the sigmoid activation function. We present a stronger version of Theorem 25 in Appendix D which works for any activation function that is Lipschitz, monotone, and bounded.*

As mentioned in Remark 19, Lemma 18 requires stronger notion of covering numbers with respect to  $\overline{\mathcal{X}_d}$  and TV distance. In fact, the size of this kind of cover is infinite for deterministic neural networks defined above. In contrast, Theorem 25 shows that one can bound this covering number as long as some Gaussian noise is added to the input and output of the network. The proof is quite technical, starting with estimating the smoothed input distribution  $(\overline{g_\sigma}(x))$  with mixtures of Gaussians using kernel density estimation. Then a cover for mixtures of Gaussians with respect to Wasserstein distance is found. Finally, Theorem 20 helps to find the cover with respect to total variation distance. For a complete proof of theorem see Appendix D.

**Theorem 25** (A global total variation cover for noisy neural networks with unbounded weights). *For every  $p, d \in \mathbb{N}, \epsilon > 0, \sigma < 30d/\epsilon$  we have*

$$N_U(\epsilon, \overline{\mathcal{G}_\sigma} \circ NET[d, p], \infty, d_{TV}^\infty, \overline{\mathcal{G}_\sigma} \circ \overline{\mathcal{X}_{1,d}}) \leq \left( 282 \frac{d^{5/2} \sqrt{\ln((30d - \epsilon\sigma)/(\epsilon\sigma))}}{\epsilon^{3/2} \sigma^2} \ln\left(\frac{30d}{\epsilon\sigma}\right) \right)^{p(d+1)}.$$

Note that the dependence of the bound on  $1/\sigma$  is polynomial. The assumption  $\sigma \ll 30d/\epsilon$  holds for any reasonable application (we will use  $\sigma \ll 1$  in the experiments). In contrast to the analyses that exploit Lipschitz continuity, the above theorem does not require any assumptions on the norms of weights. Theorem 25 is a key tool in analyzing the uniform covering number of deeper networks.

## 7 Uniform covering numbers for deeper networks

In the following, we discuss how one can use Theorem 25 and techniques provided in Section 5 to obtain bounds on covering number for deeper networks. For a  $T$ -layer neural network, it is useful to separate the first layer from the rest of the network. The following theorem offers a bound on the uniform covering number of (the expectation of) a noisy network based on the usual  $\|\cdot\|_2^{\ell_2}$  covering number of the first layer and the TV covering number of the subsequent layers.

**Theorem 26.** *Let  $NET[d, p_1], NET[p_1, p_2], \dots, NET[p_{T-1}, p_T]$  be  $T$  classes of neural networks. Denote the  $T$ -layer noisy network by*

$$\overline{\mathcal{F}} = \overline{\mathcal{G}_\sigma} \circ NET[p_{T-1}, p_T] \circ \dots \circ \overline{\mathcal{G}_\sigma} \circ NET[p_1, p_2] \circ \overline{\mathcal{G}_\sigma} \circ NET[d, p_1],$$

*and let  $\mathcal{H} = \{h : \mathbb{R}^d \rightarrow [0, 1]^{p_T} \mid h(x) = \mathbb{E}_{\overline{\mathcal{F}}}[\overline{f}(x)], \overline{f} \in \overline{\mathcal{F}}\}$ . Denote the uniform covering numbers of compositions of neural network classes with the Gaussian noise class (with respect to  $d_{TV}^\infty$ ) as*

$$N_i = N_U\left(\frac{\epsilon}{2T\sqrt{p_T}}, \overline{\mathcal{G}_\sigma} \circ NET[p_{i-1}, p_i], \infty, d_{TV}^\infty, \overline{\mathcal{G}_\sigma} \circ \overline{\mathcal{X}_{1,p_{i-1}}}\right), \quad 2 \leq i \leq T, \quad (1)$$

297 and the uniform covering number of  $\overline{\mathcal{G}_\sigma} \circ \text{NET}[d, p_1]$  with respect to  $\|\cdot\|_2^{\ell_2}$  as

$$N_1 = N_U \left( \frac{2\sigma\epsilon}{18T\sqrt{p_T}}, \text{NET}[d, p_1], m, \|\cdot\|_2^{\ell_2} \right).$$

298 Then we have

$$N_U \left( \epsilon, \mathcal{H}, m, \|\cdot\|_2^{\ell_2} \right) \leq \prod_{i=1}^T N_i.$$

299 The  $\|\cdot\|_2^{\ell_2}$  covering number of the first layer (i.e.,  $N_1$  in above) can be bounded using standard  
 300 approaches in the literature. For instance, in Appendix H we will use the bound of Lemma 14.7 in  
 301 Anthony et al. (1999). Other  $N_i$ 's can be bounded using Theorem 25. The above bound does not  
 302 depend on the norm of weights and therefore we can use it for networks with large weights.

303 The proof of Theorem 26 involves applying Corollary 21 to turn the  $\|\cdot\|_2$  cover of first layer into a TV  
 304 cover. We then find a TV cover for rest of the network by combining Theorem 26 and Lemma 18. We  
 305 will compose the first layer with the rest of the network and bound the covering number by another  
 306 application of Lemma 18. Finally, we turn the TV covering number (of the entire network) back into  
 307  $\|\cdot\|_2^{\ell_2}$  covering number using Theorem 17. The complete proof can be found in Appendix E.

308 One can generalize the above analysis in the following way: instead of separating the first layer, one  
 309 can basically “break” the network from any layer, use existing  $\|\cdot\|_2$  covering number bounds for the  
 310 first few layers, and Theorem 25 for the rest. See Lemma 35 in Appendix E for details.

## 311 8 NVAC: a metric for comparing generalization bounds

312 We want to provide tools to compare different approaches in finding covering numbers and their  
 313 suggested generalization bounds. First, we define the notion of a generalization bound for clas-  
 314 sification. Let  $\mathcal{Y} = [k]$  and  $\mathcal{F}$  be a class of functions from  $\mathcal{X}$  to  $\mathbb{R}^k$ . Let  $\mathcal{A}$  be an algorithm  
 315 that receives a labeled sample  $S = ((x_1, y_1), \dots, (x_m, y_m)) \in (\mathcal{X} \times \mathcal{Y})^m$  and outputs a func-  
 316 tion  $\hat{h} \in \mathcal{F}$ . Note that the output of this function is a real vector so it can capture margin-based  
 317 classifiers too. Let  $l^{0-1} : \mathbb{R}^k \times [k] \rightarrow \{0, 1\}$  be the “thresholded” 0-1 loss function defined by  
 318  $l^{0-1}(u, y) = 1\{\arg\max_i u^{(i)} \neq y\}$  where  $u^{(i)}$  is the  $i$ -th dimension of  $u$ .

319 **Definition 27** (Generalization Bound for Classification). A (valid) generalization bound for  $\mathcal{A}$  with  
 320 respect to  $l^{0-1}$  and another (surrogate) loss function  $l$  is a function  $GB : \mathcal{F} \times (\mathcal{X} \times \mathcal{Y})^m \rightarrow \mathbb{R}$  such  
 321 that for every distribution  $\mathcal{D}$  over  $\mathcal{X} \times \mathcal{Y}$ , if  $S \sim \mathcal{D}^m$ , then with probability at least 0.99 (over the  
 322 randomness of  $S$ ) we have

$$\left| \frac{1}{m} \sum_{(x,y) \in S} l(\hat{h}(x), y) - \mathbb{E}_{(x,y) \sim \mathcal{D}} [l^{0-1}(\hat{h}(x), y)] \right| \leq GB(\hat{h}, S).$$

323 For example,  $GB(\hat{h}, S) = 2$  is a useless but valid generalization bound. Various generalization  
 324 bounds that have been proposed in the literature are examples of a  $GB$ . Note that  $GB$  can depend  
 325 both on  $S$  (for instance on  $|S|$ ) and on  $\hat{h}$  (for example, on the norm of the weights of network).

326 It is not straightforward to empirically compare generalization bounds since they are often vacuous  
 327 for commonly used applications. Jiang et al. (2019) address this by looking at other metrics, such as  
 328 the correlation of each bound with the actual generalization gap. While these metrics are informative,  
 329 it is also useful to know how far off each bound is from producing a “non-vacuous” bound (Dziugaite  
 330 and Roy, 2017). Therefore, we will take a more direct approach and propose the following metric.

331 **Definition 28** (NVAC). Let  $\hat{h}$  be a hypothesis,  $S \in (\mathcal{X} \times \mathcal{Y})^m$  a sample, and  $GB$  a generalization  
 332 bound for algorithm  $\mathcal{A}$ . Let  $S^n$  denote a sample of size  $mn$  which includes  $n$  copies of  $S$ . Let  $n^*$  be  
 333 the smallest integer such that the following holds:

$$GB(\hat{h}, S^{n^*}) + \frac{1}{|S^{n^*}|} \sum_{(x,y) \in S^{n^*}} l(\hat{h}(x), y) \leq 1.$$

334 We define NVAC to be  $|S^{n^*}| = mn^*$ .



Informally speaking, NVAC is an upper bound on the minimum number of samples required to obtain a non-vacuous generalization bound. Approaches that get tighter upper bounds on covering number will generally result in smaller NVACs. In Appendix G, we will show how one can calculate NVAC using the uniform covering number bounds.

## 9 Experiments

In this section, we empirically compare different approaches in bounding the covering number using the NVAC metric. We compare the following approaches in bounding covering number: Theorem 26, Norm-based (Theorem 14.17 in Anthony et al. (1999)), Lipschitzness-based (Theorem 14.5 in Anthony et al. (1999)), Pseudo-dim-based (Theorem 14.2 in Anthony et al. (1999)), and Spectral (Bartlett et al. (2017)). More details about these bounds can be found in Appendix H.

We train fully connected neural networks on MNIST dataset. We use a network with an input layer, an output layer, and three hidden layers each containing 250 hidden neurons as the baseline architecture. See Appendix I for the details of the learning settings. The left two graphs in Figure 1 depict NVACs as functions of the depth and width of the network. It can be observed that our approach achieves the smallest NVAC. The Norm-based bound is the worst and is removed from the graph (see Appendix I). Overall, bounds that are based on the norm of the weights (even the spectral norm) perform poorly compared to those that are based on the parameter count. This is an interesting observation since we have millions of parameters ( $\approx 3 \times 10^9$ ) in some of the wide networks and one would assume approaches based on norm of weights should be able to explain generalization behaviour better. There are several reasons why our bound performs better. First, the dependence of NVAC on  $1/\epsilon$  is linear for the Spectral approach and polynomial for Norm-based approach while the dependence is logarithmic in our approach. Second, norm-based bounds depend on product of norms and group norms which can get quite large. Finally, our method works naturally for multi-output layers, while the Pseudo-dim-based approach works for real-valued output (and therefore one needs to bound the cover for each output separately).

The covering number bound of Theorem 26 has a polynomial dependence on  $1/\sigma$ . Therefore, NVAC has a mild logarithmic dependence on  $1/\sigma$  (see Appendix G for details). The third graph in Figure 1 corroborates that even a negligible amount of noise ( $\sigma \approx 10^{-240}$ ) is sufficient to get tighter bounds on NVAC compared to other approaches. Finally, the right graph in Figure 1 shows that even with a considerable amount of noise (e.g,  $\sigma = 0.2$ ), the train and test accuracy of the model remain almost unchanged. This is perhaps expected, as the dynamics of training neural networks with gradient descent is already noisy even without adding Gaussian noise. Overall, our preliminary experiment shows that small amount of noise does not affect the performance, yet it enables us to prove tighter generalization bounds.

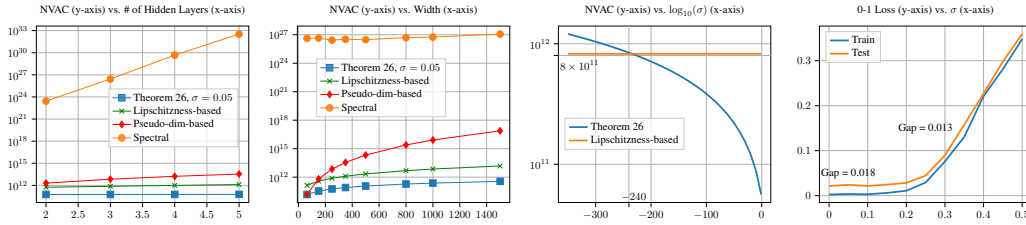

Figure 1: The left two graphs depict NVAC of different generalization bounds as a function of the number of hidden layers and width of the network. The Norm-based approach is excluded because of its excessively high NVAC (see Appendix I). The third graph plots NVAC against  $\log_{10}(\sigma)$  ( $\sigma$  is standard deviation of noise) for the two best approaches. The rightmost graph plots the train/test 0-1 losses for different values of  $\sigma$ . The gaps between the train and test losses are shown for  $\sigma = 0, 0.3$ .

**Limitations and Future Work.** Our analysis is based on the assumption that the activation function is bounded. Therefore, extending the results to ReLU neural networks is not immediate, and is left for future work. Also, our empirical analysis is preliminary and is mostly used as a sanity check. Further empirical evaluations can help to better understand the role of noise in training neural networks.

## References

- Martin Anthony, Peter L Bartlett, Peter L Bartlett, et al. *Neural network learning: Theoretical foundations*, volume 9. cambridge university press Cambridge, 1999.
- Sanjeev Arora, Rong Ge, Behnam Neyshabur, and Yi Zhang. Stronger generalization bounds for deep nets via a compression approach. In *International Conference on Machine Learning*, pages 254–263. PMLR, 2018.
- Sanjeev Arora, Nadav Cohen, Wei Hu, and Yuping Luo. Implicit regularization in deep matrix factorization. *Advances in Neural Information Processing Systems*, 32, 2019.
- Peter Bartlett. For valid generalization the size of the weights is more important than the size of the network. *Advances in neural information processing systems*, 9, 1996.
- Peter Bartlett, Vitaly Maierov, and Ron Meir. Almost linear vc dimension bounds for piecewise polynomial networks. *Advances in neural information processing systems*, 11, 1998.
- Peter L Bartlett and Wolfgang Maass. Vapnik-chervonenkis dimension of neural nets. *The handbook of brain theory and neural networks*, pages 1188–1192, 2003.
- Peter L Bartlett, Michael I Jordan, and Jon D McAuliffe. Convexity, classification, and risk bounds. *Journal of the American Statistical Association*, 101(473):138–156, 2006.
- Peter L Bartlett, Dylan J Foster, and Matus J Telgarsky. Spectrally-normalized margin bounds for neural networks. *Advances in neural information processing systems*, 30, 2017.
- Peter L Bartlett, Nick Harvey, Christopher Liaw, and Abbas Mehrabian. Nearly-tight vc-dimension and pseudodimension bounds for piecewise linear neural networks. *The Journal of Machine Learning Research*, 20(1):2285–2301, 2019.
- Peter L Bartlett, Philip M Long, Gábor Lugosi, and Alexander Tsigler. Benign overfitting in linear regression. *Proceedings of the National Academy of Sciences*, 117(48):30063–30070, 2020.
- Peter L Bartlett, Andrea Montanari, and Alexander Rakhlin. Deep learning: a statistical viewpoint. *Acta numerica*, 30:87–201, 2021.
- Eric Baum and David Haussler. What size net gives valid generalization? *Advances in neural information processing systems*, 1, 1988.
- Mikhail Belkin, Daniel J Hsu, and Partha Mitra. Overfitting or perfect fitting? risk bounds for classification and regression rules that interpolate. *Advances in neural information processing systems*, 31, 2018.
- Mikhail Belkin, Alexander Rakhlin, and Alexandre B Tsybakov. Does data interpolation contradict statistical optimality? In *The 22nd International Conference on Artificial Intelligence and Statistics*, pages 1611–1619. PMLR, 2019.
- Stéphane Boucheron, Olivier Bousquet, and Gábor Lugosi. Theory of classification: A survey of some recent advances. *ESAIM: probability and statistics*, 9:323–375, 2005.
- Minwoo Chae and Stephen G Walker. Wasserstein upper bounds of the total variation for smooth densities. *Statistics & Probability Letters*, 163:108771, 2020.
- Lenaic Chizat and Francis Bach. Implicit bias of gradient descent for wide two-layer neural networks trained with the logistic loss. In *Conference on Learning Theory*, pages 1305–1338. PMLR, 2020.
- Ilias Diakonikolas, Gautam Kamath, Daniel Kane, Jerry Li, Ankur Moitra, and Alistair Stewart. Robust estimators in high-dimensions without the computational intractability. *SIAM Journal on Computing*, 48(2):742–864, 2019.
- Richard M Dudley. Universal donsker classes and metric entropy. In *Selected Works of RM Dudley*, pages 345–365. Springer, 2010.

417 Gintare Karolina Dziugaite and Daniel M. Roy. Computing nonvacuous generalization bounds for  
418 deep (stochastic) neural networks with many more parameters than training data. In *Proceedings*  
419 *of the 33rd Annual Conference on Uncertainty in Artificial Intelligence (UAI)*, 2017.

420 Wei Gao and Zhi-Hua Zhou. Dropout rademacher complexity of deep neural networks. *Science*  
421 *China Information Sciences*, 59(7):1–12, 2016.

422 Paul W Goldberg and Mark R Jerrum. Bounding the vapnik-chervonenkis dimension of concept  
423 classes parameterized by real numbers. *Machine Learning*, 18(2):131–148, 1995.

424 Noah Golowich, Alexander Rakhlin, and Ohad Shamir. Size-independent sample complexity of  
425 neural networks. In *Conference On Learning Theory*, pages 297–299. PMLR, 2018.

426 Suriya Gunasekar, Blake E Woodworth, Srinadh Bhojanapalli, Behnam Neyshabur, and Nati Srebro.  
427 Implicit regularization in matrix factorization. *Advances in Neural Information Processing Systems*,  
428 30, 2017.

429 Ziwei Ji and Matus Telgarsky. Characterizing the implicit bias via a primal-dual analysis. In  
430 *Algorithmic Learning Theory*, pages 772–804. PMLR, 2021.

431 Ziwei Ji, Miroslav Dudík, Robert E Schapire, and Matus Telgarsky. Gradient descent follows the  
432 regularization path for general losses. In *Conference on Learning Theory*, pages 2109–2136.  
433 PMLR, 2020.

434 Yiding Jiang, Behnam Neyshabur, Hossein Mobahi, Dilip Krishnan, and Samy Bengio. Fantastic  
435 generalization measures and where to find them. *arXiv preprint arXiv:1912.02178*, 2019.

436 Kam-Chuen Jim, C Lee Giles, and Bill G Horne. An analysis of noise in recurrent neural networks:  
437 convergence and generalization. *IEEE Transactions on neural networks*, 7(6):1424–1438, 1996.

438 Pascal Koiran and Eduardo D Sontag. Vapnik-chervonenkis dimension of recurrent neural networks.  
439 *Discrete Applied Mathematics*, 86(1):63–79, 1998.

440 Beatrice Laurent and Pascal Massart. Adaptive estimation of a quadratic functional by model selection.  
441 *Annals of Statistics*, pages 1302–1338, 2000.

442 Soon Hoe Lim, N Benjamin Erichson, Liam Hodgkinson, and Michael W Mahoney. Noisy recurrent  
443 neural networks. *Advances in Neural Information Processing Systems*, 34, 2021.

444 Philip M Long and Hanie Sedghi. Size-free generalization bounds for convolutional neural networks.  
445 In *International Conference on Learning Representations*, 2020.

446 Wolfgang Maass. Neural nets with superlinear vc-dimension. *Neural Computation*, 6(5):877–884,  
447 1994.

448 Mehryar Mohri, Afshin Rostamizadeh, and Ameet Talwalkar. *Foundations of machine learning*. MIT  
449 press, 2018.

450 Vaishnavh Nagarajan and J Zico Kolter. Uniform convergence may be unable to explain generalization  
451 in deep learning. *Advances in Neural Information Processing Systems*, 32, 2019.

452 Vaishnavh Nagarajan and Zico Kolter. Deterministic pac-bayesian generalization bounds for deep net-  
453 works via generalizing noise-resilience. In *International Conference on Learning Representations*,  
454 2018.

455 Behnam Neyshabur, Ryota Tomioka, and Nathan Srebro. Norm-based capacity control in neural  
456 networks. In *Conference on Learning Theory*, pages 1376–1401. PMLR, 2015.

457 Behnam Neyshabur, Srinadh Bhojanapalli, and Nathan Srebro. A pac-bayesian approach to spectrally-  
458 normalized margin bounds for neural networks. In *International Conference on Learning Repre-*  
459 *sentations*, 2018.

460 Shai Shalev-Shwartz and Shai Ben-David. *Understanding machine learning: From theory to*  
461 *algorithms*. Cambridge university press, 2014.

- 462 Eduardo D Sontag et al. Vc dimension of neural networks. *NATO ASI Series F Computer and Systems*  
463 *Sciences*, 168:69–96, 1998.
- 464 Nitish Srivastava, Geoffrey Hinton, Alex Krizhevsky, Ilya Sutskever, and Ruslan Salakhutdinov.  
465 Dropout: a simple way to prevent neural networks from overfitting. *The journal of machine*  
466 *learning research*, 15(1):1929–1958, 2014.
- 467 Vladimir Vapnik. *The nature of statistical learning theory*. Springer science & business media, 1999.
- 468 Mathukumalli Vidyasagar. *A theory of learning and generalization: with applications to neural*  
469 *networks and control systems*. Springer-Verlag, 1997.
- 470 Pascal Vincent, Hugo Larochelle, Yoshua Bengio, and Pierre-Antoine Manzagol. Extracting and  
471 composing robust features with denoising autoencoders. In *Proceedings of the 25th international*  
472 *conference on Machine learning*, pages 1096–1103, 2008.
- 473 Li Wan, Matthew Zeiler, Sixin Zhang, Yann Le Cun, and Rob Fergus. Regularization of neural  
474 networks using dropconnect. In *International conference on machine learning*, pages 1058–1066.  
475 PMLR, 2013.
- 476 Haotian Wang, Wenjing Yang, Zhenyu Zhao, Tingjin Luo, Ji Wang, and Yuhua Tang. Rademacher  
477 dropout: An adaptive dropout for deep neural network via optimizing generalization gap. *Neuro-*  
478 *computing*, 357:177–187, 2019.
- 479 Chiyuan Zhang, Samy Bengio, Moritz Hardt, Benjamin Recht, and Oriol Vinyals. Understanding deep  
480 learning (still) requires rethinking generalization. *Communications of the ACM*, 64(3):107–115,  
481 2021.
- 482 Tong Zhang. Covering number bounds of certain regularized linear function classes. *Journal of*  
483 *Machine Learning Research*, 2(Mar):527–550, 2002.
- 484 Wenda Zhou, Victor Veitch, Morgane Austern, Ryan P Adams, and Peter Orbanz. Non-vacuous  
485 generalization bounds at the imagenet scale: a pac-bayesian compression approach. In *International*  
486 *Conference on Learning Representations (ICLR)*, 2019.

## 487 Checklist

- 488 1. For all authors...
- 489 (a) Do the main claims made in the abstract and introduction accurately reflect the paper’s  
490 contributions and scope? [Yes] The main claims of the paper in abstract and introduction  
491 are stated as theorems, lemmas and propositions, which are proved in appendices.
- 492 (b) Did you describe the limitations of your work? [Yes] We discuss the limitations of our  
493 experiments and possible future work in “Limitations and Future Work”.
- 494 (c) Did you discuss any potential negative societal impacts of your work? [N/A] This is a  
495 mainly theoretical paper and is unlikely to have any negative societal impacts.
- 496 (d) Have you read the ethics review guidelines and ensured that your paper conforms to  
497 them? [Yes]
- 498 2. If you are including theoretical results...
- 499 (a) Did you state the full set of assumptions of all theoretical results? [Yes]
- 500 (b) Did you include complete proofs of all theoretical results? [Yes] The theorems and  
501 lemmas are proved in appendices.
- 502 3. If you ran experiments...
- 503 (a) Did you include the code, data, and instructions needed to reproduce the main experi-  
504 mental results (either in the supplemental material or as a URL)? [Yes] The codes will  
505 be provided as a supplemental material.
- 506 (b) Did you specify all the training details (e.g., data splits, hyperparameters, how they  
507 were chosen)? [Yes] See Appendix I.

- 508 (c) Did you report error bars (e.g., with respect to the random seed after running exper-  
 509 iments multiple times)? [Yes] We provide accuracy and error measures in the main  
 510 paper and supplemental material.
- 511 (d) Did you include the total amount of compute and the type of resources used (e.g., type  
 512 of GPUs, internal cluster, or cloud provider)? [Yes] See Appendix I
- 513 4. If you are using existing assets (e.g., code, data, models) or curating/releasing new assets...
- 514 (a) If your work uses existing assets, did you cite the creators? [Yes] We experiment on  
 515 the publicly available MNIST dataset, which is mentioned in the main paper.
- 516 (b) Did you mention the license of the assets? [Yes] We provide our code as a supplemental  
 517 material which does not require a license. We use MNIST dataset and discuss it in  
 518 Appendix I.
- 519 (c) Did you include any new assets either in the supplemental material or as a URL? [Yes]  
 520 We provide our code in the supplemental material.
- 521 (d) Did you discuss whether and how consent was obtained from people whose data you're  
 522 using/curating? [N/A] We use MNIST dataset which is a publicly available.
- 523 (e) Did you discuss whether the data you are using/curating contains personally identifiable  
 524 information or offensive content? [N/A] We use MNIST dataset which is a collection  
 525 of handwritten digits and does not contain personal information or offensive content.
- 526 5. If you used crowdsourcing or conducted research with human subjects...
- 527 (a) Did you include the full text of instructions given to participants and screenshots, if  
 528 applicable? [N/A]
- 529 (b) Did you describe any potential participant risks, with links to Institutional Review  
 530 Board (IRB) approvals, if applicable? [N/A]
- 531 (c) Did you include the estimated hourly wage paid to participants and the total amount  
 532 spent on participant compensation? [N/A]

## 533 A Miscellaneous facts

534 **Lemma 29** (Data processing inequality for TV distance). *Given two random variables  $\overline{x}_1, \overline{x}_2 \in \overline{\mathcal{X}}$ ,  
 535 and a (random) Borel function  $f : \mathcal{X} \rightarrow \mathcal{Y}$ ,*

$$d_{TV}(f(\overline{x}_1), f(\overline{x}_2)) \leq d_{TV}(\overline{x}_1, \overline{x}_2).$$

536 The next theorem, bounds the total variation distance between two Gaussian random variables.

537 **Theorem 30** (Total variation distance between Gaussians with same covariance). *Let  $\mathcal{N}(\mu_1, \sigma^2 I_d)$   
 538 and  $\mathcal{N}(\mu_2, \sigma^2 I_d)$  be two Gaussian random variables, where  $I_d$  is the  $d$ -by- $d$  identity matrix. Then  
 539 we have,*

$$d_{TV}(\mathcal{N}(\mu_1, \sigma^2 I_d), \mathcal{N}(\mu_2, \sigma^2 I_d)) \leq \frac{1}{2\sigma} \|\mu_1 - \mu_2\|_2.$$

540 *Proof.* From Pinsker's inequality we know that for any two distributions  $P$  and  $Q$  we have

$$d_{TV}(P, Q) \leq \sqrt{\frac{1}{2} d_{KL}(P, Q)}, \quad (2)$$

541 where  $d_{KL}(P, Q)$  is the Kullback-Liebler (KL) divergence between  $P$  and  $Q$ . We can find the  
 542 KL divergence between  $\mathcal{N}(\mu_1, \sigma^2 I_d)$  and  $\mathcal{N}(\mu_2, \sigma^2 I_d)$  as (see e.g., Diaconikolas et al. (2019))

$$d_{KL}(\mathcal{N}(\mu_1, \sigma^2 I_d), \mathcal{N}(\mu_2, \sigma^2 I_d)) \leq \frac{1}{2\sigma^2} \|\mu_1 - \mu_2\|_2^2. \quad (3)$$

543 Combining Equations 2 and 3 concludes the result.  $\square$

544 **Lemma 31.** *Let  $Y \sim \chi_n^2$  be a chi-squared random variable with  $n$  degrees of freedom. Then we  
 545 have (Laurent and Massart, 2000)*

$$\mathbb{P}[Y - n \geq 2\sqrt{nt} + 2t] \leq e^{-t}.$$

546 **Lemma 32.** Let  $x = \sum_{i=1}^m w_i g_i$  be a random variable, where  $g_i$  are  $d$ -dimensional Gaussian random  
 547 variables with means  $\mu_i \in [-B, B]^d$  and covariance matrices of  $\sigma^2 I_d$ . We have

$$\mathbb{P} \left[ \|x\|_2 \geq (B + \sigma)\sqrt{d} + \sigma\sqrt{2t} \right] \leq e^{-t}.$$

548 *Proof.* We know that for any  $R \in \mathbb{R}$

$$\mathbb{P} [\|x\|_2^2 \geq R^2] = \sum_{i=1}^m w_i \mathbb{P} [\|g_i\|_2^2 \geq R^2] = \sum_{i=1}^m w_i \mathbb{P} [\|\sigma y_i + \mu_i\|_2^2 \geq R^2] = \sum_{i=1}^m w_i \mathbb{P} [\|\sigma y_i + \mu_i\|_2 \geq R],$$

549 where  $y_i \sim \mathcal{N}(0, I_d)$  are standard normal random variables. Using triangle inequality we can rewrite  
 550 the above equation as

$$\mathbb{P} [\|x\|_2^2 \geq R^2] \leq \sum_{i=1}^m w_i \mathbb{P} [\|\sigma y_i\|_2 + \|\mu_i\|_2 \geq R] \leq \sum_{i=1}^m w_i \mathbb{P} [\|\sigma y_i\|_2 + B\sqrt{d} \geq R].$$

551 We can, therefore, conclude that

$$\mathbb{P} [\|x\|_2^2 \geq R^2] \leq \mathbb{P} \left[ \|y_i\|_2^2 \geq \left( \frac{R - B\sqrt{d}}{\sigma} \right)^2 \right].$$

552 Setting  $R = (B + \sigma)\sqrt{d} + \sigma\sqrt{2t}$ , we can write

$$\begin{aligned} & \mathbb{P} [\|x\|_2 \geq (B + \sigma)\sqrt{d} + \sigma\sqrt{2t}] \\ &= \mathbb{P} \left[ \|x\|_2^2 \geq \left( (B + \sigma)\sqrt{d} + \sigma\sqrt{2t} \right)^2 \right] \\ &\leq \mathbb{P} [\|y_i\|_2^2 \geq (\sqrt{d} + \sqrt{2t})^2] \\ &\leq \mathbb{P} [\|y_i\|_2^2 \geq d + 2t + 2\sqrt{dt}] \\ &\leq e^{-t}. \end{aligned}$$

553

□

## 554 B Proofs of propositions in Section 3

### 555 B.1 Proof of Proposition 7

556 *Proof.* Fix an input set  $S = \{x_1, \dots, x_m\}$ . Let  $C = \{\hat{f}_i|_S \mid \hat{f}_i \in \mathcal{F}, i \in [r_1]\}$  be 0.5-cover for  $\mathcal{F}|_S$   
 557 with respect to  $\rho^\infty$ . Therefore, given any  $f|_S \in \mathcal{F}|_S$  there exists  $\hat{f}_i|_S \in C$  such that

$$\rho^\infty \left( (f(x_1), \dots, f(x_m)), (\hat{f}_i(x_1), \dots, \hat{f}_i(x_m)) \right) \leq 0.5 \quad (4)$$

558 Since  $\rho \left( f(x), \hat{f}_i(x) \right) = 1\{f(x) \neq \hat{f}_i(x)\}$ , Equation 4 suggests that  $f(x_l) = \hat{f}_i(x_k)$  for any  
 559  $k \in [m]$ . Let  $S' = \{\hat{f}_i(x_k) \mid i \in [r_1], k \in [m]\}$  and  $C' = \{\hat{h}_j|_{S'} \mid \hat{h}_j \in \mathcal{H}, j \in [r_2]\}$  be an  $\epsilon$ -cover  
 560 for  $\mathcal{H}|_{S'}$  with respect to  $\|\cdot\|_2^\infty$ . We know that  $|S'| \leq mr_1$ . Denote  $\hat{\mathcal{Q}} = \{\hat{h}_j \circ \hat{f}_i \mid i \in [r_1], j \in [r_2]\}$ .  
 561 We will prove that  $\hat{\mathcal{Q}}|_S$  is an  $\epsilon$ -cover for  $(\mathcal{H} \circ \mathcal{F})|_S$  with respect to  $\|\cdot\|_2^\infty$ . Consider  $(h \circ f)|_S =$   
 562  $(h(f(x_1)), \dots, h(f(x_m))) \in (\mathcal{H} \circ \mathcal{F})|_S$ . Since  $C$  is a 0.5-cover for  $\mathcal{F}|_S$ , from equation 4, we know  
 563 that there exists  $\hat{f}_i \in \mathcal{F}$  such that  $f(x_k) = \hat{f}_i(x_k)$  for any  $k \in [m]$ . On the other hand, for any  
 564  $k \in [m]$ ,  $\hat{f}_i(x_k)$  is an element of  $S'$ , consequently, there exists  $\hat{h}_j \in \mathcal{H}$  such that

$$\begin{aligned} & \left\| (h(\hat{f}_i(x_1)), \dots, h(\hat{f}_i(x_m))) - (\hat{h}_j(\hat{f}_i(x_1)), \dots, \hat{h}_j(\hat{f}_i(x_m))) \right\|_2^\infty \\ &= \left\| (h(f(x_1)), \dots, h(f(x_m))) - (\hat{h}_j(\hat{f}_i(x_1)), \dots, \hat{h}_j(\hat{f}_i(x_m))) \right\|_2^\infty \\ &\leq \epsilon \end{aligned}$$

From the above equation, we can conclude that  $(\mathcal{H} \circ \mathcal{F})|_S$  is  $\epsilon$ -covered by  $\hat{\mathcal{Q}}|_S$ . Clearly,  $|\hat{\mathcal{Q}}|_S| \leq r_1 r_2$  and we know that  $mr_1 \leq mN_1$ . Therefore,  $N(\epsilon, \mathcal{H}|_{S'}, \|\cdot\|_2^\infty) \leq N_U(\epsilon, \mathcal{H}, mr_1, \|\cdot\|_2^\infty) \leq N_U(\epsilon, \mathcal{H}, mN_1, \|\cdot\|_2^\infty)$ . This result holds for any input set  $S \subset \mathcal{X}^m$  with  $|S| = m$ , therefore, it follows that

$$N_U(\epsilon, \mathcal{H} \circ \mathcal{F}, m, \|\cdot\|_2^\infty) \leq N_1 \cdot N_U(\epsilon, \mathcal{H}, mN_1, \|\cdot\|_2^\infty).$$

569

□

## 570 B.2 Proof of Proposition 8

*Proof.* The proof for the bound of  $N_U(\epsilon, \mathcal{F}, m, \|\cdot\|_2^{\ell_2})$  can be found under Theorem 3 in Zhang (2002). Since  $\mathcal{H}$  is a singleton class, it is easy to verify  $N_U(\epsilon, \mathcal{H}, m, \|\cdot\|_2^\infty) = 1$ . We prove that the covering number of  $\mathcal{H} \circ \mathcal{F}$  is unbounded by contradiction. Let  $S = \{x_1, \dots, x_m\} \in (0, 1)^m$  be an input set where  $0 < x_1 \leq \dots \leq x_m$ . Denote  $C = \{(h \circ \hat{f}_i)|_S = (\frac{1}{\hat{w}_i x_1}, \dots, \frac{1}{\hat{w}_i x_m}) \mid \hat{f}_i \in \mathcal{F}, i \in [r]\}$  to be an  $\epsilon$ -cover for  $(\mathcal{H} \circ \mathcal{F})|_S$  where  $|C| = r_1$  is finite. We know that  $\hat{w}_i > 0$  for  $i \in [r]$ . Denote  $w^* = \min_{i \in [r], \hat{w}_i > 0} \hat{w}_i$ . Take any  $w < \frac{1}{\frac{1}{w^*} + x_1 \epsilon} \leq \frac{1}{\frac{1}{\hat{w}_i} + x_1 \epsilon}$  and denote the corresponding function by  $f \in \mathcal{F}$ , i.e.,  $f(x) = wx$ . we know that for every  $i \in [r]$

$$\frac{1}{wx_1} > \frac{w}{\hat{w}_i x_1} + \epsilon.$$

578 This means that

$$\begin{aligned} & \left\| \left( \frac{w}{x_1}, \dots, \frac{w}{x_m} \right) - \left( \frac{\hat{w}_i}{x_1}, \dots, \frac{\hat{w}_i}{x_m} \right) \right\|_2 \\ &= \sqrt{\frac{1}{m} \sum_{i=1}^m \left( \frac{w}{x_1} - \frac{\hat{w}_i}{x_1} \right)^2} \geq \epsilon \end{aligned}$$

Therefore, there is no  $(h \circ \hat{f}_i)|_S \in C$  such that  $\|(h \circ \hat{f}_i)|_S - (h \circ f)|_S\|_2^{\ell_2} \leq \epsilon$ , which contradicts with the assumption that  $C$  is an  $\epsilon$ -cover for  $(\mathcal{H} \circ \mathcal{F})|_S$ . □

## 581 B.3 Proof of Proposition 9

*Proof.* Let  $\mathcal{F}_{\gamma, \epsilon}$  denote the class of all functions  $f_{\gamma, \epsilon}$  from  $\mathcal{X}$  to  $\mathbb{R}$  such that  $|f(x) - x| \leq \gamma$  for any  $x \in \mathcal{X}$ , where  $\gamma \leq \epsilon/2$ . Fix an input set  $S = \{x_1, \dots, x_m\}$ . We know that given any  $f_{\gamma, \epsilon}, f'_{\gamma, \epsilon} \in \mathcal{F}_{\gamma, \epsilon}$  and  $i \in [m]$ ,

$$\|f_{\gamma, \epsilon}(x_i) - f'_{\gamma, \epsilon}(x_i)\| \leq \|f_{\gamma, \epsilon}(x_i) - x_i\| + \|x_i - f'_{\gamma, \epsilon}(x_i)\| \leq \epsilon.$$

Therefore, it is easy to conclude that  $N_U(\epsilon, \mathcal{F}_{\gamma, \epsilon}, m, \|\cdot\|_2^\infty) = 1$ . Let  $\mathcal{H}$  to be the class of all threshold functions  $h_a$  from  $\mathbb{R}$  to  $[0, 1]$ , where  $h_a(x) = 1\{x \geq a\}$ . Consider an input set  $S = \{x_1, \dots, x_m\}$  where  $x_1 \leq \dots \leq x_m$ . Given any  $k \in [m]$  we can find  $a \in \mathbb{R}$  such that  $x_i < a$  for  $1 \leq i \leq k$  and  $x_i \geq a$  for  $k < i \leq m$ , e.g., set  $a = (x_k + x_{k+1})/2$ . We also know that for any  $i, j \in [m]$ ,  $h_a(x_i) \neq h_a(x_j)$  only if  $x_i < a \leq x_j$ . Therefore, it is easy to verify that  $\mathcal{H}|_S = m + 1$  and that for any  $h_a|_S$  and  $h_{a'}|_S$  in  $\mathcal{H}|_S$  we have  $\|h_{a'}|_S - h_a|_S\|_2 \geq 1$ . We can therefore conclude that  $N_U(\epsilon, \mathcal{H}, m, \|\cdot\|_2^\infty) = m + 1$ . Next, consider the class  $\mathcal{H} \circ \mathcal{F}_{\gamma, \epsilon}$ . We prove that  $N_U(\epsilon', \mathcal{H} \circ \mathcal{F}_{\gamma, \epsilon}, m, \|\cdot\|_2^\infty) = 2^m$ .

We first mention the fact that given any  $(y_1, \dots, y_m)$  and  $(y'_1, \dots, y'_m)$  in  $\{0, 1\}^m$  if there exists  $i \in [m]$  such that  $y_i \neq y'_i$ , then  $\|(y'_1, \dots, y'_m) - (y_1, \dots, y_m)\|_2 \geq 1$ . Also, the range of the functions in  $\mathcal{H} \circ \mathcal{F}$  is  $[0, 1]$ , therefore, we are only interested in  $\epsilon' < 1$ . In the following, we prove that for any  $m$  there exists a set  $S'$  with  $|S'| = m$  such that the restriction of  $\mathcal{H} \circ \mathcal{F}$  to set  $S'$  has  $2^m$  elements and the result follows.

Consider the input set  $S' = \{z_1, \dots, z_m\}$  such that  $0 \leq z_1 < \dots < z_m \leq \epsilon/2$ . Given any  $(y_1, \dots, y_m) \in \{0, 1\}^m$  we map  $(z_1, \dots, z_m)$  to  $(e_1, \dots, e_m)$  as follows: for any  $i \in [m]$  if  $y_i = 1$  we define  $e_i = z_i + \epsilon/2$ , otherwise we define  $e_i = z_i - \epsilon/2$ . This mapping can be done by some function  $f_{\gamma, \epsilon}$  from  $\mathcal{F}_{\gamma, \epsilon}$  since for any  $i \in [m]$  we have  $|e_i - z_i| = \epsilon/2$ . Let  $a = \epsilon/4$ . We know that  $h_a(e_i)$  is 1 if  $y_i = 1$  and 0 otherwise. Therefore, we can conclude that for every element  $(y_1, \dots, y_m)$

in  $\{0, 1\}^m$ , there exists  $(h_a \circ f_{\gamma, \epsilon})_{|S'}$  in  $(\mathcal{H} \circ \mathcal{F}_{\gamma, \epsilon})_{|S'}$  such that  $(\mathcal{H} \circ \mathcal{F}_{\gamma, \epsilon})_{|S'} = (y_1, \dots, y_m)$ . Since  $|\{0, 1\}^m| = 2^m$ , we can say that  $N(\epsilon', (\mathcal{H} \circ \mathcal{F}_{\gamma, \epsilon})_{|S}, \|\cdot\|_2^{\infty, m}) = 2^m$ . Therefore,

$$N_U(\epsilon', \mathcal{H} \circ \mathcal{F}_{\gamma, \epsilon}, m, \|\cdot\|_2^\infty) = \sup_{|S|=m} \{N(\epsilon', (\mathcal{H} \circ \mathcal{F}_{\gamma, \epsilon})_{|S}, \|\cdot\|_2^{\infty, m})\} \geq 2^m.$$

□

## C Proofs of theorems and lemmas in Section 5

**Notation.** For a (random) function  $f$  and an input set  $S = \{x_1, \dots, x_m\}$ , we define the restriction of  $f$  to  $S$  as  $f_{|S} = (f(x_1), \dots, f(x_m))$ . Therefore, the restriction of the class  $\mathcal{F}$  to  $S$  can be denoted as  $\mathcal{F}_{|S} = \{f_{|S} : f \in \mathcal{F}\}$ . We also denote by  $\mathcal{D}(\bar{x})$  the probability density functions of the random variable  $\bar{x}$ . For two Borel functions  $f_1$  and  $f_2$ , we denote by  $\pi^*(f_1(\bar{x}), f_2(\bar{x}))$  a coupling between random variables  $f_1(\bar{x}), f_2(\bar{x})$  such that

$$\mathcal{M}_{\pi^*}(A) = \begin{cases} \mathcal{M}_{\bar{x}}(B) & \exists B \subset \mathcal{B}(\mathcal{X}) \text{ such that } A = f_1(B) \times f_2(B) \\ 0 & \text{otherwise,} \end{cases}$$

where  $\mathcal{B}(\mathcal{X})$  is the set of all Borel sets over  $\mathcal{X}$ ,  $\mathcal{M}_{\pi^*}(A)$  is the measure that  $\pi^*$  assigns to the Borel set  $A$ , and  $\mathcal{M}_{\bar{x}}(B)$  is the measure that random variable  $\bar{x}$  assigns to Borel set  $B$ . Let  $\Omega_{\pi^*} = \cup_{\{B | \mathcal{M}_{\bar{x}}(B) \neq 0\}} B$ .

### C.1 Proof of Theorem 17

*Proof.* It is easy to verify that  $N_U(\epsilon, \bar{\mathcal{F}}, m, d_{TV}^\infty, \bar{\Delta}_d) \leq N_U(\epsilon, \bar{\mathcal{F}}, m, d_{TV}^\infty, \bar{\mathcal{X}}_d)$ . Since we know that  $\bar{\Delta}_d \subset \bar{\mathcal{X}}_d$ , we have

$$N_U(\epsilon, \bar{\mathcal{F}}, m, d_{TV}^\infty, \bar{\Delta}_d) = \sup_{\substack{\bar{S} \subset \bar{\Delta}_d \\ |\bar{S}|=m}} \left\{ N(\epsilon, \bar{\mathcal{F}}_{|\bar{S}}, d_{TV}^\infty) \right\} \leq \sup_{\substack{\bar{S} \subset \bar{\mathcal{X}}_d \\ |\bar{S}|=m}} \left\{ N(\epsilon, \bar{\mathcal{F}}_{|\bar{S}}, d_{TV}^\infty) \right\} = N_U(\epsilon, \bar{\mathcal{F}}, m, d_{TV}^\infty, \bar{\mathcal{X}}_d). \quad (5)$$

Let  $S = \{x_1, \dots, x_m\} \subset \mathbb{R}^d$  be an input set. Denote  $\bar{S} = \{\bar{\delta}_{x_1}, \dots, \bar{\delta}_{x_m}\} \subset \bar{\Delta}_d$  and let  $C = \{\bar{f}_{1|\bar{S}}, \dots, \bar{f}_{r|\bar{S}} \mid \bar{f}_r \in \bar{\mathcal{F}}, i \in [r]\}$  be an  $\epsilon$ -cover for  $\bar{\mathcal{F}}_{|\bar{S}}$  with respect to  $d_{TV}^\infty$ . Define a new set of non-random functions  $\hat{\mathcal{H}} = \left\{ \hat{h}_i(x) = \mathbb{E}_{\bar{f}_i} [\bar{f}_i(x)] \mid i \in [r] \right\}$ .

Given any random function  $\bar{f} \in \bar{\mathcal{F}}$  and considering the fact that  $C$  is an  $\epsilon$ -cover for  $\bar{\mathcal{F}}_{|\bar{S}}$  and that  $\bar{f}_{|\bar{S}} \in \bar{\mathcal{F}}_{|\bar{S}}$ , we know there exists  $\bar{f}_i, i \in [r]$  such that

$$d_{TV}^\infty(\bar{f}_{|\bar{S}}, \bar{f}_{|\bar{S}}) = d_{TV}^\infty((\bar{f}_i(\bar{\delta}_{x_1}), \dots, \bar{f}_i(\bar{\delta}_{x_m})), (\bar{f}(\bar{\delta}_{x_1}), \dots, \bar{f}(\bar{\delta}_{x_m}))) \leq \epsilon. \quad (6)$$

From Equation 6 we can conclude that for any  $k \in [m]$ ,  $d_{TV}(\bar{f}_i(\bar{\delta}_{x_k}), \bar{f}(\bar{\delta}_{x_k})) \leq \epsilon$ . Further, for the corresponding  $h, \hat{h}_i \in \mathcal{H}$ , we know that

$$\begin{aligned} \hat{h}_i(x_k) &= \mathbb{E}_{\bar{f}_i} [\bar{f}_i(\bar{\delta}_{x_k})] = \int_{\mathbb{R}^d} x \mathcal{D}(\bar{f}_i(\bar{\delta}_{x_k}))(x) dx, \\ h(x_k) &= \mathbb{E}_{\bar{f}} [\bar{f}(\bar{\delta}_{x_k})] = \int_{\mathbb{R}^d} x \mathcal{D}(\bar{f}(\bar{\delta}_{x_k}))(x) dx. \end{aligned}$$

Denote  $I = \mathcal{D}(\bar{f}(\bar{\delta}_{x_k}))$  and  $\hat{I} = \mathcal{D}(\bar{f}_i(\bar{\delta}_{x_k}))$ . Define two new density functions  $I_{diff}$  and  $\hat{I}_{diff}$  as

$$\begin{aligned} I_{diff}(x) &= \begin{cases} \frac{I(x) - \hat{I}(x)}{d_{TV}(I, \hat{I})} & I(x) \geq \hat{I}(x) \\ 0 & \text{otherwise,} \end{cases} \\ \hat{I}_{diff}(x) &= \begin{cases} \frac{\hat{I}(x) - I(x)}{d_{TV}(I, \hat{I})} & \hat{I}(x) \geq I(x) \\ 0 & \text{otherwise.} \end{cases} \end{aligned}$$



626 Also, we define  $I_{min}$  as

$$I_{min}(x) = \frac{\min\{I(x), \hat{I}(x)\}}{\int \min\{I(x), \hat{I}(x)\} dx} = \frac{\min\{I(x), \hat{I}(x)\}}{1 - d_{TV}(I, \hat{I})}.$$

627 It is easy to verify that

$$\begin{aligned} I(x) &= \left(1 - d_{TV}(I, \hat{I})\right) I_{min}(x) + d_{TV}(I, \hat{I}) \cdot I_{diff}(x) \\ \hat{I}(x) &= \left(1 - d_{TV}(I, \hat{I})\right) I_{min}(x) + d_{TV}(I, \hat{I}) \cdot \hat{I}_{diff}(x). \end{aligned}$$

628 We can then find the  $\ell_2$  distance between  $\hat{h}_i(x_k)$  and  $h(x_k)$  by

$$\begin{aligned} & \left\| \hat{h}_i(x_k) - h(x_k) \right\|_2 \\ &= \left\| \int_{\mathbb{R}^d} x \hat{I}(x) dx - \int_{\mathbb{R}^d} x I(x) dx \right\|_2 \\ &= \left\| \int_{\mathbb{R}^d} x \left[ \left(1 - d_{TV}(I, \hat{I})\right) I_{min}(x) + d_{TV}(I, \hat{I}) \cdot \hat{I}_{diff}(x) \right] \right. \\ & \quad \left. - x \left[ \left(1 - d_{TV}(I, \hat{I})\right) I_{min}(x) + d_{TV}(I, \hat{I}) \cdot I_{diff}(x) \right] dx \right\|_2 \\ &= \left\| \int_{\mathbb{R}^d} x d_{TV}(I, \hat{I}) \left[ \hat{I}_{diff}(x) - I_{diff}(x) \right] dx \right\|_2 \\ &= d_{TV}(I, \hat{I}) \left\| \int_{\mathbb{R}^d} x \left[ \hat{I}_{diff}(x) - I_{diff}(x) \right] dx \right\|_2 \\ &\leq 2B\sqrt{p} d_{TV} \left( \overline{f}(\overline{\delta_{x_k}}), \overline{\hat{f}_i}(\overline{\delta_{x_k}}) \right) \quad (\text{Bounded domain } [-B, B]^p \text{ and triangle inequality}) \\ &\leq 2B\epsilon\sqrt{p}. \end{aligned}$$

629 Since this result holds for any  $k \in [m]$ , we have

$$\left\| \hat{h}_{i|S} - h_{i|S} \right\|_2^\infty = \left\| (\hat{h}_i(x_1), \dots, \hat{h}_i(x_m)) - (h(x_1), \dots, h(x_m)) \right\|_2^\infty \leq 2B\epsilon\sqrt{p}. \quad (7)$$

630 In other words, for any  $h_{i|S} \in \mathcal{H}_{i|S}$  there exists a  $\hat{h}_{i|S} \in \hat{\mathcal{H}}_{i|S}$  such that  $\left\| \hat{h}_{i|S} - h_{i|S} \right\|_2^\infty \leq 2B\epsilon\sqrt{p}$ .

631 Therefore,  $\hat{\mathcal{H}}_{i|S}$  is a  $2B\epsilon\sqrt{p}$  cover for  $\mathcal{H}_{i|S}$  with respect to  $\|\cdot\|_2^\infty$  and  $|\hat{\mathcal{H}}_{i|S}| = r$ .

632 The bound in Equation 7 holds for any subset  $S$  of  $\mathbb{R}^d$  with  $|S| = m$ . Therefore,

$$N_U(2B\epsilon\sqrt{p}, \mathcal{H}, m, \|\cdot\|_2^\infty) \leq N_U(\epsilon, \overline{\mathcal{F}}, m, d_{TV}^\infty, \overline{\Delta_d}). \quad (8)$$

633 Putting Equations 5 and 8 together, we conclude

$$N_U(2B\epsilon\sqrt{p}, \mathcal{H}, m, \|\cdot\|_2^\infty) \leq N_U(\epsilon, \overline{\mathcal{F}}, m, d_{TV}^\infty, \overline{\Delta_d}) \leq N_U(\epsilon, \overline{\mathcal{F}}, m, d_{TV}^\infty, \overline{\mathcal{X}_d}).$$

634 To prove the second part that involves covering number with respect to  $\|\cdot\|_2^{\ell_2}$ , we can follow the same  
635 steps. Similarly, we know that

$$N_U(\epsilon, \overline{\mathcal{F}}, m, d_{TV}^{\ell_2}, \overline{\Delta_d}) = \sup_{\substack{\overline{S} \subset \overline{\Delta_d} \\ |\overline{S}|=m}} \left\{ N(\epsilon, \overline{\mathcal{F}}_{|\overline{S}|}, d_{TV}^{\ell_2}) \right\} \leq \sup_{\substack{\overline{S} \subset \overline{\mathcal{X}_d} \\ |\overline{S}|=m}} \left\{ N(\epsilon, \overline{\mathcal{F}}_{|\overline{S}|}, d_{TV}^{\ell_2}) \right\} = N_U(\epsilon, \overline{\mathcal{F}}, m, d_{TV}^{\ell_2}, \overline{\mathcal{X}_d}).$$

636 Consider the same input sets  $S$  and  $\overline{S}$  and let and let  $\tilde{C} = \{\overline{f}_{1|\overline{S}}, \dots, \overline{f}_{r|\overline{S}} \mid \overline{f}_t \in \overline{\mathcal{F}}, t \in [r]\}$   
637 be an  $\epsilon$ -cover for  $\overline{\mathcal{F}}_{|\overline{S}|}$  with respect to  $d_{TV}^{\ell_2}$ . Define a new set of non-random functions  $\tilde{\mathcal{H}} =$   
638  $\left\{ \tilde{h}_i(x) = \mathbb{E}_{\overline{f}_i} \left[ \tilde{f}_i(x) \right] \mid i \in [r] \right\}$ .

639 Similarly, consider  $f_{i|\overline{S}}$  and  $\tilde{f}_{i|\overline{S}}$  such that

$$d_{TV}^{\ell_2}(\overline{f}_{i|\overline{S}}, \overline{f}_{i|\overline{S}}) = d_{TV}^{\ell_2}((\overline{f}_i(\overline{\delta_{x_1}}), \dots, \overline{f}_i(\overline{\delta_{x_m}})), (\tilde{f}_i(\overline{\delta_{x_1}}), \dots, \tilde{f}_i(\overline{\delta_{x_m}}))) \leq \epsilon.$$

Using the same analysis as before, we can conclude that for any  $k \in [m]$ ,

$$\left\| \tilde{h}_i(x_k) - h(x_k) \right\|_2 \leq 2B\sqrt{p} d_{TV} \left( \bar{f}(\delta_{x_k}), \tilde{f}_i(\delta_{x_k}) \right).$$

We can then conclude that

$$\begin{aligned} & \left\| \tilde{h}_{i|S} - h_{i|S} \right\|_2^{\ell_2} \\ &= \sqrt{\frac{1}{m} \sum_{i=1}^k \left\| \tilde{h}_i(x_k) - h(x_k) \right\|_2^2} \\ &\leq \sqrt{\frac{1}{m} \sum_{i=1}^k (2B\sqrt{p})^2 \left( d_{TV} \left( \bar{f}(\delta_{x_k}), \tilde{f}_i(\delta_{x_k}) \right) \right)^2} \\ &\leq 2B\sqrt{p} \sqrt{\frac{1}{m} \sum_{i=1}^k \left( d_{TV} \left( \bar{f}(\delta_{x_k}), \tilde{f}_i(\delta_{x_k}) \right) \right)^2} \\ &\leq 2B\sqrt{p} d_{TV}^{\ell_2} \left( \bar{f}_{i|S}, \bar{f}_{i|S} \right) \\ &\leq 2B\epsilon\sqrt{p}. \end{aligned}$$

We can then say that  $\tilde{\mathcal{H}}_{i|S}$  is a  $2B\epsilon\sqrt{p}$  cover for  $\mathcal{H}_{i|S}$  with respect to  $\|\cdot\|_2^{\ell_2}$  and  $|\mathcal{H}_{i|S}| = t$ . It follows that

$$N_U(2B\epsilon\sqrt{p}, \mathcal{H}, m, \|\cdot\|_2^{\ell_2}) \leq N_U(\epsilon, \bar{\mathcal{F}}, m, d_{TV}^{\ell_2}, \bar{\Delta}_d) \leq N_U(\epsilon, \bar{\mathcal{F}}, m, d_{TV}^{\ell_2}, \bar{\mathcal{X}}_d).$$

□

## C.2 Proof of Lemma 18

*Proof.* Denote  $\bar{\mathcal{Q}} = \bar{\mathcal{H}} \circ \bar{\mathcal{F}}$ . Consider an input set of random variables  $\bar{S} = \{\bar{x}_1, \dots, \bar{x}_m\} \subset \bar{\mathcal{X}}_d$ . Denote  $r_1 = N(\epsilon, \bar{\mathcal{F}}_{|\bar{S}}, d_{TV}^\infty)$  and let  $\bar{C} = \{\bar{f}_1|_{\bar{S}}, \dots, \bar{f}_{r_1}|_{\bar{S}} \mid \bar{f}_i \in \bar{\mathcal{F}}, i \in [r_1]\}$  be an  $\epsilon$ -cover for  $\bar{\mathcal{F}}_{|\bar{S}}$  with respect to  $d_{TV}^\infty$  and  $\bar{S}' = \{\bar{f}_i(\bar{x}_k) \mid i \in [r_1], k \in [m]\}$ . Clearly,  $|\bar{S}'| \leq mr_1$ . Also, let  $\bar{C}' = \{\bar{h}_1|_{\bar{S}'}, \dots, \bar{h}_{r_2}|_{\bar{S}'} \mid \bar{h}_j \in \bar{\mathcal{H}}, j \in [r_2]\}$  be an  $\epsilon'$ -cover for  $\bar{\mathcal{H}}_{|\bar{S}'}$  with respect to  $d_{TV}^\infty$  metric, where  $r_2 = N(\epsilon', \bar{\mathcal{H}}_{|\bar{S}'}, d_{TV}^\infty)$  is the cardinality of the cover set  $\bar{C}'$ . Denote  $\bar{\mathcal{Q}} = \{\bar{h}_j \circ \bar{f}_i \mid i \in [r_1], j \in [r_2]\}$ . We claim that  $\bar{\mathcal{Q}}_{|\bar{S}}$  is an  $(\epsilon + \epsilon')$ -cover for  $\bar{\mathcal{Q}}_{|\bar{S}}$  with respect to  $d_{TV}^\infty$ . Since the cardinality of  $\bar{\mathcal{Q}}_{|\bar{S}}$  is no more than  $r_1 r_2$ , we can conclude that  $N(\epsilon, \bar{\mathcal{Q}}_{|\bar{S}}, d_{TV}^\infty) \leq N(\epsilon, \bar{\mathcal{F}}_{|\bar{S}}, d_{TV}^\infty) N(\epsilon', \bar{\mathcal{H}}_{|\bar{S}'}, d_{TV}^\infty)$ . Consider  $(\bar{h} \circ \bar{f})|_{\bar{S}} = (\bar{h}(\bar{f}(\bar{x}_1)), \dots, \bar{h}(\bar{f}(\bar{x}_m))) \in \bar{\mathcal{Q}}_{|\bar{S}}$ , where  $\bar{f} \in \bar{\mathcal{F}}$  and  $\bar{h} \in \bar{\mathcal{H}}$ . Since  $\bar{\mathcal{F}}_{|\bar{S}}$  is  $\epsilon$ -covered by  $\bar{C}$ , we know that there exists  $\bar{f}_i \in \bar{\mathcal{F}}$  such that

$$d_{TV}^\infty \left( (\bar{f}_i(\bar{x}_1), \dots, \bar{f}_i(\bar{x}_m)), (\bar{f}(\bar{x}_1), \dots, \bar{f}(\bar{x}_m)) \right) \leq \epsilon.$$

By data processing inequality for total variation distance (Lemma 29), we conclude that  $d_{TV} \left( \bar{h}(\bar{f}_i(\bar{x}_k)), \bar{h}(\bar{f}(\bar{x}_k)) \right) \leq \epsilon$  for  $k \in [m]$ . Therefore,

$$d_{TV}^\infty \left( (\bar{h}(\bar{f}_i(\bar{x}_1)), \dots, \bar{h}(\bar{f}_i(\bar{x}_m))), (\bar{h}(\bar{f}(\bar{x}_1)), \dots, \bar{h}(\bar{f}(\bar{x}_m))) \right) \leq \epsilon. \quad (9)$$

Since  $\bar{f}_i|_{\bar{S}} = (\bar{f}_i(\bar{x}_1), \dots, \bar{f}_i(\bar{x}_m)) \in \bar{C}$ , we know that  $\bar{f}_i(\bar{x}_k) \in \bar{S}'$  for  $k \in [m]$ . We also know that  $\bar{\mathcal{H}}_{|\bar{S}'}$  is  $\epsilon'$ -covered by  $\bar{C}'$ , therefore, there exists  $\bar{h}_j \in \bar{\mathcal{H}}$  such that

$$d_{TV}^\infty \left( (\bar{h}_j(\bar{f}_i(\bar{x}_1)), \dots, \bar{h}_j(\bar{f}_i(\bar{x}_m))), (\bar{h}(\bar{f}_i(\bar{x}_1)), \dots, \bar{h}(\bar{f}_i(\bar{x}_m))) \right) \leq \epsilon' \quad (10)$$

Combining Equations 9 and 10 and by using triangle inequality for total variation distance, we conclude that

$$d_{TV}^\infty \left( (\bar{h}_j(\bar{f}_i(\bar{x}_1)), \dots, \bar{h}_j(\bar{f}_i(\bar{x}_m))), (\bar{h}(\bar{f}(\bar{x}_1)), \dots, \bar{h}(\bar{f}(\bar{x}_m))) \right) \leq \epsilon + \epsilon',$$

661 which suggests that for any  $(\bar{h} \circ \bar{f})|_{\bar{S}} \in \bar{\mathcal{Q}}|_{\bar{S}}$ , there exists  $(\hat{h}_j \circ \hat{f}_i)|_{\bar{S}} \in \bar{\hat{\mathcal{Q}}}|_{\bar{S}}$  such that

$$d_{TV}^\infty \left( (\bar{h} \circ \bar{f})|_{\bar{S}}, (\hat{h}_j \circ \hat{f}_i)|_{\bar{S}} \right) \leq \epsilon + \epsilon'.$$

662 In other words,  $\bar{\mathcal{Q}}|_{\bar{S}}$  is  $(\epsilon + \epsilon')$ -covered by  $\bar{\hat{\mathcal{Q}}}|_{\bar{S}}$ .

663 Let  $N_1 = N_U(\epsilon, \bar{\mathcal{F}}, m, d_{TV}^\infty, \bar{\mathcal{X}}_d)$ . We know that  $mr_1 \leq mN_1$  and, therefore,  $N(\epsilon', \bar{\mathcal{H}}|_{\bar{S}}, d_{TV}^\infty) \leq$   
 664  $N_U(\epsilon', \bar{\mathcal{H}}, mr_1, d_{TV}^\infty, \bar{\mathcal{X}}_d) \leq N_U(\epsilon', \bar{\mathcal{H}}, mN_1, d_{TV}^\infty, \bar{\mathcal{X}}_d)$ . Since the result holds for any input  $\bar{S} \subset \bar{\mathcal{X}}_d$   
 665 of cardinality  $m$  and we know that  $r_1 \leq N_U(\epsilon, \bar{\mathcal{F}}, m, d_{TV}^\infty, \bar{\mathcal{X}}_d)$ , it follows that

$$N_U(\epsilon + \epsilon', \bar{\mathcal{Q}}, m, d_{TV}^\infty, \bar{\mathcal{X}}_d) \leq N_U(\epsilon', \bar{\mathcal{H}}, mN_1, d_{TV}^\infty, \bar{\mathcal{X}}_d) \cdot N_U(\epsilon, \bar{\mathcal{F}}, m, d_{TV}^\infty, \bar{\mathcal{X}}_d).$$

666 The bound for  $\bar{\Delta}_d$  is almost exactly the same as that of  $\bar{\mathcal{X}}_d$ . The only difference is that  $\bar{S} =$   
 667  $\{\bar{\delta}_{x_1}, \dots, \bar{\delta}_{x_m}\} \subseteq \bar{\Delta}_d$ , and we have a uniform  $\epsilon$ -covering number with respect to  $\bar{\Delta}_d$ . We conclude  
 668 that

$$N_U(\epsilon + \epsilon', \bar{\mathcal{H}} \circ \bar{\mathcal{F}}, m, d_{TV}^\infty, \bar{\Delta}_d) \leq N_U(\epsilon', \bar{\mathcal{H}}, mN_2, d_{TV}^\infty, \bar{\mathcal{X}}_d) \cdot N_U(\epsilon, \bar{\mathcal{F}}, m, d_{TV}^\infty, \bar{\Delta}_d).$$

669 The bound with respect to  $d_{TV}^{\ell_2}$  follows the same analysis. Consider a new set  $\bar{S}_z =$   
 670  $\{\bar{\delta}_{z_1}, \dots, \bar{\delta}_{z_m}\} \subset \bar{\Delta}_d$ . Denote  $t_1 = N(\epsilon, \bar{\mathcal{F}}|_{\bar{S}_z}, d_{TV}^{\ell_2})$  and let  $\bar{C}_z = \{\bar{f}_1|_{\bar{S}_z}, \dots, \bar{f}_{t_1}|_{\bar{S}_z} \mid \bar{f}_i \in$   
 671  $\bar{\mathcal{F}}, i \in [t_1]\}$  be an  $\epsilon$ -cover for  $\bar{\mathcal{F}}|_{\bar{S}_z}$  with respect to  $d_{TV}^{\ell_2}$  and  $\bar{S}'_z = \{\bar{f}_i(\bar{\delta}_{z_k}) \mid i \in [t_1], k \in [m]\}$ .  
 672 Clearly,  $|\bar{S}'_z| \leq mt_1$ . Let  $\bar{C}'_z = \{\bar{h}_1|_{\bar{S}'_z}, \dots, \bar{h}_{t_2}|_{\bar{S}'_z} \mid \bar{h}_j \in \bar{\mathcal{H}}, j \in [t_2]\}$  be an  $\epsilon'$ -cover for  $\bar{\mathcal{H}}|_{\bar{S}'_z}$  with  
 673 respect to  $d_{TV}^\infty$  metric, where  $t_2 = N(\epsilon', \bar{\mathcal{H}}|_{\bar{S}'_z}, d_{TV}^\infty)$  is the cardinality of the cover set  $\bar{C}'_z$ . Denote  
 674  $\bar{\mathcal{Q}} = \{\bar{h}_j \circ \bar{f}_i \mid i \in [t_1], j \in [t_2]\}$ . We claim that  $\bar{\mathcal{Q}}|_{\bar{S}_z}$  is an  $(\epsilon + \epsilon')$ -cover for  $\bar{\mathcal{Q}}|_{\bar{S}_z}$  with respect to  
 675  $d_{TV}^{\ell_2}$ . We can then conclude that  $N(\epsilon, \bar{\mathcal{Q}}|_{\bar{S}_z}, d_{TV}^{\ell_2}) \leq N(\epsilon, \bar{\mathcal{F}}|_{\bar{S}_z}, d_{TV}^{\ell_2}) \cdot N(\epsilon', \bar{\mathcal{H}}|_{\bar{S}'_z}, d_{TV}^\infty)$ .

676 Consider  $(\bar{h} \circ \bar{f})|_{\bar{S}_z} = (\bar{h}(\bar{f}(\bar{\delta}_{z_1})), \dots, \bar{h}(\bar{f}(\bar{\delta}_{z_m}))) \in \bar{\mathcal{Q}}|_{\bar{S}_z}$ , where  $\bar{f} \in \bar{\mathcal{F}}$  and  $\bar{h} \in \bar{\mathcal{H}}$ . Since  $\bar{\mathcal{F}}|_{\bar{S}_z}$  is  
 677  $\epsilon$ -covered by  $\bar{C}_z$ , we know that there exists  $\bar{f}_i \in \bar{\mathcal{F}}$  such that

$$\begin{aligned} & d_{TV}^{\ell_2} \left( (\bar{f}_i(\bar{\delta}_{z_1}), \dots, \bar{f}_i(\bar{\delta}_{z_m})), (\bar{f}(\bar{\delta}_{z_1}), \dots, \bar{f}(\bar{\delta}_{z_m})) \right) \\ &= \sqrt{\frac{1}{m} \sum_{k=1}^m \left( d_{TV}(\bar{f}_i(\bar{\delta}_{z_k}), \bar{f}(\bar{\delta}_{z_k})) \right)^2} \leq \epsilon. \end{aligned}$$

678 Similarly, by data processing inequality, we conclude that  $d_{TV} \left( \bar{h}(\bar{f}_i(\bar{\delta}_{z_k})), \bar{h}(\bar{f}(\bar{\delta}_{z_k})) \right) \leq$   
 679  $d_{TV} \left( \bar{f}_i(\bar{\delta}_{z_k}), \bar{f}(\bar{\delta}_{z_k}) \right)$  for  $k \in [m]$ . Therefore,

$$\begin{aligned} & d_{TV}^{\ell_2} \left( (\bar{h}(\bar{f}_i(\bar{\delta}_{z_1})), \dots, \bar{h}(\bar{f}_i(\bar{\delta}_{z_m}))), (\bar{h}(\bar{f}(\bar{\delta}_{z_1})), \dots, \bar{h}(\bar{f}(\bar{\delta}_{z_m}))) \right) \\ &= \sqrt{\frac{1}{m} \sum_{k=1}^m \left( d_{TV}(\bar{h}(\bar{f}_i(\bar{\delta}_{z_k})), \bar{h}(\bar{f}(\bar{\delta}_{z_k}))) \right)^2} \\ &\leq \sqrt{\frac{1}{m} \sum_{k=1}^m \left( d_{TV}(\bar{f}_i(\bar{\delta}_{z_k}), \bar{f}(\bar{\delta}_{z_k})) \right)^2} \leq \epsilon. \end{aligned} \tag{11}$$

680 Now, using the fact that  $\bar{f}_i|_{\bar{S}_z} = (\bar{f}_i(\bar{\delta}_{z_1}), \dots, \bar{f}_i(\bar{\delta}_{z_m})) \in \bar{C}_z$ , we know that  $\bar{f}_i(\bar{\delta}_{z_k}) \in \bar{S}'_z$  for  
 681  $k \in [m]$ . We also know that  $\bar{\mathcal{H}}|_{\bar{S}'_z}$  is  $\epsilon'$ -covered by  $\bar{C}'_z$  with respect to  $d_{TV}^\infty$ . Therefore, there exists  
 682  $\bar{h}_j \in \bar{\mathcal{H}}$  such that

$$d_{TV}^\infty \left( (\bar{h}_j(\bar{f}_i(\bar{\delta}_{z_1})), \dots, \bar{h}_j(\bar{f}_i(\bar{\delta}_{z_m}))), (\bar{h}(\bar{f}_i(\bar{\delta}_{z_1})), \dots, \bar{h}(\bar{f}_i(\bar{\delta}_{z_m}))) \right) \leq \epsilon'. \tag{12}$$

683 From Equation 12 we can conclude that  $d_{TV} \left( (\bar{h}_j(\bar{f}_i(\bar{\delta}_{z_k})), (\bar{h}(\bar{f}_i(\bar{\delta}_{z_k}))) \right) \leq \epsilon'$  for  $k \in [m]$ . Using  
 684 triangle inequality for total variation distance, we can write

$$\begin{aligned} & d_{TV} \left( (\bar{h}_j(\bar{f}_i(\bar{\delta}_{z_k})), (\bar{h}(\bar{f}_i(\bar{\delta}_{z_k}))) \right) \\ & \leq d_{TV} \left( (\bar{h}_j(\bar{f}_i(\bar{\delta}_{z_k})), (\bar{h}(\bar{f}_i(\bar{\delta}_{z_k}))) \right) + d_{TV} \left( \bar{h}(\bar{f}_i(\bar{\delta}_{z_k})), \bar{h}(\bar{f}(\bar{\delta}_{z_k})) \right) \\ & \leq d_{TV} \left( \bar{h}(\bar{f}_i(\bar{\delta}_{z_k})), \bar{h}(\bar{f}(\bar{\delta}_{z_k})) \right) + \epsilon'. \end{aligned} \quad (13)$$

685 We can then conclude that

$$\begin{aligned} & d_{TV}^{\ell_2} \left( (\bar{h}_j(\bar{f}_i(\bar{\delta}_{z_1})), \dots, \bar{h}_j(\bar{f}_i(\bar{\delta}_{z_m}))), (\bar{h}(\bar{f}(\bar{\delta}_{z_1})), \dots, \bar{h}(\bar{f}(\bar{\delta}_{z_m}))) \right) \\ & = \sqrt{\frac{1}{m} \sum_{k=1}^m \left( d_{TV}(\bar{h}_j(\bar{f}_i(\bar{\delta}_{z_k})), \bar{h}(\bar{f}(\bar{\delta}_{z_k}))) \right)^2} \\ & \leq \sqrt{\frac{1}{m} \sum_{k=1}^m \left( d_{TV}(\bar{h}(\bar{f}_i(\bar{\delta}_{z_k})), \bar{h}(\bar{f}(\bar{\delta}_{z_k}))) + \epsilon' \right)^2} \quad (\text{From Equation 13}) \\ & \leq \sqrt{\frac{1}{m} \sum_{k=1}^m \left( d_{TV}(\bar{h}(\bar{f}_i(\bar{\delta}_{z_k})), \bar{h}(\bar{f}(\bar{\delta}_{z_k}))) \right)^2} + \frac{1}{m} \sum_{k=1}^m \epsilon'^2 \\ & \leq \sqrt{\frac{1}{m} \sum_{k=1}^m \left( d_{TV}(\bar{h}(\bar{f}_i(\bar{\delta}_{z_k})), \bar{h}(\bar{f}(\bar{\delta}_{z_k}))) \right)^2} + \sqrt{\frac{1}{m} \sum_{k=1}^m \epsilon'^2} \\ & \leq \epsilon + \epsilon'. \quad (\text{From Equation 11}) \end{aligned}$$

686 As a result,  $\bar{\mathcal{Q}}_{|\bar{S}_z}$  is  $(\epsilon + \epsilon')$ -covered by  $\bar{\mathcal{Q}}_{|\bar{S}_z}$ . Let  $N_3 = N_U(\epsilon, \bar{\mathcal{F}}, m, d_{TV}^{\ell_2}, \bar{\Delta}_d)$ . Since  $mt_1 \leq mN_3$ ,  
 687 we can write  $N(\epsilon', \bar{\mathcal{H}}_{|\bar{S}_z}, d_{TV}^\infty) \leq N_U(\epsilon', \bar{\mathcal{H}}, mt_1, d_{TV}^\infty, \bar{\mathcal{X}}_d) \leq N_U(\epsilon', \bar{\mathcal{H}}, mN_3, d_{TV}^\infty, \bar{\mathcal{X}}_d)$ . We  
 688 know that the result holds for any input  $\bar{S}_z \subset \bar{\Delta}_d$  of cardinality  $m$  and  $t_1 \leq N_U(\epsilon, \bar{\mathcal{F}}, m, d_{TV}^{\ell_2}, \bar{\Delta}_d)$ ,  
 689 therefore, it follows that

$$N_U(\epsilon + \epsilon', \bar{\mathcal{Q}}, m, d_{TV}^{\ell_2}, \bar{\Delta}_d) \leq N_U(\epsilon', \bar{\mathcal{H}}, mN_3, d_{TV}^\infty, \bar{\mathcal{X}}_d) N_U(\epsilon, \bar{\mathcal{F}}, m, d_{TV}^{\ell_2}, \bar{\Delta}_d).$$

690 □

### 691 C.3 TV distance of composition of a class with Gaussian noise class

692 The following lemma, which bounds the total variation distance by Wasserstein distance, is borrowed  
 693 from Chae and Walker (2020).

694 **Lemma 33** (Bounding TV distance by Wasserstein distance). *Given a density function  $K$  over  $\mathbb{R}^d$   
 695 and two probability measures  $\mu, \nu$  over  $\mathcal{X}$  with probability density functions  $I_\mu$  and  $I_\nu$ , respectively,  
 696 the total variation distance can be upper bounded in terms of Wasserstein distance between  $\mu$  and  $\nu$ .*

$$\|K * I_\mu - K * I_\nu\|_1 \leq \sup_{y \neq z} \frac{\|K(x - y) - K(x - z)\|_1}{\|y - z\|_2} d_W(\mu, \nu)$$

697 *Proof.* For any coupling  $\pi$  of  $\mu$  and  $\nu$ , we have

$$K * I_\mu(x) - K * I_\nu(x) = \int (K(x - y) - K(x - z)) d\pi(y, z).$$

Therefore,

$$\begin{aligned}
\|K * (I_\mu - I_\nu)\|_1 &= \int \left| \int ((K(x-y) - K(x-z)) d\pi(y, z) \right| dx \\
&\leq \int \int |(K(x-y) - K(x-z))| d\pi(y, z) dx && \text{(By Jensen's inequality)} \\
&= \int \|K(x-y) - K(x-z)\|_1 d\pi(y, z) && \text{(By Fubini's theorem)} \\
&\leq \sup_{y \neq z} \left\{ \frac{\|K(x-y) - K(x-z)\|_1}{\|y-z\|_2} \right\} \int \|y-z\|_2 d\pi(y, z)
\end{aligned}$$

Since this holds for any coupling  $\pi$  of  $\mu$  and  $\nu$  we conclude that

$$\|K * (I_\mu - I_\nu)\|_1 \leq \sup_{y \neq z} \left\{ \frac{\|K(x-y) - K(x-z)\|_1}{\|y-z\|_2} \right\} d_{\mathcal{W}}(\mu, \nu)$$

□

#### C.4 Proof of Theorem 20

*Proof.* Fix an input set  $\bar{S} = \{\bar{x}_1, \dots, \bar{x}_m\} \subset \mathbb{R}^d$ . Let  $\bar{C} = \{\bar{f}_1|_{\bar{S}}, \dots, \bar{f}_r|_{\bar{S}} : \bar{f}_i \in \bar{\mathcal{F}}, i \in [r]\}$  be an  $\epsilon$ -cover for  $\bar{\mathcal{F}}|_{\bar{S}}$  with respect to  $d_{\mathcal{W}}^\infty$  metric. Denote  $\bar{\mathcal{Q}} = \bar{\mathcal{G}}_\sigma \circ \bar{\mathcal{F}}$ . We define a new class of random functions  $\bar{\hat{\mathcal{Q}}} = \{\bar{g}_\sigma \circ \bar{f}_i \mid i \in [r]\}$ . We show that  $\bar{\mathcal{Q}}|_{\bar{S}}$  is  $(\frac{9\epsilon}{2\sigma})$ -covered by  $\bar{\hat{\mathcal{Q}}}|_{\bar{S}}$  and since  $|\bar{\hat{\mathcal{Q}}}|_{\bar{S}}| = r$ , the result follows.

Let  $I_\sigma$  denote the probability density function of  $\mathcal{N}(\mathbf{0}, \sigma^2 I_d)$ . For any  $\bar{f} \in \bar{\mathcal{F}}$ , we have  $\bar{g}_\sigma(\bar{f}(x)) = \bar{f}(x) + \bar{z}$ , where  $\bar{z}$  is a random variable with probability density function  $I_\sigma$ , therefore, we know that  $\mathcal{D}(\bar{g}_\sigma(\bar{f}(x))) = \mathcal{D}(\bar{f}(x)) * I_\sigma$ .

Given  $(\bar{g}_\sigma \circ \bar{f})|_{\bar{S}} = (\bar{g}_\sigma(\bar{f}(\bar{x}_1)), \dots, \bar{g}_\sigma(\bar{f}(\bar{x}_m))) \in \bar{\mathcal{Q}}|_{\bar{S}}$ , we know that  $\bar{f}|_{\bar{S}} = (\bar{f}(\bar{x}_1), \dots, \bar{f}(\bar{x}_m))$  is in set  $\bar{\mathcal{F}}|_{\bar{S}}$ . Therefore, there exists  $\bar{f}_i \in \bar{\mathcal{F}}$  such that  $d_{\mathcal{W}}^\infty(\bar{f}_i|_{\bar{S}}, \bar{f}|_{\bar{S}}) \leq \epsilon$ , i.e.,

$$d_{\mathcal{W}}^\infty((\bar{f}_i(\bar{x}_1), \dots, \bar{f}_i(\bar{x}_m)), (\bar{f}(\bar{x}_1), \dots, \bar{f}(\bar{x}_m))) \leq \epsilon. \quad (14)$$

From Equation 14, we know that  $d_{\mathcal{W}}(\bar{f}_i(\bar{x}_k), \bar{f}(\bar{x}_k)) \leq \epsilon$  for all  $k \in [m]$ . From Lemma 33, we can conclude that

$$\begin{aligned}
&\frac{1}{2} \left\| I_\sigma * \mathcal{D}(\bar{f}_i(\bar{x}_k)) - I_\sigma * \mathcal{D}(\bar{f}(\bar{x}_k)) \right\|_1 \\
&\leq \frac{1}{2} \left( \sup_{y \neq z} \left\{ \frac{\|I_\sigma(x-y) - I_\sigma(x-z)\|_1}{\|y-z\|_2} \right\} \right) d_{\mathcal{W}}(\bar{f}_i(\bar{x}_k), \bar{f}(\bar{x}_k)) \\
&\leq \frac{\epsilon}{2} \left( \sup_{y \neq z} \left\{ \frac{\|I_\sigma(x-y) - I_\sigma(x-z)\|_1}{\|y-z\|_2} \right\} \right).
\end{aligned} \quad (15)$$

Moreover,  $I_\sigma * \mathcal{D}(\bar{f}_i(\bar{x}_k))$  and  $I_\sigma * \mathcal{D}(\bar{f}(\bar{x}_k))$  are probability density functions of  $\bar{g}_\sigma(\bar{f}_i(\bar{x}_k))$  and  $\bar{g}_\sigma(\bar{f}(\bar{x}_k))$ , respectively. Therefore, from Equation 15,

$$d_{TV}(\bar{g}_\sigma(\bar{f}_i(\bar{x}_k)), \bar{g}_\sigma(\bar{f}(\bar{x}_k))) \leq \frac{\epsilon}{2} \left( \sup_{y \neq z} \left\{ \frac{\|I_\sigma(x-y) - I_\sigma(x-z)\|_1}{\|y-z\|_2} \right\} \right). \quad (16)$$

Since Equation 16 holds for all  $k \in [m]$ , it follows that

$$d_{TV}^\infty(\bar{g}_\sigma(\bar{f}_i(\bar{x}_k)), \bar{g}_\sigma(\bar{f}(\bar{x}_k))) \leq \frac{\epsilon}{2} \left( \sup_{y \neq z} \left\{ \frac{\|I_\sigma(x-y) - I_\sigma(x-z)\|_1}{\|y-z\|_2} \right\} \right).$$

716 This shows that for any  $(\bar{g}_\sigma \circ \bar{f})_{|\bar{S}} \in \bar{\mathcal{Q}}_{|\bar{S}}$  there exists  $(\bar{g}_\sigma \circ \bar{f}_i)_{|\bar{S}} \in \bar{\mathcal{Q}}_{|\bar{S}}$  such that

$$d_{TV}^\infty \left( (\bar{g}_\sigma \circ \bar{f})_{|\bar{S}}, (\bar{g}_\sigma \circ \bar{f}_i)_{|\bar{S}} \right) \leq \frac{\epsilon}{2} \left( \sup_{y \neq z} \left\{ \frac{\|I_\sigma(x-y) - I_\sigma(x-z)\|_1}{\|y-z\|_2} \right\} \right). \quad (17)$$

717 It is only left to bound the supremum term in Equation 17.

718 Based on Theorem 30, we know that for two Gaussian distributions  $\mathcal{N}(\mu_1, \sigma^2 I)$  and  $\mathcal{N}(\mu_2, \sigma^2 I)$   
719 their total variation distance can be bounded by

$$d_{TV}(\mathcal{N}(\mu_1, \sigma^2 I), \mathcal{N}(\mu_2, \sigma^2 I)) \leq \frac{9}{2} \min \left\{ 1, \frac{\|\mu_1 - \mu_2\|_2}{\sigma} \right\}. \quad (18)$$

720 We also know that  $\|I_\sigma(x-y) - I_\sigma(x-z)\|_1 = 2d_{TV}(\mathcal{N}(y, \sigma^2 I), \mathcal{N}(z, \sigma^2 I))$ . Combining Equa-  
721 tions 17 and 18, we can write

$$d_{TV}^\infty \left( (\bar{g}_\sigma \circ \bar{f})_{|\bar{S}}, (\bar{g}_\sigma \circ \bar{f}_i)_{|\bar{S}} \right) \leq \frac{\epsilon}{2} \left( \sup_{y \neq z} \left\{ 9 \frac{\min \left\{ 1, \frac{\|y-z\|_2}{\sigma} \right\}}{\|y-z\|_2} \right\} \right) \leq \frac{9}{2} \frac{\epsilon}{\sigma}. \quad (19)$$

722 From Equation 19 it follows that  $\bar{\mathcal{Q}}_{|\bar{S}}$  is  $(\frac{9\epsilon}{2\sigma})$ -covered by  $\bar{\mathcal{Q}}_{|\bar{S}}$ . Since the result holds for any subset  $\bar{S}$   
723 of  $\bar{\mathcal{X}}_d$  with cardinality  $m$ , we can conclude that

$$N_U \left( \frac{9\epsilon}{2\sigma}, \bar{\mathcal{G}}_\sigma \circ \bar{\mathcal{F}}, m, d_{TV}^\infty, \bar{\mathcal{X}}_d \right) \leq N_U(\epsilon, \bar{\mathcal{F}}, m, d_{\mathcal{W}}^\infty, \bar{\mathcal{X}}_d).$$

724 The second part of the proof is similar. We consider a set of inputs  $\bar{S}_z = \{\bar{\delta}_{z_1}, \dots, \bar{\delta}_{z_m}\} \subset \bar{\Delta}_d$ .  
725 We can then consider an  $\epsilon$ -cover  $\bar{C}_z = \{\bar{f}_1|_{\bar{S}_z}, \dots, \bar{f}_t|_{\bar{S}_z} : \bar{f}_i \in \bar{\mathcal{F}}, i \in [t]\}$  for  $\bar{\mathcal{F}}_{|\bar{S}_z}$ . We will then  
726 construct a class of functions  $\bar{\mathcal{Q}} = \{\bar{g}_\sigma \circ \bar{f}_i \mid i \in [t]\}$  and show that  $\bar{\mathcal{Q}}_{|\bar{S}_z}$  is  $(\frac{9\epsilon}{2\sigma})$ -covered by  
727  $\bar{\mathcal{Q}}_{|\bar{S}_z}$ . The proof follows the same steps as the previous part. Particularly, let  $\bar{f}_i \in \bar{\mathcal{F}}$  be such that  
728  $d_{\mathcal{W}}^\infty(\bar{f}_i|_{\bar{S}_z}, \bar{f}|_{\bar{S}_z}) \leq \epsilon$ . For any  $k \in [m]$ , we can write that

$$\begin{aligned} & \frac{1}{2} \left\| I_\sigma * \mathcal{D}(\bar{f}_i(\bar{\delta}_{z_k})) - I_\sigma * \mathcal{D}(\bar{f}(\bar{\delta}_{z_k})) \right\|_1 \\ & \leq \frac{1}{2} \left( \sup_{y \neq z} \left\{ \frac{\|I_\sigma(x-y) - I_\sigma(x-z)\|_1}{\|y-z\|_2} \right\} \right) d_{\mathcal{W}}(\bar{f}_i(\bar{\delta}_{z_k}), \bar{f}(\bar{\delta}_{z_k})) \\ & \leq \frac{\epsilon}{2} \left( \sup_{y \neq z} \left\{ \frac{\|I_\sigma(x-y) - I_\sigma(x-z)\|_1}{\|y-z\|_2} \right\} \right). \end{aligned} \quad (20)$$

729 Using the same arguments as the previous part, we will have that

$$d_{TV} \left( \bar{g}_\sigma(\bar{f}_i(\bar{\delta}_{z_k})), \bar{g}_\sigma(\bar{f}(\bar{\delta}_{z_k})) \right) \leq \frac{\epsilon}{2} \left( \sup_{y \neq z} \left\{ \frac{\|I_\sigma(x-y) - I_\sigma(x-z)\|_1}{\|y-z\|_2} \right\} \right) \leq \frac{9}{2} \frac{\epsilon}{\sigma}.$$

730 Therefore, we can conclude that for any  $\bar{f} \in \bar{\mathcal{F}}$  there exists  $\bar{f}_i, i \in [t]$  such that

$$d_{TV}^\infty \left( (\bar{g}_\sigma \circ \bar{f})_{|\bar{S}_z}, (\bar{g}_\sigma \circ \bar{f}_i)_{|\bar{S}_z} \right) \leq \frac{9}{2} \frac{\epsilon}{\sigma},$$

731 which means that  $\bar{\mathcal{Q}}_{|\bar{S}_z}$  is  $(\frac{9\epsilon}{2\sigma})$ -covered by  $\bar{\mathcal{Q}}_{|\bar{S}_z}$ . Since the result holds for every  $\bar{S}_z \subset \bar{\Delta}_d$  of  
732 cardinality  $m$ , we can conclude that

$$N_U \left( \frac{9\epsilon}{2\sigma}, \bar{\mathcal{G}}_\sigma \circ \bar{\mathcal{F}}, m, d_{TV}^\infty, \bar{\Delta}_d \right) \leq N_U(\epsilon, \bar{\mathcal{F}}, m, d_{\mathcal{W}}^\infty, \bar{\Delta}_d).$$

733

□

734 **C.5 Proof of Corollary 21**

735 *Proof.* First, from Proposition 16, we can conclude that

$$N_U(\epsilon, \mathcal{F}, d_{\mathcal{W}}^\infty, m, \overline{\Delta_d}) = N_U(\epsilon, \mathcal{F}, m, \|\cdot\|_2^\infty). \quad (21)$$

736 Then, consider an input set  $\overline{S_z} = \{\overline{\delta_{x_1}}, \dots, \overline{\delta_{x_m}}\} \subset \overline{\Delta_d}$ . Let  $\overline{C_z} = \{\hat{f}_{1|\overline{S_z}}, \dots, \hat{f}_{r|\overline{S_z}} \mid \hat{f}_i \in \mathcal{F}, i \in [r]\}$  be an  $\epsilon$ -cover for  $\mathcal{F}_{|\overline{S_z}}$  with respect to  $d_{\mathcal{W}}^\infty$ , then for a given  $f_{|\overline{S_z}} \in \mathcal{F}_{|\overline{S_z}}$  and  $\hat{f}_{i|\overline{S_z}} \in \overline{C_z}$ , where  
 738  $d_{\mathcal{W}}^\infty(f_{|\overline{S_z}}, \hat{f}_{i|\overline{S_z}}) \leq \epsilon$ , from Equations 15 and 19, we know that for all  $k \in [m]$

$$\begin{aligned} d_{TV}(\overline{g_\sigma}(\hat{f}_i(\overline{\delta_{x_k}})), \overline{g_\sigma}(f(\overline{\delta_{x_k}}))) &= d_{TV}(\mathcal{N}(\hat{f}_i(x_k), \sigma^2 I_p), \mathcal{N}(f(x_k), \sigma^2 I_p)) \\ &\leq \frac{9}{2} \min \left\{ 1, \frac{\|\hat{f}_i(x_k) - f(x_k)\|_2}{\sigma} \right\} \leq \frac{9}{2} \frac{d_{\mathcal{W}}(\hat{f}_i(\overline{\delta_{x_k}}), f(\overline{\delta_{x_k}}))}{\sigma} \\ &\leq \frac{9\epsilon}{2\sigma}. \end{aligned}$$

739 Therefore, we can conclude that

$$\begin{aligned} d_{TV}^\infty((\overline{g_\sigma} \circ \hat{f}_i)_{|\overline{S_z}}, (\overline{g_\sigma} \circ f)_{|\overline{S_z}}) \\ &= d_{TV}^\infty((\overline{g_\sigma}(\hat{f}_i(\overline{\delta_{x_1}})), \dots, \overline{g_\sigma}(\hat{f}_i(\overline{\delta_{x_m}}))), (\overline{g_\sigma}(f(\overline{\delta_{x_1}})), \dots, \overline{g_\sigma}(f(\overline{\delta_{x_m}})))) \\ &\leq \frac{9}{2} \frac{\epsilon}{\sigma}, \end{aligned}$$

740 It follows that for any  $(\overline{g_\sigma} \circ f)_{|\overline{S_z}} \in (\overline{\mathcal{G}_\sigma} \circ \mathcal{F})_{|\overline{S_z}}$ , there exists  $\hat{f}_{i|\overline{S_z}} \in \overline{C_z}$  such that  
 741  $d_{TV}^\infty((\overline{g_\sigma} \circ \hat{f}_i)_{|\overline{S_z}}, (\overline{g_\sigma} \circ f)_{|\overline{S_z}}) \leq \frac{9\epsilon}{2\sigma}$ . Therefore,

$$N(\frac{9\epsilon}{2\sigma}, (\overline{\mathcal{G}_\sigma} \circ \mathcal{F})_{|\overline{S_z}}, d_{TV}^\infty) \leq N(\epsilon, \mathcal{F}_{|\overline{S_z}}, d_{\mathcal{W}}^\infty).$$

742 Since this results holds for any  $\overline{S_z} \subset \overline{\Delta_d}$ , we can conclude that

$$N_U(\frac{9\epsilon}{2\sigma}, \overline{\mathcal{G}_\sigma} \circ \mathcal{F}, m, d_{TV}^\infty, \overline{\Delta_d}) \leq N_U(\epsilon, \mathcal{F}, m, d_{\mathcal{W}}^\infty, \overline{\Delta_d}) = N_U(\epsilon, \mathcal{F}, m, \|\cdot\|_2^\infty).$$

743 The proof of the second part again follows from Proposition 16. We can write that

$$N_U(\epsilon, \mathcal{F}, d_{\mathcal{W}}^{\ell_2}, m, \overline{\Delta_d}) = N_U(\epsilon, \mathcal{F}, m, \|\cdot\|_2^{\ell_2}).$$

744 Consider the input set  $\overline{S_z} \subset \overline{\Delta_d}$  as defined above and let  $\tilde{\overline{C_z}} = \{\tilde{f}_{1|\overline{S_z}}, \dots, \tilde{f}_{t|\overline{S_z}} \mid \tilde{f}_i \in \mathcal{F}, i \in [t]\}$   
 745 be an  $\epsilon$ -cover for  $\mathcal{F}_{|\overline{S_z}}$  with respect to  $d_{\mathcal{W}}^{\ell_2}$ . Now, for a given  $f_{|\overline{S_z}} \in \mathcal{F}_{|\overline{S_z}}$  and the corresponding  
 746  $\tilde{f}_{i|\overline{S_z}} \in \tilde{\overline{C_z}}$ , where  $d_{\mathcal{W}}^{\ell_2}(f_{|\overline{S_z}}, \tilde{f}_{i|\overline{S_z}}) \leq \epsilon$ , we know that for all  $k \in [m]$

$$\begin{aligned} d_{TV}(\overline{g_\sigma}(\tilde{f}_i(\overline{\delta_{x_k}})), \overline{g_\sigma}(f(\overline{\delta_{x_k}}))) &= d_{TV}(\mathcal{N}(\tilde{f}_i(x_k), \sigma^2 I_p), \mathcal{N}(f(x_k), \sigma^2 I_p)) \\ &\leq \frac{9}{2} \min \left\{ 1, \frac{\|\tilde{f}_i(x_k) - f(x_k)\|_2}{\sigma} \right\} \leq \frac{9}{2} \frac{d_{\mathcal{W}}(\tilde{f}_i(\overline{\delta_{x_k}}), f(\overline{\delta_{x_k}}))}{\sigma}. \end{aligned}$$

747 Therefore,

$$\begin{aligned} d_{TV}^{\ell_2}((\overline{g_\sigma} \circ \tilde{f}_i)_{|\overline{S_z}}, (\overline{g_\sigma} \circ f)_{|\overline{S_z}}) \\ &= \sqrt{\frac{1}{m} \sum_{k=1}^m \left( d_{TV}(\overline{g_\sigma}(\tilde{f}_i(\overline{\delta_{x_k}})), \overline{g_\sigma}(f(\overline{\delta_{x_k}}))) \right)^2} \\ &\leq \sqrt{\frac{1}{m} \sum_{k=1}^m \frac{\left( 9 d_{\mathcal{W}}(\tilde{f}_i(\overline{\delta_{x_k}}), f(\overline{\delta_{x_k}})) \right)^2}{(2\sigma)^2}} \\ &\leq \frac{9}{2\sigma} d_{\mathcal{W}}^{\ell_2}(\tilde{f}_{i|S_z}, f_{|S_z}) \leq \frac{9}{2} \frac{\epsilon}{\sigma}. \end{aligned}$$

Therefore, for any  $(\bar{g}_\sigma \circ f)|_{\bar{S}_z} \in (\bar{\mathcal{G}}_\sigma \circ \mathcal{F})|_{\bar{S}_z}$ , there exists  $\tilde{f}_i|_{\bar{S}_z} \in \bar{C}_z$  such that  $d_{TV}^{\ell_2} \left( (\bar{g}_\sigma \circ \tilde{f}_i)|_{\bar{S}_z}, (\bar{g}_\sigma \circ f)|_{\bar{S}_z} \right) \leq \frac{9\epsilon}{2\sigma}$ . As a result,

$$N\left(\frac{9\epsilon}{2\sigma}, (\bar{\mathcal{G}}_\sigma \circ \mathcal{F})|_{S_z}, d_{TV}^{\ell_2}\right) \leq N(\epsilon, \mathcal{F}|_{S_z}, d_{\mathcal{W}}^{\ell_2}).$$

Since this results holds for any  $\bar{S}_z \subset \bar{\Delta}_d$ , we can conclude that

$$N_U\left(\frac{9\epsilon}{2\sigma}, \bar{\mathcal{G}}_\sigma \circ \mathcal{F}, m, d_{TV}^{\ell_2}, \bar{\Delta}_d\right) \leq N_U(\epsilon, \mathcal{F}, m, d_{\mathcal{W}}^{\ell_2}, \bar{\Delta}_d) = N_U(\epsilon, \mathcal{F}, m, \|\cdot\|_2^{\ell_2}).$$

751

□

## 752 C.6 Proof of Theorem 22

*Proof.* Let  $\bar{\mathcal{Q}} = \bar{\mathcal{G}}_\sigma \circ \mathcal{F}$  and  $\bar{\mathcal{Z}} = \bar{\mathcal{G}}_\sigma \circ \bar{\mathcal{X}}_{B,d}$ . Denote by  $r = N_U(\epsilon, \mathcal{F}, \infty, \|\cdot\|_2^\infty)$ . Let  $C = \{\hat{f}_i(x) \mid \hat{f}_i \in \mathcal{F}, \forall x \in \mathbb{R}^d, i \in [r]\}$  be a global  $\epsilon$ -cover for  $\mathcal{F}$  with respect to  $\|\cdot\|_2$  metric. We will show that for all  $(\bar{g}_\sigma \circ f)|_{\bar{\mathcal{Z}}}$ ,  $f \in \mathcal{F}$ , there exists  $\hat{f}_i \in C$  such that  $d_{TV}^\infty \left( (\bar{g}_\sigma \circ f)|_{\bar{\mathcal{Z}}}, (\bar{g}_\sigma \circ \hat{f}_i)|_{\bar{\mathcal{Z}}} \right) \leq \frac{9\epsilon}{2\sigma}$ . Clearly,  $|C| \leq r$  and the result follows.

For any  $\bar{x} \in \bar{\mathcal{X}}_{B,d}$  and its smoothed version  $\bar{z} \in \bar{\mathcal{Z}}$  with probability density function  $I_z$ , from Lemma 56, we know that we can estimate  $I_z$  by a mixture  $\bar{h} = \sum_{i=1}^m w_i g_i$  of  $m = \lceil \frac{B}{\eta} \rceil^d$  Gaussian random variables with covariance matrix  $\sigma^2 I_d$  and means as defined in Equation 43 such that  $d_{TV}(\bar{h}, \bar{z}) \leq 18\sqrt{d}\eta/\sigma$ . Let  $\bar{\mathcal{H}}$  denote the set containing all mixtures of this kind.

Since  $C$  covers the restriction of  $\mathcal{F}$  to  $\mathbb{R}^d$ , for any  $f \in \mathcal{F}$ , there exists  $\hat{f}_i$  such that  $\|f(x) - \hat{f}_i(x)\|_2 \leq \epsilon$  for every  $x \in \mathbb{R}^d$ . Next, for the coupling  $\pi^*(f(\bar{h}), \hat{f}_i(\bar{h}))$  as defined in Notations we can write

$$\int_{\mathbb{R}^d \times \mathbb{R}^d} \|x - y\|_2 d\pi^*(x, y) \leq \epsilon \int_{\mathbb{R}^d \times \mathbb{R}^d} d\pi^*(x, y) \leq \epsilon,$$

which comes from the fact that  $\hat{f}_i$  is “globally close” to  $f$  with respect to  $\|\cdot\|_2$  distance. We, therefore, know that

$$d_{\mathcal{W}}(f(\bar{h}), \hat{f}_i(\bar{h})) = \inf_{\pi \in \Pi(f(\bar{h}), \hat{f}_i(\bar{h}))} \int_{\mathbb{R}^d \times \mathbb{R}^d} \|x - y\|_2 d\pi(x, y) \leq \int_{\mathbb{R}^d \times \mathbb{R}^d} \|x - y\|_2 d\pi^*(x, y) \leq \epsilon.$$

Since this holds for any  $\bar{h} \in \bar{\mathcal{H}}$ , we can conclude that

$$d_{\mathcal{W}}^\infty \left( f|_{\bar{\mathcal{H}}}, \hat{f}_i|_{\bar{\mathcal{H}}} \right) \leq \epsilon.$$

Next, from the arguments in Theorem 20, we know that

$$d_{TV}^\infty \left( (\bar{g}_\sigma \circ f)|_{\bar{\mathcal{H}}}, (\bar{g}_\sigma \circ \hat{f}_i)|_{\bar{\mathcal{H}}} \right) \leq \frac{9}{2\sigma} d_{\mathcal{W}}^\infty \left( f|_{\bar{\mathcal{H}}}, \hat{f}_i|_{\bar{\mathcal{H}}} \right) \leq \frac{9\epsilon}{2\sigma}.$$

We can now say that for any  $\bar{z} \in \bar{\mathcal{Z}}$  and the  $\bar{h} \in \bar{\mathcal{H}}$  that estimates it with respect to total variation distance, we have

$$\begin{aligned} & d_{TV} \left( \bar{g}_\sigma(f(\bar{z})), \bar{g}_\sigma(\hat{f}_i(\bar{z})) \right) \\ & \leq d_{TV} \left( \bar{g}_\sigma(f(\bar{z})), \bar{g}_\sigma(f(\bar{h})) \right) + d_{TV} \left( \bar{g}_\sigma(f(\bar{h})), \bar{g}_\sigma(\hat{f}_i(\bar{h})) \right) + d_{TV} \left( \bar{g}_\sigma(\hat{f}_i(\bar{h})), \bar{g}_\sigma(\hat{f}_i(\bar{z})) \right) \\ & \leq 36\sqrt{d}\eta/\sigma + \frac{9\epsilon}{2\sigma}. \end{aligned}$$

where we used triangle and data processing inequalities for total variation distance. Setting  $\eta = \epsilon/8\sqrt{d}$  we have  $d_{TV} \left( \bar{g}_\sigma(f(\bar{z})), \bar{g}_\sigma(\hat{f}_i(\bar{z})) \right) \leq 9\epsilon/\sigma$ .

Since we have this result for every  $\bar{h} \in \bar{\mathcal{H}}$ , we know that for any  $\bar{z} \in \bar{\mathcal{Z}}$ ,

$$d_{TV}^\infty \left( (\bar{g}_\sigma \circ f)|_{\bar{\mathcal{Z}}}, (\bar{g}_\sigma \circ \hat{f}_i)|_{\bar{\mathcal{Z}}} \right) \leq \frac{9\epsilon}{\sigma},$$



772 which is exactly what we wanted to prove. Therefore, the size of the TV cover for  $\overline{\mathcal{G}_\sigma} \circ \mathcal{F}$  can be  
 773 bounded by the size of  $\|\cdot\|_2$  cover of  $\mathcal{F}$

$$N_U\left(\frac{9\epsilon}{\sigma}, \overline{\mathcal{G}_\sigma} \circ \mathcal{F}, \infty, d_{TV}^\infty, \overline{\mathcal{G}_\sigma} \circ \overline{\mathcal{X}_{B,d}}\right) \leq N_U(\epsilon, \mathcal{F}, \infty, \|\cdot\|_2^\infty).$$

774

□

## 775 D Proofs of lemmas in Section 6

776 **Notation.** For a vector  $V \in \mathbb{R}^d$ , we denote its angle by  $\angle V$ . By  $\angle(V_1, V_2)$ , we are referring to  
 777 the angle between two vectors  $V_1$  and  $V_2$ . Also, we denote by  $1\{x = a\}$  the indicator function that  
 778 outputs 1 if  $x = a$  and 0 if  $x \neq a$ . We also denote by  $\langle V_1, V_2 \rangle$  the inner product between  
 779 vectors  $V_1$  and  $V_2$ . We denote by  $\mathcal{D}(\bar{x})$  the probability density functions of the random variable  
 780  $\bar{x}$ . For two Borel functions  $f_1$  and  $f_2$ , we denote by  $\pi^*(f_1(\bar{x}), f_2(\bar{x}))$  a coupling between random  
 781 variables  $f_1(\bar{x}), f_2(\bar{x})$  such that

$$\mathcal{M}_{\pi^*}(A) = \begin{cases} \mathcal{M}_{\bar{x}}(B) & \exists B \subset \mathcal{B}(\mathcal{X}) \text{ such that } A = f_1(B) \times f_2(B) \\ 0 & \text{otherwise,} \end{cases}$$

782 where  $\mathcal{B}(\mathcal{X})$  is the set of all Borel sets over  $\mathcal{X}$ ,  $\mathcal{M}_{\pi^*}(A)$  is the measure that  $\pi^*$  assigns to the Borel  
 783 set  $A$ , and  $\mathcal{M}_{\bar{x}}(B)$  is the measure that random variable  $\bar{x}$  assigns to Borel set  $B$ . We also denote by  
 784  $\text{Ball}_d(x, R)$  the  $d$  dimensional ball of radius  $R$  centered at  $x$ .

### 785 D.1 Proof of Theorem 25

786 In the following we state a stronger version of Theorem 25 which presents a uniform covering number  
 787 bound for neural network classes that have a general activation function that is Lipschitz continuous,  
 788 monotone, and has a bounded domain.

789 **Theorem 34** (Stronger version of Theorem 25). *Consider the class  $\text{NET}[d, p]$  of a single-layers neu-*  
 790 *ral network, where the activation function is Lipschitz continuous with Lipschitz factor  $L$ , monotone,*  
 791 *and has a bounded output in  $[-B, B]^p$ . The global covering number of  $\overline{\mathcal{G}_\sigma} \circ \text{NET}[d, p]$  with respect*  
 792 *to total variation distance is bounded by*

$$\begin{aligned} & N_U(\epsilon, \overline{\mathcal{G}_\sigma} \circ \text{NET}[d, p], \infty, d_{TV}^\infty, \overline{\mathcal{G}_\sigma} \circ \overline{\mathcal{X}_{B,d}}) \\ & \leq \left( \frac{10\sqrt{10}(4+B)^{3/2} d^{5/2} L \sqrt{Bu}}{(2\pi)^{1/4} \epsilon^{3/2} \sigma^2} \ln \left( \frac{5(4+B)Bd}{\epsilon\sigma} \right) \right)^{p(d+1)}, \end{aligned}$$

793 where  $u = \max \{ |\phi^{-1}(B - \sigma\epsilon/(5(4+B)d))|, |\phi^{-1}(-B + \sigma\epsilon/(5(4+B)d))| \}$ .

794 Note that Theorem 25 is a special case of the above theorem where the activation function is the  
 795 sigmoid function with Lipschitz continuity factor of 1 and a bounded domain in  $[0, 1]^p$ . In the case of  
 796 sigmoid function, we can also conclude that

$$\begin{aligned} u &= \max \{ |\phi^{-1}(1 - \epsilon\sigma/(5(4+B)d))|, |\phi^{-1}(\epsilon\sigma/(5(4+B)d))| \} \\ &= |\phi^{-1}(1 - \epsilon\sigma/(5(4+B)d))| \\ &= \ln((5(4+B)d - \epsilon\sigma)/(\epsilon\sigma)) \\ &\leq \ln((30d - \epsilon\sigma)/(\epsilon\sigma)). \end{aligned}$$

797 *Proof.* We bound the global covering number of class  $\text{NET}[d, p] = \{f : \mathbb{R}^d \rightarrow \mathbb{R}^p \mid f(x) =$   
 798  $\Phi(W^\top x)\}$  with respect to Wasserstein distance by constructing a grid for the weights  $V_i \in \mathbb{R}^d$   
 799 in  $W^\top = [V_1^\top \dots V_p^\top]$ . Then, we find the TV covering number using Theorem 20. To do so,  
 800 we consider two cases for each  $V_i$  based on its  $\ell_2$  norm. In case  $\|V_i\|_2 \leq B_v$ , we construct the  
 801 grid based on  $\|V_i\|_2$  and its angle, while for the case that  $\|V_i\|_2 > B_v$ , we prove that only a  
 802 grid on the angle of  $V_i$  is sufficient. Further, we choose  $B_v$  based on  $\epsilon$  and  $\sigma$ . We then show  
 803 that for each matrix  $W^\top = [V_1^\top \dots V_p^\top]$ , there exists  $\hat{W}^\top = [\hat{V}_1^\top \dots \hat{V}_p^\top]$  in the grid such that  
 804  $d_{\mathcal{W}}(\Phi(W^\top \bar{x}), \Phi(\hat{W}^\top \bar{x}))$  is bounded for all  $\bar{x} \in \overline{\mathcal{G}_\sigma} \circ \overline{\mathcal{X}_{B,d}}$ .

805 Denote  $r = \lceil \frac{2B_v}{\delta} \rceil$  and

$$A = \{-B_v + i\delta \mid i \in [r]\}^d. \quad (22)$$

806 Define a new set

$$A_S = \left\{ (a_1, \dots, a_d) \in A \mid \left( \sum_{i=1}^d 1\{a_i = B_v\} + \sum_{i=1}^d 1\{a_i = -B_v\} \right) \geq 1 \right\}.$$

807 Informally,  $A_S$  is the grid of points on sides of a  $d$ -dimensional hypercube. For any point  $b =$   
808  $(b_1, \dots, b_d) \in A_S$ , we define the following set of vectors

$$P_b = \left\{ \frac{i\zeta}{B_v} [b_1 \dots b_d] \in \mathbb{R}^d \mid i \in \left[ \lceil \frac{B_v}{\zeta} \rceil \right] \right\}.$$

809 Note that the way we defined  $A_S$  in Equation 22, implies that for any  $(b_1, \dots, b_d) \in A_S$ , there exists  
810 at least one  $b_i$  such that  $|b_i| = B_v$ . Therefore, whenever  $i = \lceil \frac{B_v}{\zeta} \rceil$ , we know that  $\| \frac{i\zeta}{B_v} [b_1 \dots b_d] \|_2 \geq$   
811  $B_v$ .

812 Now, we can define the grid of vectors  $V \in \mathbb{R}^d$  in the following way

$$C = \bigcup_{b \in A_S} P_b.$$

813 Informally speaking, we are discretizing the norms in  $\lceil \frac{B_v}{\zeta} \rceil$  values and then for each vector from  
814 origin to grid points on the sides of the hypercube, we use  $\lceil \frac{B_v}{\zeta} \rceil$  vectors with the same angle and  
815 different norms as our grid. Clearly, the size of grid  $|C|$  is upper bounded by  $\lceil \frac{B_v}{\zeta} \rceil \lceil \frac{2B_v}{\delta} \rceil^d$ .

816 Next, we turn into proving that given any vector  $V$  in  $\mathbb{R}^d$ , there exists a vector  $\hat{V}$  in  $C$  such that for  
817 any  $\bar{z} \in \overline{\mathcal{G}_\sigma} \circ \overline{\mathcal{X}_{B,d}}$ ,  $d_{\mathcal{W}}(\Phi(V^\top \bar{z}), \Phi(\hat{V}^\top \bar{z})) \leq (3 + 2\sqrt{2})\epsilon$ .

818 **Case 1.** In this case, we consider vectors  $V \in \mathbb{R}^d$  such that  $\|V\|_2 \leq B_v$ . The way that we  
819 constructed the set of vectors  $C$  implies that given any vector there exists a  $b \in A_S$  and the set  
820 of aligned vectors  $P_b$  such that the angle between  $V$  and vectors in set  $P_b$  can be bounded. More  
821 specifically, for any  $V' \in P_b$ , we know that

$$\angle(V, V') \leq \arcsin \frac{\delta}{B_v}.$$

822 since  $\arcsin$  is a monotone increasing functions over  $[-1, 1]$  and we know that  $\|[b_1 \dots b_d]\|_2 \geq B_v$ .  
823 Let  $\theta = \arcsin \frac{\delta}{B_v}$ . Moreover, since  $\|V\|_2 \leq B_v$ , we know that there exists  $\hat{V} \in P_b$  such that

$$\left| \|V\|_2 - \|\hat{V}\|_2 \right| \leq \frac{\zeta}{B_v} \|[b_1 \dots b_d]\|_2 \leq \frac{\zeta}{B_v} \sqrt{d} B_v \leq \sqrt{d} \zeta.$$

824 Without loss of generality, let  $\|V\|_2 \leq \|\hat{V}\|_2$ . We can then write

$$\frac{\|\hat{V}\|_2}{\|V\|_2} \leq 1 + \frac{\sqrt{d}\zeta}{\|V\|_2}$$

825 Denote  $\hat{V}_\perp = \|\hat{V}\|_2 \sin(\angle(V, \hat{V})) V_\perp$  and  $\hat{V}_\parallel = \|\hat{V}\|_2 \cos(\angle(V, \hat{V})) \frac{V}{\|V\|_2}$ , where  $V_\perp$  is a normalized  
826 vector orthogonal to  $V$ . Denote  $B_z = (B + \sigma)\sqrt{d} + \sigma\sqrt{2 \ln \frac{B}{\epsilon}}$ . For any  $x \in \mathbb{R}^d$  such that  $\|x\|_2 \leq B_z$ ,

827 we can write

$$\begin{aligned}
\langle \hat{V}, x \rangle &= \langle \hat{V}_\perp, x \rangle + \langle \hat{V}_\parallel, x \rangle = \langle \hat{V}_\perp, x \rangle + \langle V, x \rangle \frac{\|\hat{V}_\parallel\|_2}{\|V\|_2} \\
&= \|\hat{V}_\perp\|_2 \|x\|_2 \cos(\angle(\hat{V}_\perp, x)) + \langle V, x \rangle \frac{\|\hat{V}_\parallel\|_2}{\|V\|_2} \\
&\leq \|\hat{V}_\perp\|_2 \|x\|_2 + \langle V, x \rangle \frac{\|\hat{V}_\parallel\|_2}{\|V\|_2} \\
&\leq \|\hat{V}\|_2 \|x\|_2 \sin(\angle(V, \hat{V})) + \langle V, x \rangle \frac{\|\hat{V}\|_2 \cos(\angle(V, \hat{V}))}{\|V\|_2} \\
&\leq \|\hat{V}\|_2 \|x\|_2 \frac{\delta}{B_v} + \langle V, x \rangle \frac{\|\hat{V}\|_2}{\|V\|_2} \\
&\leq \sqrt{d} B_v \|x\|_2 \frac{\delta}{B_v} + \langle V, x \rangle (1 + \frac{\sqrt{d}\zeta}{\|V\|_2}).
\end{aligned}$$

828 Therefore, we can conclude that

$$\begin{aligned}
\langle \hat{V}, x \rangle - \langle V, x \rangle &\leq \sqrt{d} B_v \|x\|_2 \frac{\delta}{B_v} + \|V\|_2 \|x\|_2 \left( \frac{\sqrt{d}\zeta}{\|V\|_2} \right) \\
&\leq (\sqrt{d}\delta + \sqrt{d}\zeta) \|x\|_2 \\
&\leq (\sqrt{d}\delta + \sqrt{d}\zeta) \left( (B + \sigma)\sqrt{d} + \sigma\sqrt{2\ln \frac{B}{\epsilon}} \right).
\end{aligned} \tag{23}$$

829 Now, for any  $\bar{z} \in \overline{\mathcal{G}_\sigma} \circ \overline{\mathcal{X}_{B,d}}$ , by Lemma 56, we know that we can find a mixture of  $m = \lceil \frac{B}{\eta} \rceil^d$   
830  $d$  dimensional Gaussians random variables  $\bar{h} = \sum_{i=1}^m w_i g_i$  with bounded means in  $[-B, B]^d$  and  
831 covariance matrices  $\sigma^2 I_d$  such that  $d_{TV}(\bar{h}, \bar{z}) \leq 18\sqrt{d}\eta/\sigma$ . Let  $\mathcal{H}$  be the class of all such mixtures.

832 From Lemma 32, we know that

$$\mathbb{P} \left[ \|x\|_2^2 \geq (B + \sigma)\sqrt{d} + \sigma\sqrt{2t} \right] \leq e^{-t}. \tag{24}$$

833 Setting  $t = \ln \frac{B}{\epsilon}$  and  $\delta = \zeta = \epsilon/(2dL \ln \frac{B}{\epsilon})$ , we can conclude that

$$\mathbb{P} [\|x\|_2 \geq B_z] = \mathbb{P} \left[ \|x\|_2 \geq (B + \sigma)\sqrt{d} + \sigma\sqrt{2\ln \frac{B}{\epsilon}} \right] \leq \frac{\epsilon}{B}. \tag{25}$$

834 Therefore, from Equations 23 and 25, we can conclude that for the random variable  $\bar{h} = \sum_{i=1}^m w_i g_i$   
835 with  $\mathcal{D}(h) = I_h$  and for the coupling  $\pi^* \left( \phi(V^\top \bar{h}), \phi(\hat{V}^\top \bar{h}) \right)$  as defined in notations we can write

$$\begin{aligned}
&\int_{\mathbb{R}^d \times \mathbb{R}^d} \|\phi(V^\top \bar{h}) - \phi(\hat{V}^\top \bar{h})\|_2 d\pi^* \left( \phi(V^\top \bar{h}), \phi(\hat{V}^\top \bar{h}) \right) \\
&\leq \int_{Ball_d(0, B_z)} L\sqrt{d}(\delta + \zeta) \left( (B + \sigma)\sqrt{d} + \sigma\sqrt{2\ln \frac{B}{\epsilon}} \right) dI_h \\
&\quad + \int_{\mathbb{R}^d \setminus Ball_d(0, B_z)} 2B dI_h \\
&\leq \frac{(B + \sigma)\epsilon}{2\ln \frac{B}{\epsilon}} + \frac{\epsilon\sigma}{\sqrt{2d\ln \frac{B}{\epsilon}}} + 2\epsilon,
\end{aligned} \tag{26}$$

836 where we used the fact that for any  $x \in \mathbb{R}^d$ , we know that  $\|V^\top x - \hat{V}^\top x\|_2$  is bounded and the  
837 activation function  $\phi(x)$  is Lipschitz continuous with Lipschitz constant  $L$ . Here, we assume that  
838 the variance of noise is always smaller than 1, i.e.,  $\sigma \leq 1$ . We know that  $d \geq 1$  and assuming that  
839  $\ln \frac{B}{\epsilon} \geq 1$  (\*), we can rewrite Equation 26 as

$$\int_{\mathbb{R}^d \times \mathbb{R}^d} \|\phi(V^\top \bar{h}) - \phi(\hat{V}^\top \bar{h})\|_2 d\pi^* \left( \phi(V^\top \bar{h}), \phi(\hat{V}^\top \bar{h}) \right) \leq (B + 1)\epsilon + \epsilon + 2\epsilon \leq (B + 4)\epsilon,$$

840 Then, we have

$$\begin{aligned} d_{\mathcal{W}}\left(\phi(V^\top \bar{h}), \phi(\hat{V}^\top \bar{h})\right) &= \inf_{\pi \in \Pi(\phi(V^\top \bar{h}), \phi(\hat{V}^\top \bar{h}))} \int_{\mathbb{R}^d \times \mathbb{R}^d} \|\phi(V^\top \bar{h}) - \phi(\hat{V}^\top \bar{h})\|_2 d\pi\left(\phi(V^\top \bar{h}), \phi(\hat{V}^\top \bar{h})\right) \\ &\leq \int_{\mathbb{R}^d \times \mathbb{R}^d} \|\phi(V^\top \bar{h}) - \phi(\hat{V}^\top \bar{h})\|_2 d\pi^*\left(\phi(V^\top \bar{h}), \phi(\hat{V}^\top \bar{h})\right) \leq (B+4)\epsilon. \end{aligned}$$

841 Therefore, we have proved that for any  $V \in \mathbb{R}^d$  such that  $\|V\|_2 \leq B_v$ , there exists a vector  $\hat{V}$  in  $C$   
842 such that for any  $\bar{z} \in \overline{\mathcal{G}_\sigma} \circ \mathcal{X}_{B,d}$  and its estimation with a mixture  $\bar{h}$  of Gaussian random variables,  
843 we have

$$d_{\mathcal{W}}\left(\phi(V^\top \bar{h}), \phi(\hat{V}^\top \bar{h})\right) \leq (B+4)\epsilon.$$

844 **Case 2** Now, we turn to analyze the case where we have vectors  $V$  in  $\mathbb{R}^d$  such that  $\|V\|_2 > B_v$ .  
845 We assume that the function  $\phi$  is invertible. Taking into account that  $\phi$  is also bounded in  $[-B, B]$ ,  
846 denote  $u = \max\{|\phi^{-1}(B-\epsilon)|, |\phi^{-1}(-B+\epsilon)|\}$ . For a given vector  $V \in \mathbb{R}^d$ , select  $b \in A_S$  such  
847 that for all  $V' \in P_b$ , we have  $\angle(V, V') \leq \theta$ , where  $\theta$  is defined the same as case 1. From all vectors  
848 in  $P_b$ , select  $\hat{V}$  such that it has the maximum  $\ell_2$  norm, i.e., the one on the side of the hypercube. It  
849 is obvious that  $\|\hat{V}\|_2 \geq B_v$ . We will show that for any  $\bar{h} \in \overline{\mathcal{H}}$ , the Wasserstein distance between  
850  $\phi(V^\top \bar{h})$  and  $\phi(\hat{V}^\top \bar{h})$  is bounded.

851 Define following two sets

$$\begin{aligned} S_1 &= \{x \in \mathbb{R}^d \mid |\langle V, x \rangle| \leq u\}, \\ S_2 &= \{x \in \mathbb{R}^d \mid |\langle \hat{V}, x \rangle| \leq u\}. \end{aligned} \tag{27}$$

852 Given any  $x \in \mathbb{R}^d \setminus S_1 \cup S_2$  such that  $\|x\|_2 \leq B_z$ , we show that both of  $\langle V, x \rangle$  and  $\langle \hat{V}, x \rangle$  are  
853 either smaller than  $-u$  or larger than  $u$ . Assume that  $\langle \hat{V}, x \rangle > u$ . Denote  $\alpha = \angle(\hat{V}, x)$  and  
854  $\beta = \angle(V, \hat{V})$ . From the fact that  $\langle \hat{V}, x \rangle = \|\hat{V}\|_2 \|x\|_2 \cos \alpha \geq u$ , we conclude that  $\cos \alpha \geq 0$ . On  
855 the other hand, to conclude that  $\langle V, x \rangle$  is also larger than  $u$ , we only need to prove that  $\langle V, x \rangle \geq 0$   
856 since  $x \in \mathbb{R}^d \setminus S_1 \cup S_2$  and we already know that  $|\langle V, x \rangle| \geq u$ . Therefore, we want to prove that  
857  $\langle V, x \rangle = \|V\|_2 \|x\|_2 \cos(\alpha \pm \beta) \geq 0$ . It implies that we need to prove  $\cos \alpha \geq \sin \beta$ . But we know  
858 that

$$\begin{aligned} \cos \alpha &\geq \frac{u}{\|\hat{V}\|_2 \|x\|_2} \\ &\geq \frac{u}{\|\hat{V}\|_2 B_z} && (\text{Since } \|x\|_2 \leq B_z) \\ &\geq \frac{u}{\sqrt{d} B_v B_z} && (\text{Since } \hat{V} \in P_b \text{ and } \|\hat{V}\|_2 \leq \sqrt{d} B_v) \\ &\geq \frac{B-\epsilon}{LB_v B_z \sqrt{d}} \\ &\geq \frac{\delta}{B_v} \geq \sin \theta \geq \sin \beta, \end{aligned}$$

859 where we used the fact that the function  $\phi$  is Lipschitz continuous and we know that  $|\phi(u) - \phi(-u)| \leq$   
860  $2Lu$ . The last line follows from the fact that  $B_z \leq ((B-\epsilon)/\epsilon) (2\sqrt{d} \ln(B/\epsilon))$  (\*\*). It is easy to  
861 verify in the same way that if  $\langle \hat{V}, x \rangle \leq -u$ , then  $\langle V, x \rangle \leq -u$ .

862 Next, since  $\phi$  is monotone, we can write that for any  $x \in \mathbb{R}^d \setminus S_1 \cup S_2$  such that  $\|x\|_2 \leq B_z$ , we  
863 have either both  $V^\top x, \hat{V}^\top x$  in  $[B-\epsilon, B]$  or both  $V^\top x, \hat{V}^\top x$  in  $[-B, -B+\epsilon]$ , which means that  
864  $|V^\top x - \hat{V}^\top x| \leq \epsilon$ . Setting  $B_v^2 = 2Bu/(\epsilon\sigma\sqrt{2\pi})$ , for any mixture of Gaussian random variables

865  $\bar{h} \in \bar{\mathcal{H}}$  and for the coupling  $\pi^* \left( \phi(V^\top \bar{h}), \phi(\hat{V}^\top \bar{h}) \right)$ , we can write

$$\begin{aligned} & \int_{\mathbb{R}^d \times \mathbb{R}^d} \|\phi(V^\top \bar{h}) - \phi(\hat{V}^\top \bar{h})\|_2 d\pi^* \left( \phi(V^\top \bar{h}), \phi(\hat{V}^\top \bar{h}) \right) \\ & \leq \int_{Ball_d(0, B_z) \setminus S_1 \cup S_2} \epsilon dI_h + \int_{S_1 \cup S_2} 2BdI_h + \int_{\mathbb{R}^d \setminus Ball_d(0, B_z)} 2BdI_h \\ & \leq \epsilon + 2B \frac{u}{\sqrt{2\pi}\sigma B_v^2} + 2\epsilon \\ & \leq 4\epsilon, \end{aligned}$$

866 where we used the fact that  $x \in S_1 \cup S_2$  is similar to the probability that  $|x| \leq u/B_v$  for the zero  
867 mean Gaussian random variable  $x$  with variance  $(\sigma B_v)^2$ . We can, again, write that

$$\begin{aligned} d_{\mathcal{W}} \left( \phi(V^\top \bar{h}), \phi(\hat{V}^\top \bar{h}) \right) &= \inf_{\pi \in \Pi(\phi(V^\top \bar{h}), \phi(\hat{V}^\top \bar{h}))} \int_{\mathbb{R}^d \times \mathbb{R}^d} \|\phi(V^\top \bar{h}) - \phi(\hat{V}^\top \bar{h})\|_2 d\pi \left( \phi(V^\top \bar{h}), \phi(\hat{V}^\top \bar{h}) \right) \\ &\leq \int_{\mathbb{R}^d \times \mathbb{R}^d} \|\phi(V^\top \bar{h}) - \phi(\hat{V}^\top \bar{h})\|_2 d\pi^* \left( \phi(V^\top \bar{h}), \phi(\hat{V}^\top \bar{h}) \right) \leq 4\epsilon. \end{aligned}$$

868 So far, we proved that for any  $V \in \mathbb{R}^d$  there exists a  $\hat{V} \in C$  such that  $d_{\mathcal{W}} \left( \phi(V^\top \bar{h}), \phi(\hat{V}^\top \bar{h}) \right) \leq$   
869  $(4 + B)\epsilon$  for all mixtures  $\bar{h} \in \bar{\mathcal{H}}$ , which comes from the fact that  $4\epsilon \leq (4 + B)\epsilon$ . Now, we turn to  
870 covering functions in NET[d,p]. Note that the output of  $\phi(V^\top x)$  is real-valued. We also know that  $\Phi$   
871 is applied element-wise. Consider the set of

$$C_W = \{[V_1^\top \dots V_p^\top]^\top \mid V_i \in C \text{ for } i \in [p]\}.$$

872 We know that for any  $W = [V_1^\top \dots V_p^\top]^\top$  there exists  $\hat{W}^\top = [\hat{V}_1^\top \dots \hat{V}_p^\top]^\top$  such that for every  
873  $i \in [p]$ , we have  $d_{\mathcal{W}} \left( \phi(V_i^\top \bar{h}), \phi(\hat{V}_i^\top \bar{h}) \right) \leq (4 + B)\epsilon$ . Therefore, since we keep the coupling the  
874 same  $\pi^*$  for every  $i \in [p]$ , we can conclude that  $d_{\mathcal{W}} \left( \Phi(W^\top \bar{h}), \Phi(\hat{W}^\top \bar{h}) \right) \leq (4 + B)\epsilon d$ .

875 Now, using Theorem 20, we get that

$$d_{TV} \left( \bar{g}_\sigma(\Phi(W^\top \bar{h})), \bar{g}_\sigma(\Phi(\hat{W}^\top \bar{h})) \right) \leq \frac{9(4+B)\epsilon d}{2\sigma} \quad (28)$$

876 Consequently, for any  $\bar{z} \in \bar{\mathcal{G}}_\sigma \circ \bar{\mathcal{X}}_{B,d}$ , we can write

$$\begin{aligned} & d_{TV} \left( \bar{g}_\sigma(\Phi(W^\top \bar{z})), \bar{g}_\sigma(\Phi(\hat{W}^\top \bar{z})) \right) \\ & \leq d_{TV} \left( \bar{g}_\sigma(\Phi(W^\top \bar{z})), \bar{g}_\sigma(\Phi(W^\top \bar{h})) \right) \\ & \quad + d_{TV} \left( \bar{g}_\sigma(\Phi(W^\top \bar{h})), \bar{g}_\sigma(\Phi(\hat{W}^\top \bar{h})) \right) \\ & \quad + d_{TV} \left( \bar{g}_\sigma(\Phi(\hat{W}^\top \bar{h})), \bar{g}_\sigma(\Phi(\hat{W}^\top \bar{z})) \right) \\ & \leq \frac{36\sqrt{d}\eta}{\sigma} + \frac{9}{2}(4+B)\frac{\epsilon d}{\sigma}, \end{aligned} \quad (29)$$

877 where we used data processing inequality and Equation 28. Equation 29 implies that  $C_W$  is a global  
878 cover for  $\bar{\mathcal{G}}_\sigma \circ \text{NET}[d, p]$  with respect to  $d_{TV}$  metric. Clearly,

$$|C_W| \leq \left( \frac{(B_v)^{d+1}}{\delta^d \zeta} \right)^p = \left( \frac{2B_v d L \ln \frac{B}{\epsilon}}{\epsilon} \right)^{p(d+1)}.$$

879 Therefore, setting  $\eta = \sqrt{d}(4+B)\epsilon/72$  and  $\epsilon' = \epsilon\sigma/(5(4+B)d)$  we conclude that

$$\begin{aligned} N_U \left( \epsilon, \bar{\mathcal{G}}_\sigma \circ \text{NET}[d, p], \infty, d_{TV}, \bar{\mathcal{G}}_\sigma \circ \bar{\mathcal{X}}_{B,d} \right) &\leq \left( \frac{10(4+B)d^2 L B_v}{\epsilon\sigma} \ln \left( \frac{5(4+B)Bd}{\epsilon\sigma} \right) \right)^{p(d+1)} \\ &\leq \left( \frac{10\sqrt{10}(4+B)^{3/2}}{(2\pi)^{1/4}} \frac{d^{5/2} L \sqrt{B} u'}{\epsilon^{3/2} \sigma^2} \ln \left( \frac{5(4+B)Bd}{\epsilon\sigma} \right) \right)^{p(d+1)}, \end{aligned} \quad (30)$$

880 where

$$\begin{aligned} u' &= \max \left\{ |\phi^{-1}(B - \epsilon')|, |\phi^{-1}(-B + \epsilon')| \right\} \\ &= \max \left\{ |\phi^{-1}(B - \epsilon\sigma/(5(4+B)d))|, |\phi^{-1}(-B + \epsilon\sigma/(5(4+B)d))| \right\}, \end{aligned}$$

881 and

$$\sigma \leq \frac{5(4+B)Bd}{\epsilon} \leq \frac{5(4+B)Bd}{\epsilon}.$$

882 Note that we always use  $\sigma \leq 1$ . In that case, having  $\sigma > 5(4+B)Bd/\epsilon$  means that  $\epsilon > 5(4+B)Bd >$   
 883  $B\sqrt{d}$ . On the other hand, the domain of the output of  $\Phi$  is in  $[-B, B]^d$  and, therefore, in this case  
 884 the covering number would be simply one and no further analysis is required. Furthermore, the  
 885 assumption (\*) always hold since in order to obtain an  $\epsilon$ -cover for the single-layer neural network,  
 886 we will need to bound the Wassestein distance between  $\phi(V^\top \bar{h})$  and  $\phi(\hat{V}^\top \bar{h})$  by  $(4+B)\epsilon'$ . In this  
 887 case we have

$$\begin{aligned} \ln \frac{B}{\epsilon'} &\geq 1 \\ \Leftrightarrow \frac{B}{\epsilon'} &\geq e \\ \Leftrightarrow \frac{B}{e} &\geq \frac{\epsilon\sigma}{5(4+B)d} \\ \Leftrightarrow \frac{5(4+B)d}{e\sigma} B &\geq \epsilon, \end{aligned}$$

888 which holds since we consider  $\sigma \leq 1$  and  $\epsilon \leq B\sqrt{d}$ . Moreover, for assumption (\*\*) to hold, we need

$$\begin{aligned} B_z &\leq \left( \frac{B - \epsilon'}{\epsilon} \right) 2\sqrt{d} \ln \left( \frac{B}{\epsilon'} \right) \\ \Leftrightarrow (B + \sigma)\sqrt{d} + \sigma\sqrt{2 \ln \frac{B}{\epsilon'}} &\leq \left( \frac{B - \epsilon'}{\epsilon'} \right) 2\sqrt{d} \ln \left( \frac{B}{\epsilon'} \right) \\ \Leftrightarrow \frac{B+1}{\sqrt{\ln \frac{B}{\epsilon'}}} + \frac{\sqrt{2}}{\sqrt{d}} &\leq 2 \left( \frac{B - \epsilon'}{\epsilon'} \right) \sqrt{\ln \frac{B}{\epsilon'}} \\ \Leftrightarrow \frac{B+1}{(\ln \frac{B}{\epsilon'})^{1/4}} + \frac{\sqrt{2}}{\sqrt{d \ln(\frac{B}{\epsilon'})}} &\leq 2 \left( \frac{B - \epsilon'}{\epsilon'} \right) \\ \Leftrightarrow \left( \frac{B+1}{(\ln \frac{B}{\epsilon'})^{1/4}} + \frac{\sqrt{2}}{\sqrt{d \ln(\frac{B}{\epsilon'})}} \right) \frac{\epsilon'}{2} &\leq B - \epsilon' \\ \Leftrightarrow \left( \frac{B+1+\sqrt{2}}{2} + 1 \right) \epsilon' &\leq B \\ \Leftrightarrow \left( \frac{B+3+\sqrt{2}}{2} \right) \left( \frac{\epsilon\sigma}{5(4+B)d} \right) &\leq B \\ \Leftrightarrow \epsilon &\leq \frac{10(4+B)d}{(B+3+\sqrt{2})\sigma} B, \end{aligned}$$

889 which is always true if  $\sigma \leq 1$ . Note that in both (\*) and (\*\*) we were interested in values of  $\epsilon$  that are  
 890 smaller than  $B\sqrt{d}$ ; Otherwise, the covering number would be one.  $\square$

891 We can also simplify the constants and write Equation 30 as

$$N_U(\epsilon, \overline{\mathcal{G}_\sigma} \circ \text{NET}[d, p], \infty, d_{TV}, \overline{\mathcal{G}_\sigma} \circ \overline{\mathcal{X}_{B,d}}) \leq \left( 20(4+B)^{3/2} \frac{d^{5/2} L \sqrt{B u'}}{\epsilon^{3/2} \sigma^2} \ln \left( \frac{5(4+B)Bd}{\epsilon\sigma} \right) \right)^{p(d+1)}.$$

892 Also since  $\phi$  is a monotone function, we can approximate  $u'$  by

$$u' \leq \max \left\{ \left| \phi^{-1} \left( B - \frac{\sigma\epsilon}{5(4+B)d} \right) \right|, \left| \phi^{-1} \left( -B + \frac{\sigma\epsilon}{5(4+B)d} \right) \right| \right\}.$$

## E Proofs of theorems and lemmas in Section 7

### E.1 Proof of Theorem 26

*Proof.* We will prove the theorem for the stronger case where the output of single-layer neural network classes and  $\mathcal{H}$  is in  $[-B, B]^{p_T}$ . Consider two consecutive classes  $\text{NET}[p_i - 1, p_i]$  and  $\text{NET}[p_i, p_{i+1}]$ . From Lemma 18 we know that

$$\begin{aligned} & N_U \left( \frac{2\epsilon}{2BT\sqrt{p_T}}, \overline{\mathcal{G}_\sigma} \circ \text{NET}[p_i, p_{i+1}] \circ \overline{\mathcal{G}_\sigma} \circ \text{NET}[p_{i-1}, p_i], \infty, d_{TV}^\infty, \overline{\mathcal{G}_\sigma} \circ \overline{\mathcal{X}_{B, p_{i-1}}} \right) \\ & \leq N_U \left( \frac{\epsilon}{2BT\sqrt{p_T}}, \overline{\mathcal{G}_\sigma} \circ \text{NET}[p_{i-1}, p_i], \infty, d_{TV}^\infty, \overline{\mathcal{G}_\sigma} \circ \overline{\mathcal{X}_{B, p_{i-1}}} \right) \\ & \cdot N_U \left( \frac{\epsilon}{2BT\sqrt{p_T}}, \overline{\mathcal{G}_\sigma} \circ \text{NET}[p_i, p_{i+1}], \infty, d_{TV}^\infty, \overline{\mathcal{G}_\sigma} \circ \overline{\mathcal{X}_{B, p_i}} \right) = N_i \cdot N_{i+1}. \end{aligned} \quad (31)$$

Let

$$\overline{\mathcal{Q}} = \overline{\mathcal{G}_\sigma} \circ \text{NET}[p_{T-1}, p_T] \circ \dots \circ \overline{\mathcal{G}_\sigma} \circ \text{NET}[p_1, p_2].$$

It is clear that  $\overline{\mathcal{F}} = \overline{\mathcal{Q}} \circ \overline{\mathcal{G}_\sigma} \circ \text{NET}[d, p_1]$ . Equation 31 is true for every  $2 \leq i \leq T$ . Therefore, we can conclude that

$$N_U \left( \frac{(T-1)\epsilon}{2BT\sqrt{p_T}}, \overline{\mathcal{Q}}, \infty, d_{TV}^\infty, \overline{\mathcal{G}_\sigma} \circ \overline{\mathcal{X}_{B, p_1}} \right) \leq \prod_{i=2}^T N_i.$$

Using Lemma 18, we can again write that

$$\begin{aligned} & N_U \left( \frac{\epsilon}{2B\sqrt{p_T}}, \overline{\mathcal{F}}, m, d_{TV}^{\ell_2}, \overline{\Delta_d} \right) \\ & \leq N_U \left( \frac{(T-1)\epsilon}{2BT\sqrt{p_T}}, \overline{\mathcal{Q}}, \infty, d_{TV}^\infty, \overline{\mathcal{G}_\sigma} \circ \overline{\mathcal{X}_{B, p_1}} \right) \cdot N_U \left( \frac{\epsilon}{2BT\sqrt{p_T}}, \overline{\mathcal{G}_\sigma} \circ \text{NET}[d, p_1], \infty, d_{TV}^{\ell_2}, \overline{\Delta_d} \right) \\ & \leq \prod_{i=1}^T N_i. \end{aligned}$$

Finally, from Theorem 17 and the fact that  $\mathcal{F}$  is a class of functions from  $\mathbb{R}^d$  to  $[-B, B]^p$ , we can conclude that

$$N_U \left( \epsilon, \mathcal{F}, m, \|\cdot\|_2^{\ell_2} \right) \leq N_U \left( \frac{\epsilon}{2B\sqrt{p_T}}, \overline{\mathcal{F}}, m, d_{TV}^{\ell_2}, \overline{\Delta_d} \right) \leq \prod_{i=1}^T N_i.$$

904

□

### E.2 A technique to build deeper networks from networks with bounded covering number

The following lemma is a technique that can be used to “break” networks in two parts. Then one can find a  $\|\cdot\|_2$  covering number for the first few layers and use Theorem 26 for the rest. It is a useful technique that enables the use of existing networks with bounded  $\|\cdot\|_2$  covering number to create deeper networks while controlling the capacity. Another possible application of the following lemma is that it gives us the opportunity to get tighter bounds on the covering number in special settings. One example of such settings would be networks that have small norms of weights in the first few layers and potentially large weights in the final layers. In this case, it is possible to use  $\|\cdot\|_2$  covering numbers that are dependent on the norms of weights for the first few layers and Theorem 26 for the rest, which does not depend on the norms of weights.

**Lemma 35.** Let  $\mathcal{Q}$  be a class of functions (e.g., neural networks) from  $\mathbb{R}^d$  to  $\mathbb{R}^p$  and  $\text{NET}[p, p_1], \text{NET}[p_1, p_2], \dots, \text{NET}[p_{T-1}, p_T]$  be  $T$  classes of neural networks. Denote the composition of the  $T$ -layer neural network and  $\mathcal{Q}$  as

$$\overline{\mathcal{F}} = \overline{\mathcal{G}_\sigma} \circ \text{NET}[p_{T-1}, p_T] \circ \dots \circ \overline{\mathcal{G}_\sigma} \circ \text{NET}[p_1, p_2] \circ \overline{\mathcal{G}_\sigma} \circ \text{NET}[p, p_1] \circ \overline{\mathcal{G}_\sigma} \circ \mathcal{Q},$$

918 and let  $\mathcal{H} = \{h : \mathbb{R}^d \rightarrow [-B, B]^{p_T} \mid h(x) = \mathbb{E}_{\bar{f}} [\bar{f}(x)], \bar{f} \in \bar{\mathcal{F}}\}$ . Define the uniform covering  
 919 numbers of composition of neural network classes with the Gaussian noise class (with respect to  
 920  $d_{TV}^\infty$ ) as

$$N_i = N_U \left( \frac{\epsilon}{4BT\sqrt{p_T}}, \bar{\mathcal{G}}_\sigma \circ \text{NET}[p_{i-1}, p_i], \infty, d_{TV}^\infty, \bar{\mathcal{G}}_\sigma \circ \overline{\mathcal{X}_{B, p_{i-1}}} \right), \quad 1 \leq i \leq T, \quad p_0 = p,$$

921 and define the uniform covering number of class  $\mathcal{Q}$  as

$$N_0 = N_U \left( \frac{\epsilon\sigma}{18B\sqrt{p_T}}, \mathcal{Q}, m, \|\cdot\|_2^{\ell_2} \right).$$

922 Then we have,

$$N_U \left( \epsilon, \mathcal{H}, m, \|\cdot\|_2^{\ell_2} \right) \leq \prod_{i=0}^T N_i.$$

923 *Proof.* From Corollary 21, we can conclude that

$$N_U \left( \frac{\epsilon}{4B\sqrt{p_T}}, \bar{\mathcal{G}}_\sigma \circ \mathcal{Q}, m, d_{TV}^{\ell_2}, \bar{\Delta}_d \right) \leq N_U \left( \frac{\epsilon\sigma}{18B\sqrt{p_T}}, \mathcal{Q}, m, \|\cdot\|_2^{\ell_2} \right) = N_0.$$

924 Same as proof of Theorem 26, by using Lemma 18, we can say that for two consecutive classes  
 925  $\text{NET}[p_i - 1, p_i]$  and  $\text{NET}[p_i, p_{i+1}]$

$$\begin{aligned} & N_U \left( \frac{2\epsilon}{4BT\sqrt{p_T}}, \bar{\mathcal{G}}_\sigma \circ \text{NET}[p_i, p_{i+1}] \circ \bar{\mathcal{G}}_\sigma \circ \text{NET}[p_{i-1}, p_i], \infty, d_{TV}^\infty, \bar{\mathcal{G}}_\sigma \circ \overline{\mathcal{X}_{B, p_{i-1}}} \right) \\ & \leq N_U \left( \frac{\epsilon}{4BT\sqrt{p_T}}, \bar{\mathcal{G}}_\sigma \circ \text{NET}[p_{i-1}, p_i], \infty, d_{TV}^\infty, \bar{\mathcal{G}}_\sigma \circ \overline{\mathcal{X}_{B, p_{i-1}}} \right) \\ & \cdot N_U \left( \frac{\epsilon}{4BT\sqrt{p_T}}, \bar{\mathcal{G}}_\sigma \circ \text{NET}[p_i, p_{i+1}], \infty, d_{TV}^\infty, \bar{\mathcal{G}}_\sigma \circ \overline{\mathcal{X}_{B, p_i}} \right) = N_i \cdot N_{i+1} \end{aligned}$$

926 Let

$$\bar{\mathcal{E}} = \bar{\mathcal{G}}_\sigma \circ \text{NET}[p_{T-1}, p_T] \circ \dots \circ \bar{\mathcal{G}}_\sigma \circ \text{NET}[p, p_1].$$

927 It is clear that  $\bar{\mathcal{F}} = \bar{\mathcal{E}} \circ \bar{\mathcal{G}}_\sigma \circ \mathcal{Q}$ . Now, from Lemma 18, we can conclude that

$$\begin{aligned} & N_U \left( \frac{\epsilon}{2B\sqrt{p_T}}, \bar{\mathcal{F}}, m, d_{TV}^{\ell_2}, \bar{\Delta}_d \right) \\ & \leq N_U \left( \frac{\epsilon}{4B\sqrt{p_T}}, \bar{\mathcal{E}}, \infty, d_{TV}^\infty, \bar{\mathcal{G}}_\sigma \circ \overline{\mathcal{X}_{B, p}} \right) \cdot N_U \left( \frac{\epsilon}{4B\sqrt{p_T}}, \bar{\mathcal{G}}_\sigma \circ \mathcal{Q}, m, d_{TV}^{\ell_2}, \bar{\Delta}_d \right) \\ & \leq \prod_{i=0}^T N_i. \end{aligned}$$

928 Lastly, from Theorem 17, we can conclude that

$$N_U(\epsilon, \mathcal{H}, m, \|\cdot\|_2^{\ell_2}) \leq N_U \left( \frac{\epsilon}{2B\sqrt{p_T}}, \bar{\mathcal{F}}, \infty, d_{TV}^{\ell_2}, \bar{\Delta}_d \right) \leq \prod_{i=0}^T N_i.$$

929

□

## 930 **F Uniform convergence by bounding the covering number**

931 In this section we provide some technical backgrounds that are related to estimating NVAC and  
 932 finding valid  $GB$ s. Specifically, we discuss how to turn a bound on  $\|\cdot\|_2^{\ell_2}$  covering number to a bound  
 933 on generalization gap with respect to ramp loss.

934 **Preliminaries.** For any  $x \in \mathbb{R}$ , the ramp function  $r_\gamma$  with respect to a margin  $\gamma$  is defined as

$$r_\gamma(x) = \begin{cases} 0 & x \leq -\gamma, \\ 1 + \frac{x}{\gamma} & [-\gamma, 0], \\ 1 & \gamma > 0. \end{cases}$$



Let  $x = [x^{(1)}, \dots, x^{(k)}]^\top \in \mathbb{R}^k$  be a vector and  $\mathcal{Y} = [k]$ . The margin function  $\mathcal{M} : \mathbb{R}^k \times \mathcal{Y} \rightarrow \mathbb{R}$  is defined as  $\mathcal{M}(x, i) := x^{(i)} - \max_{j \neq i} x^{(j)}$ . Next, we define the ramp loss for classification.

**Definition 36** (Ramp loss). Let  $f : \mathcal{X} \rightarrow \mathbb{R}^k$  be a function and let  $\mathcal{D}$  be a distribution over  $\mathcal{X} \times \mathcal{Y}$  where  $\mathcal{Y} = [k]$ . We define the ramp loss of function  $f$  with respect to margin parameter  $\gamma$  as  $l_\gamma(f) = \mathbb{E}_{(x,y) \sim \mathcal{D}} [r_\gamma(-\mathcal{M}(f(x), y))]$ . We also define the empirical counterpart of ramp loss on an input set  $S \sim \mathcal{D}^m$  by  $\hat{l}_\gamma(f) = \frac{1}{m} \sum_{(x,y) \in S} r_\gamma(-\mathcal{M}(f(x), y))$ .

It is worth mentioning that using (surrogate) ramp loss is a natural case for classification tasks (Bartlett et al., 2006); (Boucheron et al., 2005).

Next, we define the composition of a hypothesis class with the ramp loss function.

**Definition 37** (Composition with ramp loss). Let  $\mathcal{F}$  be a hypothesis class from  $\mathcal{X}$  to  $\mathbb{R}^d$  and  $\mathcal{Y} = [k]$ . We denote the class of its composition with the ramp loss function by  $\mathcal{F}_\gamma : \mathcal{X} \times \mathcal{Y} \rightarrow [0, 1]$  and define it as  $\mathcal{F}_\gamma = \{(f_\gamma(x, y) = r_\gamma(-\mathcal{M}(f(x), y)) : f \in \mathcal{F}\}$ .

The following lemma states that we can always bound the 0-1 loss by the ramp loss.

**Lemma 38.** Let  $\mathcal{D}$  be a distribution over  $\mathcal{X} \times \mathcal{Y}$ , where  $\mathcal{Y} = [k]$  and let  $f$  be a function from  $\mathcal{X}$  to  $\mathbb{R}^k$ . We have

$$\mathbb{E}_{(x,y) \sim \mathcal{D}} [l^{0-1}(f(x), y)] \leq \mathbb{E}_{(x,y) \sim \mathcal{D}} [r_\gamma(-\mathcal{M}(f(x), y))] = l_\gamma(f).$$

For a proof of Lemma 38 see section A.2 in Bartlett et al. (2017).

One way to bound the generalization gap of a learning algorithm is to find the rate of uniform convergence for class  $\mathcal{F}_\gamma$ . We define uniform convergence in the following.

**Definition 39** (Uniform convergence). Let  $\mathcal{F}$  be a hypothesis class and  $l$  be a loss function. We say that  $\mathcal{F}$  has uniform convergence property if there exists some function  $m_{UC} : (0, 1)^2 \rightarrow \mathbb{N}$  such that for every distribution  $\mathcal{D}$  over  $\mathcal{X} \times \mathcal{Y}$  and any sample  $S \sim \mathcal{D}^m$  if  $m \geq m_{UC}(\epsilon, \delta)$  with probability at least  $1 - \delta$  (over the randomness of  $S$ ) for every hypothesis  $f \in \mathcal{F}$  we have

$$\left| \mathbb{E}_{(x,y) \sim \mathcal{D}} [l(f(x), y)] - \frac{1}{m} \sum_{(x,y) \in S} l(f(x), y) \right| \leq \epsilon.$$

An standard approach for finding the rate of uniform convergence is by analyzing the Rademacher complexity of  $\mathcal{F}_\gamma$ . We now define the empirical Rademacher complexity.

**Definition 40** (Empirical Rademacher complexity). Let  $\mathcal{F}$  be a class of hypotheses from  $\mathcal{Z}$  to  $\mathbb{R}$  and  $\mathcal{D}$  be a distribution over  $\mathcal{Z}$ . The empirical Rademacher complexity of class  $\mathcal{F}$  with respect to sample  $S = \{z_1, \dots, z_m\} \sim \mathcal{D}^m$  is denoted by  $\hat{\mathfrak{R}}(\mathcal{F}_S)$  and is defined as

$$\hat{\mathfrak{R}}(\mathcal{F}_S) = \mathbb{E}_\sigma \left[ \sup_{f \in \mathcal{F}} \sum_{i=1}^m \sigma_i f(z_i) \right]$$

where  $\sigma = (\sigma_1, \dots, \sigma_m)$  and  $\sigma_i$  are i.i.d. Rademacher random variables uniformly drawn from  $\{0, 1\}$ .

The following theorem relates the Rademacher complexity of  $\mathcal{F}_\gamma$  to its rate of uniform convergence and provides a generalization bound for the ramp loss and its empirical counterpart on a sample  $S$ .

**Theorem 41.** Let  $\mathcal{F}$  be a class of functions from  $\mathcal{X}$  to  $\mathbb{R}^k$  and  $\mathcal{D}$  be a distribution over  $\mathcal{X} \times \mathcal{Y}$  where  $\mathcal{Y} = [k]$ . Let  $S \sim \mathcal{D}^m$  denote a sample. Then, for every  $\delta$  and every  $f \in \mathcal{F}$ , with probability at least  $1 - \delta$  (over the randomness of  $S$ ) we have

$$l_\gamma(f) \leq \hat{l}_\gamma(f) + 2\hat{\mathfrak{R}}(\mathcal{F}_{\gamma|S}) + 3\sqrt{\frac{\ln(2/\delta)}{2m}}$$

Theorem 41 is an immediate result of standard generalization bounds based on Rademacher complexity (see e.g. Theorem 3.3 in (Mohri et al., 2018)) once we realize that  $\mathbb{E}_{(x,y) \sim \mathcal{D}} [f_\gamma] = l_\gamma(f)$  and  $\frac{1}{m} \sum_{(x,y) \in S} f_\gamma(x, y) = \hat{l}_\gamma(f)$ .

We will use Dudley entropy integral (Dudley, 2010) for chaining to bound the Rademacher complexity by covering number; see (Shalev-Shwartz and Ben-David, 2014) for a proof.

974 **Theorem 42** (Dudley entropy integral). *Let  $\mathcal{F}$  be a class of hypotheses with bounded output in  $[0, c_x]$ .*  
 975 *Then*

$$\mathfrak{R}(\mathcal{F}|_S) \leq \inf_{\epsilon \in [0, c_x/2]} \left\{ 4\epsilon + \frac{12}{\sqrt{m}} \int_{\epsilon}^{c_x/2} \sqrt{\ln N_U(\nu, \mathcal{F}, m, \|\cdot\|_2^{\ell_2})} d\nu \right\}.$$

976 Putting Theorems 41, 42, and Lemma 38 together, we can state the following theorem to bound the  
 977 0-1 loss based on the covering number of  $\mathcal{F}_\gamma$  and empirical ramp loss.

978 **Theorem 43.** *Let  $\mathcal{F}$  be a class of functions from  $\mathcal{X}$  to  $\mathbb{R}^k$  and  $\mathcal{D}$  be a distribution over  $\mathcal{X} \times \mathcal{Y}$  where*  
 979  *$\mathcal{Y} = [k]$ . Let  $S \sim \mathcal{D}^m$  be a sample. Then, with probability at least  $1 - \delta$  (over the randomness of  $S$ )*  
 980 *for every  $f \in \mathcal{F}$  we have*

$$\begin{aligned} \mathbb{E}_{(x,y) \sim \mathcal{D}} [l^{0-1}(f(x), y)] &\leq \\ l_\gamma(f) &\leq \hat{l}_\gamma(f) + \inf_{\epsilon \in [0, 1/2]} \left\{ 2 \left[ 4\epsilon + \frac{12}{\sqrt{m}} \int_{\epsilon}^{1/2} \sqrt{\ln N_U(\nu, \mathcal{F}_\gamma, m, \|\cdot\|_2^{\ell_2})} d\nu \right] \right\} + 3\sqrt{\frac{\ln(2/\delta)}{2m}}. \end{aligned}$$

981 We will use above theorem in the next appendix to estimate NVAC based on  $\|\cdot\|_2^{\ell_2}$  covering number  
 982 of composition of a class with ramp loss.

## 983 G Estimating NVAC using the covering number

984 In this appendix, we will use Theorem 43 to establish a way of approximating NVAC from a covering  
 985 number bound. In Remark 44 we state the technique used to approximate NVAC and in the following  
 986 we will justify why this would be a good approximation.

987 **Remark 44.** *Let  $\mathcal{F}$  be a hypothesis class from  $\mathcal{X}$  to  $\mathbb{R}^k$ ,  $S$  be a sample of size  $m$  and  $\hat{h} \in \mathcal{F}$ . We find*  
 988  *$n^*$  such that the following holds*

$$\frac{6}{\sqrt{mn^*}} \sqrt{\ln N_U(\epsilon, \mathcal{F}_\gamma, mn^*, \|\cdot\|_2^{\ell_2})} \leq \epsilon, \quad \epsilon = \frac{1 - \hat{l}_\gamma(\hat{h})}{10}, \quad (32)$$

989 *and choose  $mn^*$  as an approximation of NVAC. Here,  $\hat{l}_\gamma(\hat{h})$  is the empirical ramp loss of  $\hat{h}$  on sample*  
 990  *$S$ . In Appendix I, where we empirically compare NVAC of different covering number bounds, we*  
 991 *choose  $S$  to be the MNIST dataset and  $\hat{h}$  as the trained neural network (from a class  $\mathcal{F}$  of all neural*  
 992 *networks with a certain architecture) on this dataset.*

993 In the following we discuss why this choice of  $mn^*$  is a good estimate of NVAC. First, let  $S^n \in$   
 994  $(\mathcal{X} \times \mathcal{Y})^{mn}$  be an input set and  $\mathcal{D}$  be a distribution over  $(\mathcal{X} \times \mathcal{Y})$ , where  $mn$  is larger than  $mn^*$  as  
 995 found in Remark 44. From Theorem 43 and using the fact that the ramp loss is in  $[0, 1]$  we can write

$$\begin{aligned} \mathbb{E}_{(x,y) \sim \mathcal{D}} [l^{0-1}(\hat{h}(x), y)] &\leq \hat{l}_\gamma(\hat{h}) + 2\mathfrak{R}(\mathcal{F}_\gamma|_{S^n}) + 3\sqrt{\frac{\ln(2/\delta)}{2mn}} \\ &\leq \hat{l}_\gamma(\hat{h}) + \inf_{\epsilon \in [0, 1/2]} \left\{ 2 \left[ 4\epsilon + \frac{12}{\sqrt{mn}} \int_{\epsilon}^{1/2} \sqrt{\ln N_U(\nu, \mathcal{F}_\gamma, mn, \|\cdot\|_2^{\ell_2})} d\nu \right] \right\} + 3\sqrt{\frac{\ln(2/\delta)}{2mn}}. \end{aligned} \quad (33)$$

996 Since  $S^n$  consists of  $n$  copies of the sample  $S$ , we can replace  $\hat{l}_\gamma(\hat{h})$  on  $S^n$  by the ramp loss of  $\hat{h}$   
 997 on  $S$  (this would be equal to the ramp loss of trained neural network when we empirically compare  
 998 NVACs in Appendix I). Moreover, since the number of samples are very large and  $\delta = 0.01$ , we can  
 999 approximate the last term in the right hand side of Equation 33 with zero. Therefore, we can write

1000 that

$$\begin{aligned}
& \mathbb{E}_{(x,y) \sim \mathcal{D}} \left[ l^{0-1}(\hat{h}(x), y) \right] \\
& \leq \hat{l}_\gamma(\hat{h}) + \inf_{\epsilon \in [0, 1/2]} \left\{ 2 \left[ 4\epsilon + \frac{12}{\sqrt{mn}} \int_\epsilon^{1/2} \sqrt{\ln N_U(\nu, \mathcal{F}_\gamma, mn, \|\cdot\|_2^{\ell_2})} d\nu \right] \right\} \\
& \leq \hat{l}_\gamma(\hat{h}) + 2 \left[ 4\epsilon + \frac{12}{\sqrt{mn^*}} \int_\epsilon^{1/2} \sqrt{\ln N_U(\nu, \mathcal{F}_\gamma, mn^*, \|\cdot\|_2^{\ell_2})} d\nu \right] \quad (\forall \epsilon \in [0, 1/2]) \\
& \leq \hat{l}_\gamma(\hat{h}) + 2 \left[ 4\epsilon + \frac{6}{\sqrt{mn^*}} \sqrt{\ln N_U(\epsilon, \mathcal{F}_\gamma, mn^*, \|\cdot\|_2^{\ell_2})} \right], \tag{34}
\end{aligned}$$

1001 where we used the fact that  $N_U(\epsilon, \mathcal{F}_\gamma, mn, \|\cdot\|_2^{\ell_2})$  decreases monotonically with  $\epsilon$  and the integral is  
1002 over  $[\epsilon, 1/2]$ . Note that in the above equation we subtly used the fact that covering number grows at  
1003 most polynomially with the number of samples and, therefore, increasing number of samples will  
1004 always result in smaller right hand side term in Equation 34. In Appendix H, we will show why this is  
1005 a valid assumption for the covering number bounds that we use in our experiments (see Remark 54).

1006 Since Equation 34 holds for any  $\epsilon \in [0, 1/2]$ , we can set  $\epsilon = (1 - \hat{l}_\gamma(\hat{h}))/10$  and conclude that

$$\begin{aligned}
& \mathbb{E}_{(x,y) \sim \mathcal{D}} \left[ l^{0-1}(\hat{h}(x), y) \right] \\
& \leq \hat{l}_\gamma(\hat{h}) + 2 \left[ 4\epsilon + \frac{6}{\sqrt{mn^*}} \sqrt{\ln N_U(\epsilon, \mathcal{F}_\gamma, mn^*, \|\cdot\|_2^{\ell_2})} \right] \\
& \leq \hat{l}_\gamma(\hat{h}) + 2 \frac{5(1 - \hat{l}_\gamma(\hat{h}))}{10} \\
& \leq 1. \tag{35}
\end{aligned}$$

1007 From the above equation, we can conclude that by setting  $mn$  to be larger than  $mn^*$  as defined in  
1008 Remark 44, we can provide the following valid generalization bound with respect to  $l^{0-1}$  and  $l_\gamma$ :

$$GB(\hat{h}, S^n) = 2 \left[ 4\epsilon + \frac{6}{\sqrt{mn}} \sqrt{\ln N_U(\epsilon, \mathcal{H}, mn, \|\cdot\|_2^{\ell_2})} \right].$$

1009 Moreover, for any  $S^n$  such that  $mn \geq mn^*$  we can conclude that the  $GB$  defined above results in a  
1010 non-vacuous bound, i.e.,

$$GB(\hat{h}, S^n) + \hat{l}_\gamma(\hat{h}) \leq 1,$$

1011 which concludes that  $mn^*$  is a reasonable approximation for NVAC.

1012 In the next appendix, we discuss different covering number bounds that were mentioned in Section 9.  
1013 We state these covering number bounds for a general  $T$ -layer network in Appendix H. Finally  
1014 in Appendix I, we present the settings of our experiments and the empirical results of NVAC in  
1015 Remark 44.

## 1016 H Different approaches to bound the covering number

1017 In the following, we will state the covering number bounds that were compared in Section 9. We  
1018 first give two preliminary lemmas. Lemma 46 connects the covering number of a hypothesis class  
1019  $\mathcal{F}$  to the covering number of  $\mathcal{F}_\gamma$ , which is used in Remark 44 to obtain generalization bounds. In  
1020 Lemma 47 we will show a way to find the covering number of a class of functions from  $\mathbb{R}^d$  to  $\mathbb{R}^p$   
1021 from the covering number of real-valued classes that correspond to each dimension. We will use  
1022 this lemma when we want to compare covering number bounds in the literature that are given for  
1023 real-valued functions, i.e., Norm-based, Lipschitzness-based, and Pseudo-dim-based approaches.

1024 In the following remark, we will discuss the motivation behind the choice of specific generalization  
1025 bounds in Section 9

1026 **Remark 45** (Choice of generalization bounds). *In our experiments in Section 9 we have not assessed*  
1027 *the PAC-Bayes bound in Neyshabur et al. (2018) since it is always looser than the Spectral bound*

of (Bartlett et al., 2017); see Neyshabur et al. (2018) for a discussion. Furthermore, we exclude the generalization bounds that are proved in “two steps”. For example, a naive two-step approach is to divide the training data into a large and a small subsets; one can then train the network using the large set and evaluate the resulting hypothesis using the small set. This will give a rather tight generalization bound since in the second step we are evaluating a single hypothesis. However, it does not explain why the learning worked well (i.e., how the learning model came up with a good hypothesis in the first step). More sophisticated two-step approaches such as Dziugaite and Roy (2017); Arora et al. (2018); Zhou et al. (2019) offer more insights on why the model generalizes. However, they do not fully explain why the first step works well (i.e., the prior distribution in Dziugaite and Roy (2017) or the uncompressed network in Arora et al. (2018); Zhou et al. (2019). Therefore, we focus on bounds based on covering numbers (uniform convergence).

Next, we state the preliminaries lemmas that we use in some of the covering number bounds in literature to relate them to covering numbers for the composition of neural networks with the ramp loss.

**Lemma 46** (From covering number of  $\mathcal{F}$  to covering number of  $\mathcal{F}_\gamma$ ). *Let  $\mathcal{F}$  be a hypothesis class of functions from  $\mathcal{X}$  to  $\mathbb{R}^p$  and  $\mathcal{F}_\gamma : \mathcal{X} \times \mathcal{Y} \rightarrow [0, 1]$  be the class of its composition with ramp loss, where  $\mathcal{Y} = [k]$ . Then we have*

$$N_U(\epsilon, \mathcal{F}_\gamma, m, \|\cdot\|_2^{\ell_2}) \leq N_U\left(\frac{\gamma\epsilon}{2}, \mathcal{F}, m, \|\cdot\|_2^{\ell_2}\right).$$

*Proof.* First, it is easy to verify that  $r_\gamma$  and  $-\mathcal{M}(x, y)$  (with respect to the first input) are Lipschitz continuous functions with respect to  $\|\cdot\|_2$  with Lipschitz factors of  $1/\gamma$  and 2, respectively; see e.g., section A.2 in Bartlett et al. (2017). Therefore, we can conclude that  $r_\gamma(-\mathcal{M}(f(x), y))$  is Lipschitz continuous with Lipschitz factor of  $2/\gamma$ .

Fix an input set  $S = \{(x_1, y_1), \dots, (x_m, y_m)\} \subset \mathcal{X} \times \mathcal{Y}$  and let  $C = \{\hat{f}_{i|S} \mid \hat{f}_i \in \mathcal{F}, i \in [r]\}$  be an  $(\gamma\epsilon/2)$ -cover for  $\mathcal{F}_{|S}$ . In the following, we will denote the composition of  $\hat{f}_i$  with ramp loss by  $\hat{f}_{\gamma,i}$  for the simplicity of notation. Now, we prove that  $C_\gamma = \{\hat{f}_{\gamma,i|S} \mid \hat{f}_{\gamma,i} \in \mathcal{F}_\gamma, i \in [r]\}$  is also an  $\epsilon$ -cover for  $\mathcal{F}_{\gamma|S}$ .

Given any  $f \in \mathcal{F}$ , there exists  $\hat{f}_{i|S} \in C$  such that

$$\left\|(\hat{f}_i(x_1), \dots, \hat{f}_i(x_m)) - (f(x_1), \dots, f(x_m))\right\|_2^{\ell_2} \leq \frac{\gamma\epsilon}{2}.$$

We can then write that

$$\begin{aligned} & \left\|(\hat{f}_{\gamma,i}(x_1), \dots, \hat{f}_{\gamma,i}(x_m)) - (f_\gamma(x_1), \dots, f_\gamma(x_m))\right\|_2^{\ell_2} \\ &= \sqrt{\frac{1}{m} \sum_{k=1}^m \left(\hat{f}_{\gamma,i}(x_k) - (f_\gamma(x_k))\right)^2} \\ &\leq \sqrt{\frac{1}{m} \sum_{k=1}^m \left(r_\gamma\left(-\mathcal{M}(\hat{f}_i(x_k), y_k)\right) - r_\gamma\left(-\mathcal{M}(f(x_k), y_k)\right)\right)^2} \end{aligned} \tag{36}$$

From the Lipschitz continuity of  $r_\gamma(-\mathcal{M}(x, y))$  we can conclude that for any  $(x, y) \in \mathcal{X} \times \mathcal{Y}$

$$\left|r_\gamma(-\mathcal{M}(f(x), y)) - r_\gamma(-\mathcal{M}(\hat{f}_i(x), y))\right| \leq \frac{1}{\gamma} \|\mathcal{M}(\hat{f}_i(x), y) - \mathcal{M}(f(x), y)\|_2 \leq \frac{2}{\gamma} \|\hat{f}_i(x) - f(x)\|_2.$$

1056 Taking the above equation into account, we can rewrite Equation 36 as

$$\begin{aligned}
& \left\| (\hat{f}_{\gamma,i}(x_1), \dots, \hat{f}_{\gamma,i}(x_m)) - (f_{\gamma}(x_1), \dots, f_{\gamma}(x_m)) \right\|_2^{\ell_2} \\
& \leq \frac{2}{\gamma} \sqrt{\frac{1}{m} \sum_{k=1}^m \left( (\hat{f}_i(x_k) - f(x_k)) \right)^2} \\
& \leq \frac{2}{\gamma} \left\| (\hat{f}_i(x_1), \dots, \hat{f}_i(x_m)) - (f(x_1), \dots, f(x_m)) \right\|_2^{\ell_2} \\
& \leq \frac{2}{\gamma} \frac{\gamma \epsilon}{2} \\
& \leq \epsilon.
\end{aligned}$$

1057 In other words, for any  $f_{\gamma|S} \in \mathcal{F}_{\gamma|S}$  there exists  $\hat{f}_{\gamma,i|S} \in S$  such that  $\left\| \hat{f}_{\gamma,i|S} - f_{\gamma|S} \right\|_2^{\ell_2} \leq \epsilon$  and,  
1058 therefore,  $C_{\gamma}$  is an  $\epsilon$ -cover for  $\mathcal{F}_{\gamma|S}$  and the result follows.  $\square$

1059 The following lemma finds a covering number for a class of functions with outputs in  $\mathbb{R}^p$  from the  
1060 covering number of the classes of real-valued functions corresponding to each dimension

1061 **Lemma 47.** Let  $\mathcal{F}_1, \dots, \mathcal{F}_p : \mathcal{X} \rightarrow \mathbb{R}$  be  $p$  classes of real valued functions. Further let  $\mathcal{F} =$   
1062  $\{f(x) = [f_1(x), \dots, f_p(x)]^{\top} \mid f_i \in \mathcal{F}_i, i \in [p]\}$  be a class of functions from  $\mathcal{X}$  to  $\mathbb{R}^p$ , where each  
1063 dimension  $i$  in their output comes from the output of a real-valued function in  $\mathcal{F}_i$ . Then, we have

$$N_U(\epsilon, \mathcal{F}, m, \|\cdot\|_2^{\ell_2}) \leq \prod_{i=1}^p N_U\left(\frac{\epsilon}{\sqrt{p}}, \mathcal{F}_i, m, \|\cdot\|_2^{\ell_2}\right).$$

1064 *Proof.* Fix an input set  $S = \{x_1, \dots, x_m\} \subset \mathcal{X}$ . Let  $C_1, \dots, C_p$  be  $(\epsilon/\sqrt{p})$ -covers for  
1065  $\mathcal{F}_1|_S, \dots, \mathcal{F}_p|_S$ , respectively. We will construct the set  $C$  as follows and prove that  $C$  is an  $\epsilon$ -cover  
1066 for  $\mathcal{F}|_S$ .

$$C = \left\{ [f_1(x_k), \dots, f_p(x_k)]^{\top} \mid \hat{f}_{i|S} \in C_i, i \in [p], k \in [m] \right\}.$$

1067 Particularly, from each class  $\mathcal{F}_i$ , we are choosing all functions  $\hat{f}_i$  such that  $\hat{f}_{i|S}$  is in  $C_i$ . We then use  
1068 those functions as the dimension  $i$  of the output to get functions  $f \in \mathcal{F}$ . Then we put the restriction  
1069 of these functions to set  $S$  in  $C$ . Clearly,  $|C| \leq \prod_{i=1}^p |C_i|$ .

1070 Let  $f(x) = [f_1(x), \dots, f_p(x)]^{\top}$  be any function in  $\mathcal{F}$ . Since  $C_1, \dots, C_p$  are  $(\epsilon/\sqrt{p})$ -covers for  
1071  $\mathcal{F}_1, \dots, \mathcal{F}_p$  we know that there exists another set of functions  $\hat{f}_i \in \mathcal{F}_i, i \in [p]$  such that  $\hat{f}_{i|S} \in C_i$   
1072 and

$$\left\| (\hat{f}_i(x_1), \dots, \hat{f}_i(x_m)) - (f_i(x_1), \dots, f_i(x_m)) \right\|_2^{\ell_2} \leq \frac{\epsilon}{\sqrt{p}}, \quad \forall i \in [p].$$

1073 Let  $\hat{f}(x) = [\hat{f}_1(x), \dots, \hat{f}_p(x)]^\top$ . We can then write that

$$\begin{aligned}
\|f|_S - \hat{f}|_S\|_2^{\ell_2} &= \|(f(x_1), \dots, f(x_m)) - (\hat{f}(x_1), \dots, \hat{f}(x_m))\|_2^{\ell_2} \\
&= \sqrt{\frac{1}{m} \sum_{k=1}^m \|f(x_k) - \hat{f}(x_k)\|_2^2} \\
&\leq \sqrt{\frac{1}{m} \sum_{k=1}^m \sum_{i=1}^p (f_i(x_k) - \hat{f}_i(x_k))^2} \\
&\leq \sqrt{\sum_{i=1}^p \sum_{k=1}^m \frac{1}{m} (f_i(x_k) - \hat{f}_i(x_k))^2} \\
&\leq \sqrt{\sum_{i=1}^p \left( \|(f_i(x_1), \dots, f_i(x_m)) - (\hat{f}_i(x_1), \dots, \hat{f}_i(x_m))\|_2^{\ell_2} \right)^2} \\
&\leq \sqrt{\sum_{i=1}^p \frac{\epsilon^2}{p}} \\
&\leq \epsilon
\end{aligned}$$

1074 Therefore, we can conclude that  $C$  is an  $\epsilon$ -cover for  $\mathcal{F}|_S$ . Since  $|C| \leq \prod_{i=1}^p |C_i|$  the result follows.  $\square$

1076 In the following we will state the covering number bounds that are compared using their NVACs in  
1077 Section 9 .

1078 **Covering number bounds.** We first state the bound in Theorem 26, where we use the covering  
1079 number of Theorem 25 for each layer of the neural network.

1080 **Theorem 48** (The bound of Theorem 26). *Let  $NET[d, p_1], NET[p_1, p_2], \dots, NET[p_{T-1}, p_T]$  be  $T$*   
1081 *classes of neural networks. Denote the  $T$ -layer noisy network by*

$$\bar{\mathcal{F}} = \bar{\mathcal{G}}_\sigma \circ NET[p_{T-1}, p_T] \circ \dots \circ \bar{\mathcal{G}}_\sigma \circ NET[p_1, p_2] \circ \bar{\mathcal{G}}_\sigma \circ NET[d, p_1],$$

1082 and let  $\mathcal{H} = \{h : \mathbb{R}^d \rightarrow [0, 1]^{p_T} \mid h(x) = \mathbb{E}_{\bar{\mathcal{F}}} [\bar{f}(x)], \bar{f} \in \bar{\mathcal{F}}\}$ . Then we have

$$\begin{aligned}
&\ln N_U \left( \epsilon, \mathcal{H}_\gamma, m, \|\cdot\|_2^{\ell_2} \right) \\
&\leq \sum_{i=2}^T p_i \cdot p_{i-1} \ln \left( \frac{(4T\sqrt{p_T})^{3/2} p_{i-1}^{5/2} \sqrt{\ln \left( \frac{(120/\gamma)T\sqrt{p_T}p_{i-1} - \epsilon\sigma}{\epsilon\sigma} \right)}}{282 \frac{(\gamma\epsilon)^{3/2} \sigma^2}} \ln \left( \frac{120T p_{i-1} \sqrt{p_T}}{\gamma\epsilon\sigma} \right) \right) \\
&\quad + dp_1 \ln \left( \frac{18T\epsilon m \sqrt{p_T}}{\gamma\epsilon\sigma} \right).
\end{aligned}$$

1083 *Proof.* We first use Theorem 25 to find the covering number of  $NET[p_{i-1}, p_i]$ . Particularly, for any  
1084  $2 \leq i \leq T$  we have,

$$\begin{aligned}
\ln N_i &= \ln N_U \left( \frac{\epsilon}{2T\sqrt{p_T}}, \bar{\mathcal{G}}_\sigma \circ NET[p_{i-1}, p_i], \infty, d_{TV}^\infty, \bar{\mathcal{G}}_\sigma \circ \mathcal{X}_{1, p_{i-1}} \right) \\
&\leq p_i \cdot p_{i-1} \ln \left( \frac{(2T\sqrt{p_T})^{3/2} p_{i-1}^{5/2} \sqrt{\ln \left( \frac{60T\sqrt{p_T}p_{i-1} - \epsilon\sigma}{\epsilon\sigma} \right)}}{282 \frac{\epsilon^{3/2} \sigma^2}} \ln \left( \frac{60T p_{i-1} \sqrt{p_T}}{\epsilon\sigma} \right) \right).
\end{aligned}$$

Moreover, we use Lemma 14.17 in Anthony et al. (1999) to find a bound on  $N_0$ . This lemma provides a bound with respect to  $\|\cdot\|_2^\infty$ , however, we know that  $\|\cdot\|_2^{\ell_2}$  is always smaller than  $\|\cdot\|_2^\infty$  (see Remark 5). Therefore, we can bound  $N_0$  as follows

$$\ln N_0 \leq dp_1 \ln \left( \frac{9Tem\sqrt{p_T}}{\epsilon\sigma} \right).$$

From Theorem 26 we know that  $\ln N_U \left( \epsilon, \mathcal{H}, m, \|\cdot\|_2^{\ell_2} \right) \leq \sum_{i=1}^T \ln N_i$ , therefore, we can write that

$$\begin{aligned} & \ln N_U \left( \epsilon, \mathcal{H}, m, \|\cdot\|_2^{\ell_2} \right) \\ & \leq \sum_{i=1}^T p_i \cdot p_{i-1} \ln \left( 282 \frac{(2T\sqrt{p_T})^{3/2} p_{i-1}^{5/2} \sqrt{\ln \left( \frac{60T\sqrt{p_T} p_{i-1} - \epsilon\sigma}{\epsilon\sigma} \right)}}{\epsilon^{3/2} \sigma^2} \ln \left( \frac{60T p_{i-1} \sqrt{p_T}}{\epsilon\sigma} \right) \right) \\ & + dp_1 \ln \left( \frac{9Tem\sqrt{p_T}}{\epsilon\sigma} \right). \end{aligned}$$

Applying Lemma 46 to turn this covering number into a covering number for  $\mathcal{H}_\gamma$  concludes the result.  $\square$

**Notation.** For the rest of this section, we will be presenting the covering number bounds in literature. For some of these bounds we will require the norm of the weights of network. Therefore, we use a new notation for the class of single-layer neural networks. More precisely, we will use  $\text{NET}[d, p, W]$  to denote the same class as  $\text{NET}[d, p]$  but we are also pointing out the weight matrix  $W \in \mathbb{R}^{d \times p}$ . For a matrix  $W \in \mathbb{R}^{d \times p}$  we denote its  $\|\cdot\|_{s,t}$  norm as  $\|(\|W_{:,1}\|_s, \dots, \|W_{:,p}\|_s)\|_t$ , where  $W_{:,i}$  denotes the  $i$ th column of  $W$  (e.g. for a weight matrix  $W$ ,  $\|W^\top\|_{1,\infty}$  refers to the maximum of  $\|\cdot\|_1$  norm of incoming weights of a neuron). By  $\|W\|_\sigma$  we denote the spectral norm of a matrix. For a matrix  $X \in \mathbb{R}^{d \times m}$  we denote its normalized Frobenious norm by  $\|X\|_F$ , which is defined as  $\|X\|_F = \sqrt{\frac{1}{m} \sum x_{i,j}^2}$ .

We would like to mention that, in the experiments, we use a slightly different form of sigmoid function for the activation function rather than the one in Definition 23. Indeed, we will add a constant to the sigmoid function to turn it into an odd function in  $[-1/2, 1/2]$ . In the following remark we will discuss the reason behind this choice and the fact that it does not change the covering number in Theorem 48.

**Remark 49.** The bound in the Spectral covering number requires the activation functions to output 0 at the origin. Therefore, in our experiments in Section 9, we set  $\phi(x) = \frac{1}{1+e^{-x}} - \frac{1}{2}$  as activation functions for neurons of the network, so that  $\phi(0) = 0$  and  $\phi(x) \in [-1/2, 1/2]$ . This will not affect the covering number bound of Theorem 48. The bound in Theorem 48 is derived from the covering number bound of Theorem 25 for single-layer neural network classes. There are three sources of dependency on the activation function in Theorem 25. The first one is the dependence on the range of output, which is 1 for both  $\phi(x) = \frac{1}{1+e^{-x}} - \frac{1}{2}$  and the sigmoid function  $\phi(x) = \frac{1}{1+e^{-x}}$  defined in Definition 23. The second dependency is the Lipschitz factor which is 1 for both of the activation functions. The final dependency is on  $u = \max \{|\phi^{-1}(B - \epsilon)|, |\phi^{-1}(-B + \epsilon)|\}$ . It is easy to verify that the value of  $u$  for  $\phi(x) = \frac{1}{1+e^{-x}} - \frac{1}{2}$  is exactly the same as the value of  $u$  for  $\phi(x) = \frac{1}{1+e^{-x}}$ . As a result, using both  $\phi(x) = \frac{1}{1+e^{-x}}$  and  $\phi(x) = \frac{1}{1+e^{-x}} - \frac{1}{2}$  will result in the same covering number bound in Theorem 48. Generally, adding a constant to the output of functions in a class will not change its covering number.

We will now discuss the Norm-based bound from Theorem 14.17 in Anthony et al. (1999), which is a bound for real-valued networks. Therefore, we will apply Lemma 47 to relate it to a covering number for neural networks with  $p$  output dimensions.

**Theorem 50** (Norm-based covering number). *Let  $\text{NET}[d, p_1, W_1], \dots, \text{NET}[p_{T-1}, p_T, W_T]$  be  $T$  classes of neural networks and  $\mathcal{F} = \text{NET}[p_{T-1}, p_T, W_T] \circ \dots \circ \text{NET}[d, p_1, W_1]$ . Denote by  $V$  the*

1123 maximum of  $\|\cdot\|_{1,\infty}$  among the layers of the network, i.e.,  $V = \max_i \|W_i^\top\|_{1,\infty}$ . Then we have

$$\log_2 N_U(\epsilon, \mathcal{F}_\gamma, m, \|\cdot\|_2^{\ell_2}) \leq \frac{\sqrt{p_T}}{2} \left( \frac{2\sqrt{p_T}}{\gamma\epsilon} \right)^{2T} (2V)^{T(T+1)} \log_2(2d+2).$$

1124 *Proof.* The proof simply follows from Theorem 14.17 in Anthony et al. (1999) and Lemmas 46 and  
1125 47 once we realize that the sigmoid function is Lipschitz continuous with Lipschitz factor of 1.  $\square$

1126 Next we state the Pseudo-dim-based bound.

1127 **Theorem 51** (Pseudo-dim-based covering number). *Let  $NET[d, p_1], \dots, NET[p_{T-1}, p_T]$  be  $T$*   
1128 *classes of neural networks and  $\mathcal{F} = NET[p_{T-1}, p_T] \circ \dots \circ NET[d, p_1]$ . Denote the total num-*  
1129 *ber of weights of network by  $W = dp_1 + \sum_{i=2}^T p_{i-1} \cdot p_i$  and the total number of hidden neurons by*  
1130  *$r = \sum_{i=1}^T p_i$ . Furthermore, let  $P$  be as follows*

$$P = ((W+2)r)^2 + 11(W+2)r \log_2(18(W+2)r^2).$$

1131 Then we have

$$\ln N_U(\epsilon, \mathcal{F}_\gamma, m, \|\cdot\|_2^{\ell_2}) \leq \sqrt{p_T} P \ln \left( \frac{2\sqrt{p_T}em}{P\gamma\epsilon} \right).$$

1132 *Proof.* By Theorem 14.2 in Anthony et al. (1999) we know that the pseudo dimension ( $P_{\dim}$ ) of  $\mathcal{F}_i$  is  
1133 smaller or equal to  $P$ , where  $\mathcal{F}_i$  is the class of real-valued functions corresponding  $i$ th dimension  
1134 of output of functions in class  $\mathcal{F}$  (for a definition of pseudo dimension see for instance Chapter 11  
1135 in Anthony et al. (1999)). Furthermore, from the standard analysis of covering number and pseudo  
1136 dimension (see e.g., Theorem 12.2 in Anthony et al. (1999)), we can write

$$\ln N_U(\epsilon, \mathcal{F}_i, m, \|\cdot\|_2^{\ell_2}) \leq P_{\dim} \ln \left( \frac{em}{\epsilon P_{\dim}} \right).$$

1137 Combining the above equation with Lemmas 46 and 47 concludes the result.  $\square$

1138 Now we turn into presenting the Lipschitzness-based bound.

1139 **Theorem 52** (Lipschitzness-based covering number). *Let  $NET[d, p_1, W_1], \dots, NET[p_{T-1}, p_T, W_T]$*   
1140 *be  $T$  classes of neural networks and  $\mathcal{F} = NET[p_{T-1}, p_T, W_T] \circ \dots \circ NET[d, p_1, W_1]$ . Denote by*  
1141  *$V$  the maximum of  $\|\cdot\|_{1,\infty}$  among all but the first layers of the network, i.e.,  $V = \max_{i \geq 2} \|W_i^\top\|_{1,\infty}$*   
1142 *and denote the total number of weights of network by  $W = dp_1 + \sum_{i=2}^T p_{i-1} \cdot p_i$ . Then we have*

$$\ln N_U(\epsilon, \mathcal{F}_\gamma, m, \|\cdot\|_2^{\ell_2}) \leq W \sqrt{p_T} \ln \left( \frac{4em\sqrt{p_T}WV^T}{\gamma\epsilon(V-1)} \right).$$

1143 *Proof.* The covering number follows from the bound in Theorem 14.5 in Anthony et al. (1999),  
1144 which is a  $\|\cdot\|_2^\infty$  covering number, but we know that  $\|\cdot\|_2^{\ell_2}$  is always smaller than  $\|\cdot\|_2^\infty$ . Therefore,  
1145 from Theorem 14.5 in Anthony et al. (1999), Lemma 47, and the fact that sigmoid is a Lipschitz  
1146 continuous function with Lipschitz factor of 1 we know that

$$\ln N_U(\epsilon, \mathcal{F}, m, \|\cdot\|_2^{\ell_2}) \leq W \sqrt{p_T} \ln \left( \frac{2em\sqrt{p_T}WV^T}{\epsilon(V-1)} \right).$$

1147 Combining the above equation with Lemma 46 will result in the desired bound.  $\square$

1148 Finally, we will present the Spectral bound in Bartlett et al. (2017). In our experiments, we consider  
1149 the reference matrices  $M_i$  in the following theorem to be zero.

1150 **Theorem 53** (Spectral covering number). *Let  $NET[d, p_1, W_1], \dots, NET[p_{T-1}, p_T, W_T]$  be  $T$*   
1151 *classes of neural networks and  $\mathcal{F} = NET[p_{T-1}, p_T, W_T] \circ \dots \circ NET[d, p_1, W_1]$ . Let refer-*  
1152 *ence matrices  $M_1 \in \mathbb{R}^{d \times p_1}$  and  $M_i \in \mathbb{R}^{p_{i-1} \times p_i}$ ,  $2 \leq i \leq T$  be given. For an input set*  
1153  *$S = \{x_1, \dots, x_m\} \subset \mathbb{R}^d$  define  $X = [x_1 \dots x_m] \in \mathbb{R}^{d \times m}$  as the collection of input samples.*  
1154 *Further, for any  $i \in [T]$ , let  $\|W_i\|_\sigma \leq s_i$  and  $\|W_i^\top - M_i^\top\|_{2,1} \leq b_i$ . Then we have*

$$\ln N_U(\epsilon, \mathcal{F}_\gamma, m, \|\cdot\|_2^{\ell_2}) \leq \frac{4\|X\|_F^2 \ln(2W^2)}{\gamma^2 \epsilon^2} \left( \prod_{i=1}^T s_i^2 \right) \left( \sum_{i=1}^T \left( \frac{b_i}{s_i} \right)^{2/3} \right)^3.$$



The original bound in Bartlett et al. (2017) considers the input norm  $\|X\|_F^2$  to be the sum of  $\|\cdot\|_2^2$  norms of input samples and adjusts the chaining technique of Theorem 42 to account for this assumption. Here, for the sake of consistency, we consider the Frobenious norm to be normalized and use the conventional chaining technique, which applies to the  $\|\cdot\|_2^{\ell_2}$  metric.

**Remark 54.** *Some of the bounds that we presented are dependent on the number of input samples  $m$ . However, for all of them the logarithm of covering number has at most a logarithmic dependence on the number of samples. It is also worth mentioning that the Spectral bound is dependent on the normalized Frobenious norm and increasing the number of copies of  $S$  in Equation 34 (i.e.,  $mn$ ) will not change this norm and, therefore, the Spectral bound.*

## I Empirical results

In this appendix we will discuss details of the learning settings for the empirical results that were stated in Section 9. We train fully connected neural networks on the publicly available MNIST dataset, which consists of handwritten digits ( $28 \times 28$  pixel images) with 10 labels. Our baseline architecture has 3 hidden layers each containing 250 neurons, one input layer, and one output layer. The input layer has 784 neurons, which are pixels of each image in MNIST dataset. The output layer has 10 neurons, corresponding to the 10 labels. All the activation functions are the shifted variant of the sigmoid function as discussed in Appendix H, i.e.,  $\phi(x) = \frac{1}{1+e^{-x}} - \frac{1}{2}$ . The additional architectures that we use are as follows: (a) fully connected neural networks with one input layer, one output layer, and 2, 4, 5 hidden layers each containing 250 neurons; (b) fully connected neural networks with one input layer, one output layer, and three hidden layers each containing 64, 150, 350, 500, 800, 1000, 1500 neurons. All of the experiments are performed using NVIDIA Titan V GPU.

Networks are trained with SGD optimizer with a momentum of 0.9 and a learning rate of 0.3. For the purpose of training the loss is set to be the cross-entropy loss. For the rest of the experiments (e.g., to report the accuracy and NVACs) ramp loss with a margin of  $\gamma = 0.1$  is used. The size of training, validation, and test sets are 59000, 1000, and 10000, respectively. In Theorem 26 we are considering noisy networks with its expectation as output. Therefore, for reporting results of Theorem 26 we compute the output 50 times and take an average. Computing random outputs several times and averaging them yields in negligible error bars in the demonstrated results.

The results of NVAC as a function of depth and width are depicted in Figure 2. All of the NVACs are derived according to Remark 44. In Figure 2, we also include the Norm-based approach (Theorem 50) which was omitted from the Figures in Section 9 due to its large scale. As mentioned in Section 9, the bounds that are based on norms and group norms perform poorly compared to those that are based on parameter count. In the following, we will investigate this observation.

The first justification behind this observation is the dependence on  $1/\epsilon$ . From Theorems 50 and 53 we know that the logarithm of covering number in Norm-based approach has a polynomial dependence on  $1/\epsilon$ , i.e.,  $O((1/\epsilon)^{2T})$ , while in the Spectral approach it has a linear dependence, i.e.,  $O(1/\epsilon)$ . On the other hand, Pseudo-dim-based, Lipschitzness-based, and Theorem 26 has a logarithmic dependence on  $1/\epsilon$ .

The second reason behind this observation is that the Spectral and Norm-based approaches depend on the product of the weights. Although one may think that in networks with large number of parameters this dependency would be better than those on the number of parameters, we will see that the Pseudo-dim-based, Lipschitzness-based, and Theorem 26 perform better in these cases. For instance, consider the network that has been trained with three hidden layers, each containing 1500 neurons. In this case, the number of parameters is  $\approx 5 \times 10^9$ , while in the Spectral approach, the contribution of product of norms to covering number is  $\approx 1 \times 10^9$  and the contribution of  $1/\epsilon$  is  $\approx 4 \times 10^4$ . In the norm-based approach the contribution of the product of norms is  $\approx 1 \times 10^{53}$  alone.

Finally, we will explore the observation that the bound in Theorem 26 performs better than the Pseudo-dim-based and Lipschitzness-based bounds. Let  $w$  denote the maximum number of neurons in a hidden layer. The logarithm of the covering number bound in Theorem 26 depends on  $O(w^2 \ln(w^{5/2}))$ , while the Pseudo-dim-based bound in Theorem 51 depends on  $O(w^6)$ . Comparing Theorem 26 with the Lipschitzness-based covering number is more challenging because Lipschitzness-based bound depends on  $O(w^2 \ln(w^2))$  and also on  $T \ln(V)$ . It is also important to note that Theorem 26 works naturally for multi-output layer while Lipschitzness-based bound works

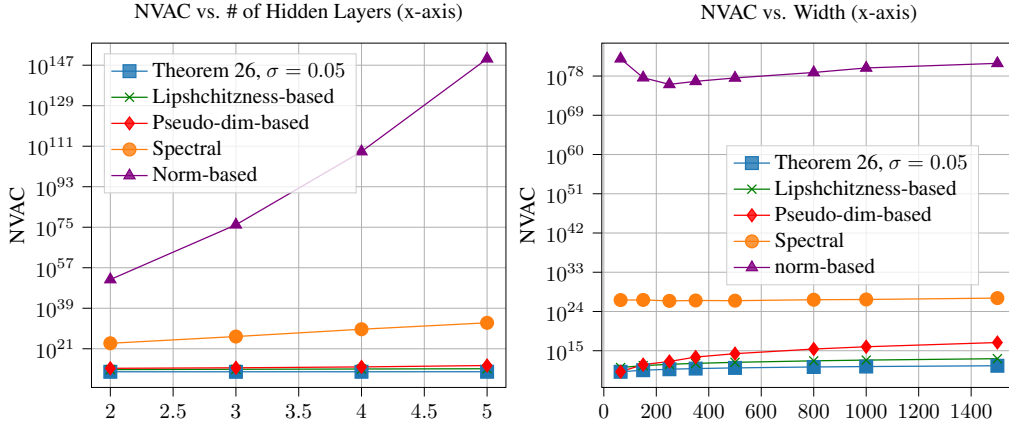

Figure 2: NVAC of different generalization bounds as a function of the number of hidden layers and width of the network.

for real-valued functions and requires to find a covering number for each output separately. The empirical results, however, suggests that the Lipschitzness-based bound is worse than the bound in Theorem 26. It is worth mentioning that in the rightmost graph in Figure 1, the output of noisy networks are averaged over 1000 noisy outputs to obtain results that are more close to the true expectation that has been considered in the output of architecture in Theorem 26.

## J Techniques to estimate smooth densities with mixtures of Gaussians

**Notation.** Denote by  $\mathcal{D}(\bar{x})$  the probability density function of the random variable  $\bar{x}$ . Let  $1\{x \in S\}$  be an indicator function that outputs 1 if  $x \in S$  and 0 if  $x \notin S$ . For a function  $f : \mathcal{X} \rightarrow \mathcal{Y}$ , let  $f_+(x) = \max\{0, f(x)\}$  and  $f_-(x) = \min\{0, f(x)\}$ . By  $\mathbb{R}^d \setminus [-B, B]^d$  we refer to the complement of set  $[-B, B]^d$  with respect to  $\mathbb{R}^d$ . We also denote by  $f * g$  the convolution of functions  $f$  and  $g$ . For two sets  $S_1$  and  $S_2$ , we define their Cartesian product by  $S_1 \times S_2$  and by  $S^d$  we refer to the Cartesian power, i.e.,  $S^d = \{(s_1, \dots, s_d) \mid s_i \in S, \forall i \in [d]\}$ . In the following lemma, we sometimes drop the overlines in our notation and simply write  $x$  when we are referring to random variables. When it is clear from the context, we write  $f$  instead of  $f(x)$ .

**Lemma 55** (Gaussian kernel estimation of bounded distributions). *Let  $\bar{x}$  be a random variable in  $\mathcal{X}_{B,d}$  and denote its probability density function by  $f = \mathcal{D}(\bar{x})$ . Let  $g$  be the density function of a zero mean Gaussian random variable with covariance matrix  $\sigma^2 I_d$ . Given a set  $S = \{x_1, \dots, x_n\} \subset \mathbb{R}^d$  of i.i.d. samples  $x_i \sim f$ ,  $i \in [n]$ , we define the empirical measure as  $\mu_n(x) = \frac{1\{x \in S\}}{n}$ . Then, we have*

$$\mathbb{E} \left[ \int_{\mathbb{R}^d} |(\mu_n * g)(x) - (f * g)(x)| dx \right] \leq 2\sqrt{\frac{1}{n}} \left( \frac{2B}{\sqrt{(2\pi\sigma^2)}} + 1 \right)^d$$

*Proof.* Note that  $\int \mu_n(x) dx = 1$  and since  $f$  and  $g$  are probability density functions, we know that  $\int (f * g)(x) dx = 1$  and  $\int (\mu_n * g)(x) dx = 1$ . Therefore, we have (for simplicity, we write  $\mathbb{E}_{x_i \sim f}$

1229 instead of  $\mathbb{E}_{x_i \sim f, i \in [n]}$

$$\begin{aligned}
& \mathbb{E}_{x_i \sim f} \left[ \int_{\mathbb{R}^d} |(\mu_n * g)(x) - (f * g)(x)| dx \right] \\
&= \int_{\mathbb{R}^d} \mathbb{E}_{x_i \sim f} [ |(\mu_n * g)(x) - (f * g)(x)| dx ] \\
&= 2 \int_{\mathbb{R}^d} \mathbb{E}_{x_i \sim f} [ (\mu_n * g - f * g)_+(x) dx ] \\
&\leq 2 \int_{\mathbb{R}^d} \sqrt{\mathbb{E}_{x_i \sim f} [ ((\mu_n * g)(x) - (f * g)(x))^2 ]} dx && \text{(By Jensen's inequality)} \\
&\leq 2 \int_{\mathbb{R}^d} \sqrt{\mathbb{E}_{x_i \sim f} \left[ \left( \frac{1}{n} \sum_{i=1}^n g(x - x_i) - \int f(y)g(x - y)dy \right)^2 \right]} dx.
\end{aligned} \tag{37}$$

1230 Now, we can write

$$\begin{aligned}
& \mathbb{E}_{x_i \sim f} \left[ \left( \frac{1}{n} \sum_{i=1}^n g(x - x_i) - \int f(y)g(x - y)dy \right)^2 \right] = \mathbb{E}_{x_i \sim f} \left[ \left( \frac{1}{n} \sum_{i=1}^n g(x - x_i) \right)^2 \right] \\
&+ \mathbb{E}_{x_i \sim f} \left[ \left( \int f(y)g(x - y)dy \right)^2 \right] - \mathbb{E}_{x_i \sim f} \left[ 2 \left( \frac{1}{n} \sum_{i=1}^n g(x - x_i) \right) \left( \int f(y)g(x - y)dy \right) \right] \\
&= \mathbb{E}_{x_i \sim f} \left[ \left( \frac{1}{n} \sum_{i=1}^n g(x - x_i) \right)^2 \right] + \left( \int f(y)g(x - y)dy \right)^2 \\
&- 2 \left( \int f(y)g(x - y)dy \right) \left( \frac{1}{n} \sum_{i=1}^n \mathbb{E}_{x_i \sim f} [g(x - x_i)] \right) \\
&= \mathbb{E}_{x_i \sim f} \left[ \left( \frac{1}{n} \sum_{i=1}^n g(x - x_i) \right)^2 \right] - \left( \int f(y)g(x - y)dy \right)^2,
\end{aligned} \tag{38}$$

1231 where the last equality comes from the fact that the expectation is over random variables  $x_1, \dots, x_n$

$$\frac{1}{n} \sum_{i=1}^n \mathbb{E}_{x_i \sim f} [g(x - x_i)] = \frac{1}{n} \sum_{i=1}^n \int g(x - y)f(y)dy = \int g(x - y)f(y)dy = f * g.$$

1232 Next, we know that

$$\begin{aligned}
& \mathbb{E}_{x_i \sim f} \left[ \left( \frac{1}{n} \sum_{i=1}^n g(x - x_i) \right)^2 \right] = \frac{1}{n^2} \mathbb{E}_{x_i \sim f} \left[ \left( \sum_{i=1}^n g(x - x_i) \right)^2 \right] \\
&= \frac{1}{n^2} \mathbb{E}_{x_i \sim f} \left[ \sum_{i=1}^n g(x - x_i)^2 \right] + \frac{1}{n^2} \mathbb{E} \left[ \sum_{i \neq j}^n g(x - x_i)g(x - x_j) \right] \\
&= \frac{1}{n^2} \sum_{i=1}^n \mathbb{E}_{x_i \sim f} [g(x - x_i)^2] + \frac{1}{n^2} \sum_{i \neq j}^n \mathbb{E}_{x_i, x_j \sim f} [g(x - x_i)g(x - x_j)] \\
&= \frac{1}{n} \mathbb{E}_{x_i \sim f} [g(x - x_i)^2] + \frac{1}{n^2} \sum_{i \neq j}^n \mathbb{E}_{x_i \sim f} [g(x - x_i)] \mathbb{E}_{x_j \sim f} [g(x - x_j)] \\
&= \frac{1}{n} \mathbb{E}_{x_i \sim f} [g(x - x_i)^2] + \left(1 - \frac{1}{n}\right) (\mathbb{E}_{x_i \sim f} [g(x - x_i)])^2 \\
&= \frac{1}{n} \mathbb{E}_{x_i \sim f} [g(x - x_i)^2] + \left(1 - \frac{1}{n}\right) \left( \int g(x - y)f(y)dy \right)^2.
\end{aligned} \tag{39}$$

1233 Putting Equations 39 and 38 together, we have

$$\begin{aligned}
& \mathbb{E}_{x_i \sim f} \left[ \left( \frac{1}{n} \sum_{i=1}^n g(x - x_i) - \int f(y)g(x - y)dy \right)^2 \right] \\
&= \frac{1}{n} \mathbb{E}_{x_i \sim f} [g(x - x_i)^2] - \frac{1}{n} \left( \int g(x - y)f(y)dy \right)^2 \\
&= \frac{1}{n} \int g(x - y)^2 f(y)dy - \frac{1}{n} \left( \int g(x - y)f(y)dy \right)^2 \\
&= \frac{1}{n} (f * g^2 - (f * g)^2).
\end{aligned} \tag{40}$$

1234 Therefore, we can rewrite Equation 37 as

$$\begin{aligned}
& \mathbb{E}_{x_i \sim f} \left[ \int_{\mathbb{R}^d} |(\mu_n * g)(x) - (f * g)(x)| dx \right] \\
&\leq 2 \int_{\mathbb{R}^d} \sqrt{\frac{1}{n} (f * g^2 - (f * g)^2)} dx \\
&\leq 2 \sqrt{\frac{1}{n}} \int_{\mathbb{R}^d} \sqrt{(f * g^2 - (f * g)^2)} dx.
\end{aligned} \tag{41}$$

1235 We know that  $g$  is the probability density function of  $\mathcal{N}(\mathbf{0}, \sigma^2 I_d)$ . Consequently, we know that

$$g(x)^2 = \frac{1}{(2\pi)^d \sigma^{2d}} \exp(-\frac{1}{\sigma^2} x^\top x) \leq \frac{1}{(2\pi\sigma^2)^d},$$

1236 and we can rewrite Equation 41 as

$$\begin{aligned}
& \mathbb{E}_{x_i \sim f} \left[ \int_{\mathbb{R}^d} |(\mu_n * g)(x) - (f * g)(x)| dx \right] \\
&\leq 2 \sqrt{\frac{1}{n}} \int_{\mathbb{R}^d} \sqrt{(f * g^2 - (f * g)^2)} dx \leq 2 \sqrt{\frac{1}{n}} \int_{\mathbb{R}^d} \sqrt{f * g^2} dx \\
&\leq 2 \sqrt{\frac{1}{n}} \int_{\mathbb{R}^d} \sqrt{\int g(x - y)^2 f(y) dy} dx \\
&= 2 \sqrt{\frac{1}{n}} \int_{\mathbb{R}^d} \sqrt{\int \frac{1}{(2\pi\sigma^2)^d} \exp\left(-\frac{1}{\sigma^2}(x - y)^\top(x - y)\right) f(y) dy} dx \\
&= 2 \sqrt{\frac{1}{n}} \int_{[-B, B]^d} \sqrt{\int \frac{1}{(2\pi\sigma^2)^d} \exp\left(-\frac{1}{\sigma^2}(x - y)^\top(x - y)\right) f(y) dy} dx \\
&\quad + 2 \sqrt{\frac{1}{n}} \int_{\mathbb{R}^d \setminus [-B, B]^d} \sqrt{\int \frac{1}{(2\pi\sigma^2)^d} \exp\left(-\frac{1}{\sigma^2}(x - y)^\top(x - y)\right) f(y) dy} dx \\
&\leq 2 \sqrt{\frac{1}{n}} \int_{[-B, B]^d} \sqrt{\int \frac{1}{(2\pi\sigma^2)^d} f(y) dy} dx \\
&\quad + 2 \sqrt{\frac{1}{n}} \int_{\mathbb{R}^d \setminus [-B, B]^d} \sqrt{\frac{1}{(2\pi\sigma^2)^d} \int \exp\left(-\frac{1}{\sigma^2}(x - y)^\top(x - y)\right) f(y) dy} dx.
\end{aligned}$$

1237 We can then conclude that

$$\begin{aligned}
& \mathbb{E}_{x_i \sim f} \left[ \int_{\mathbb{R}^d} |(\mu_n * g)(x) - (f * g)(x)| dx \right] \\
& \leq 2\sqrt{\frac{1}{n}} \int_{[-B, B]^d} \sqrt{\frac{1}{(2\pi\sigma^2)^d}} dx \\
& \quad + 2\sqrt{\frac{1}{n}} \int_{\mathbb{R}^d \setminus [-B, B]^d} \sqrt{\frac{1}{(2\pi\sigma^2)^d} \int \exp\left(-\frac{1}{\sigma^2}(x-y)^\top(x-y)\right) f(y) dy} dx \\
& \leq 2\sqrt{\frac{1}{n}} \frac{(2B)^d}{\sqrt{(2\pi\sigma^2)^d}} + 2\sqrt{\frac{1}{n}} \int_{\mathbb{R}^d \setminus [-B, B]^d} \sqrt{\frac{1}{(2\pi\sigma^2)^d} \int \exp\left(-\frac{1}{\sigma^2}(x-y)^\top(x-y)\right) dy} dx \\
& \leq 2\sqrt{\frac{1}{n}} \frac{(2B)^d}{\sqrt{(2\pi\sigma^2)^d}} + 2\sqrt{\frac{1}{n}} \int_{\mathbb{R}^d \setminus [-B, B]^d} \sqrt{\frac{1}{(2\pi\sigma^2)^d} \int \exp\left(-\frac{1}{2\sigma^2}(x-y)^\top(x-y)\right) dy} dx \\
& \leq 2\sqrt{\frac{1}{n}} \frac{(2B)^d}{\sqrt{(2\pi\sigma^2)^d}} + 2\sqrt{\frac{1}{n}} \sum_{i=1}^d \binom{d}{i} \frac{(2B)^{d-i} \sqrt{(2\pi)^i \sigma^i}}{\sqrt{(2\pi\sigma^2)^d}} \\
& \leq 2\sqrt{\frac{1}{n}} \sum_{i=0}^d \binom{d}{i} \frac{(2B)^{d-i}}{\sqrt{(2\pi\sigma^2)^{d-i}}} = 2\sqrt{\frac{1}{n}} \left( \frac{2B}{\sqrt{(2\pi\sigma^2)}} + 1 \right)^d.
\end{aligned} \tag{42}$$

1238 Here, we used the fact that for  $f$  is supported on  $[-B, B]^d$  and the maximum value of  
1239  $\exp(-(1/\sigma^2)(x-y)^\top(x-y))$  is 1 over  $[-B, B]^d$ . Moreover, for a fixed  $x$  in  $\mathbb{R}^d \setminus [-B, B]^d$ ,  
1240 the maximum value of  $\exp(-(1/\sigma^2)(x-y)^\top(x-y))$  happens when  $(x-y)^\top(x-y)$  is minimized,  
1241 therefore, Whenever  $x^{(i)} > B$ , the minimization occurs when  $y^{(i)} = B$ . On the other hand, when  
1242  $x^{(i)} < B$ , the minimization happens when  $y^{(i)} = -B$ . We can, then, consider the integration over  
1243  $\mathbb{R}^d \setminus [-B, B]^d$  as sum of integrals over subsets where for some  $i \in [d]$ ,  $|x^{(i)}| > B$ . Then we can  
1244 upper bound the integration over each subset by the marginalization of the Gaussian variable in  
1245 dimensions where  $|x^{(i)}| > B$  and consider the fact that the exponent is always smaller than the  
1246 exponent of an  $i$  dimensional Gaussian distribution in those subsets. Note that, when we use this  
1247 lemma, we consider large values of  $n$  such that the expectation of our kernel estimation can get as  
1248 small as desired. It is also noteworthy that the upper bound on the expectation implies that there  
1249 exists a set of samples  $S = \{x_1, \dots, x_n\}$  that can achieve the desired upper bound.  $\square$

1250 Lemma 55 can be used to estimate any bounded distribution that is perturbed with Gaussian noise  
1251 with a mixture of Gaussians with bounded means and equal diagonal covariance matrix. To do so, we  
1252 can first use Lemma 55 to approximate the distributions with Gaussian kernels over  $n$  i.i.d samples  
1253 from the distribution. We can then divide the subset  $[-B, B]^d$  into several subsets and define a  
1254 Gaussian on each subset that has a weight equal to the number of samples on each interval. We  
1255 provide the formal version of this estimation in the following lemma.

1256 **Lemma 56.** Let  $\bar{x} \in \overline{\mathcal{X}_{B,d}}$  be a random variable and denote its probability density function by  
1257  $f = \mathcal{D}(\bar{x})$ . Let  $g$  be the density function of a zero mean Gaussian random variable with covariance  
1258 matrix  $\sigma^2 I_d$ . Then for any small value  $\eta$ , we can estimate  $f * g$  by a mixture of  $\lceil \frac{B}{\eta} \rceil^d$  Gaussians  
1259  $\sum_{i=1}^k g(x - \mu_i)$ , where  $\mu_i \in [-B, B]^d$  and

$$d_{TV}(f * g, \sum_{i=1}^k g(x - \mu_i)) \leq \frac{18\sqrt{d}\eta}{\sigma}$$

1260 *Proof.* From Lemma 55, we know that there exists a set  $S = \{x_1, \dots, x_n\} \subset \mathbb{R}^d$  of i.i.d. samples  
1261 from  $f$  and its empirical measure  $\mu_n(x) = \frac{1\{x \in S\}}{n}$  such that the total variation between  $f$  and the  
1262 sum of Gaussian kernels defined on empirical measure is bounded

$$d_{TV}\left(f * g, \sum_{i=1}^n g(x - x_i)\right) \leq 2\sqrt{\frac{1}{n}} \left( \frac{2B}{\sqrt{(2\pi\sigma^2)}} + 1 \right)^d = \epsilon.$$

1263 Denote  $m = \lceil \frac{B}{\eta} \rceil$ . We construct the following grid  $P$  of points on  $[-B, B]^d$  and choose means of  
 1264 the Gaussian densities based on it

$$P = \{-B + 2i\eta \mid i \in [m]\}^d.$$

1265 For any  $a = (a_1, \dots, a_d) \in [m]^d$ , we define

$$\mu_a = [-B + (2a_1 + 1)\eta, \dots, -B + (2a_d + 1)\eta]^\top \in \mathbb{R}^d$$

1266 as a choice of mean vector for the Gaussian mixture. We claim that by choosing appropriate weights,  
 1267 we can estimate  $f * g$  with respect to total variation distance by a mixture of Gaussians with means in  
 1268 the following set

$$M = \left\{ \mu_a = [\mu_a^{(1)} \dots \mu_a^{(d)}]^\top \in \mathbb{R}^d \mid \mu_a^{(i)} = -B + (2a_i + 1)\eta, \forall a = (a_1, \dots, a_d) \in [m]^d \right\}.$$

1269 For the set  $S = \{x_1, \dots, x_n\}$  that was sampled for kernel estimate  $\mu_n * g$ , we choose the weight  $w_a$   
 1270 for the Gaussian density with mean  $\mu_a$  as follows. Define the set  $S_a$  as

$$S_a = \{x_i \in S \mid x_i \in [-B + 2a_1\eta, -B + 2(a_1 + 1)\eta] \times \dots \times [-B + 2a_d\eta, -B + 2(a_d + 1)\eta]\} \quad (43)$$

1271 Next, we select  $w_a$  as

$$w_a = \frac{1}{n} \sum_{i=1}^n \mathbf{1}\{x_i \in S_a\} = \frac{|S_a|}{n}.$$

1272 In other words,  $w_a$  is the number of samples in  $S$  that the  $\ell_\infty$  distance between those samples and  $\mu_a$   
 1273 is smaller than  $2\eta$ . Note that the cardinality of  $M$ , which is the number of Gaussian densities in the  
 1274 mixture is  $|M| = (\lceil \frac{B}{\eta} \rceil)^d$ .

1275 We now prove that the total variation distance between  $\mu_n * g$  and  $\sum_{a \in [m]^d} w_a g(x - \mu_a)$  is smaller  
 1276 than  $\frac{9\sqrt{d}}{\sigma} \eta$ .

$$\begin{aligned} d_{TV} & \left( \frac{1}{n} \sum_{i=1}^n g(x - x_i), \sum_{a \in [m]^d} w_a g(x - \mu_a) \right) \\ &= \frac{1}{2} \left\| \frac{1}{n} \sum_{i=1}^n g(x - x_i) - \sum_{a \in [m]^d} w_a g(x - \mu_a) \right\|_1 \\ &= \frac{1}{2} \left\| \sum_{a \in [m]^d} \left( \frac{1}{n} \sum_{x_i \in S_a} g(x - x_i) - w_a g(x - \mu_a) \right) \right\|_1 \\ &\leq \frac{1}{2} \sum_{a \in [m]^d} \left\| \left( \frac{1}{n} \sum_{x_i \in S_a} g(x - x_i) - w_a g(x - \mu_a) \right) \right\|_1 \quad (\text{By triangle inequality}). \end{aligned} \quad (44)$$

1277 Now, we can write

$$\begin{aligned} & \left\| \frac{1}{n} \sum_{x_i \in S_a} g(x - x_i) - w_a g(x - \mu_a) \right\|_1 \\ &\leq \left\| \frac{1}{n} \sum_{x_i \in S_a} (g(x - x_i) - g(x - \mu_a)) \right\|_1 \quad (\text{Since } w_a = \frac{|S_a|}{n}) \\ &\leq \frac{1}{n} \sum_{x_i \in S_a} \|g(x - x_i) - g(x - \mu_a)\|_1. \end{aligned} \quad (45)$$

1278 From Theorem 30, we know that

$$\begin{aligned} 2d_{TV}(g(x - x_i) - g(x - \mu_a)) &= \|g(x - x_i) - g(x - \mu_a)\|_1 \\ &\leq 9 \frac{\|x_i - \mu_a\|_2}{\sigma} \leq \frac{9\sqrt{d}}{\sigma} 2\eta. \end{aligned} \quad (46)$$

1279 Putting Equation 46 into Equation 45, we have

$$\begin{aligned} & \left\| \frac{1}{n} \sum_{x_i \in S_a} g(x - x_i) - w_a g(x - \mu_a) \right\|_1 \\ & \leq \frac{1}{n} \sum_{x_i \in S_a} \frac{9\sqrt{d}}{\sigma} 2\eta = w_a \frac{9\sqrt{d}}{\sigma} 2\eta. \end{aligned} \quad (47)$$

1280 Now, putting Equations 45 and 47 together, we can rewrite Equation 44 as

$$\begin{aligned} & d_{TV} \left( \frac{1}{n} \sum_{i=1}^n g(x - x_i), \sum_{a \in [m]^d} w_a g(x - \mu_a) \right) \\ & \leq \frac{1}{2} \sum_{a \in [m]^d} \left\| \left( \frac{1}{n} \sum_{x_i \in S_a} g(x - x_i) - w_a g(x - \mu_a) \right) \right\|_1 \\ & \leq \frac{1}{2} \sum_{a \in [m]^d} w_a \frac{9\sqrt{d}}{\sigma} 2\eta \\ & = \frac{9\sqrt{d}}{\sigma} \eta. \end{aligned} \quad (48)$$

1281 Note that the bound in Equation 48 does not depend on the size of sampled set  $S$ . Therefore, we can  
1282 choose  $n$  as large as we want. Specifically, we choose  $n$  as follows

$$n = \left( \frac{2B}{\sqrt{2\pi}\sigma^2} + 1 \right)^{2d} \cdot \left( \frac{9\sqrt{d}}{2\sigma} \eta \right)^{-2}$$

1283 We can then conclude that for any random variable  $\bar{x}$  defined over  $[-B, B]^d$ , we can approximate  
1284 the density function of  $\bar{x} + \bar{z}$ ,  $\bar{z} \sim \mathcal{N}(\mathbf{0}, \sigma^2 I_d)$  with a mixture of  $\lceil \frac{B}{\eta} \rceil^d$  Gaussians with means in  
1285  $[-B, B]^d$  such that

$$d_{TV} \left( f * g, \sum_{a \in [m]^d} w_a g(x - \mu_a) \right) \leq \epsilon + \frac{9\sqrt{d}}{\sigma} \eta = \frac{18\sqrt{d}\eta}{\sigma}.$$

1286

□
