# Supplementary material
Source: ML conference proceedings conference paper supplement (https://openreview.net/forum?id=rO6UExXrFzz)

## NVAC for Central Architecture

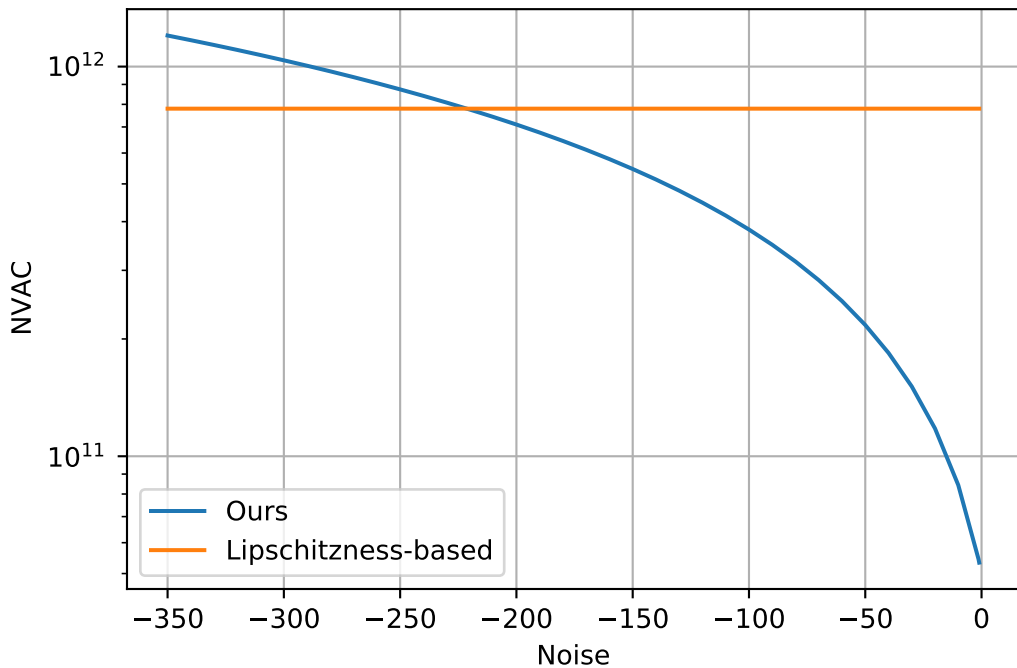

Supplement: supplementary_material [file attachment]

# NVAC vs. Width

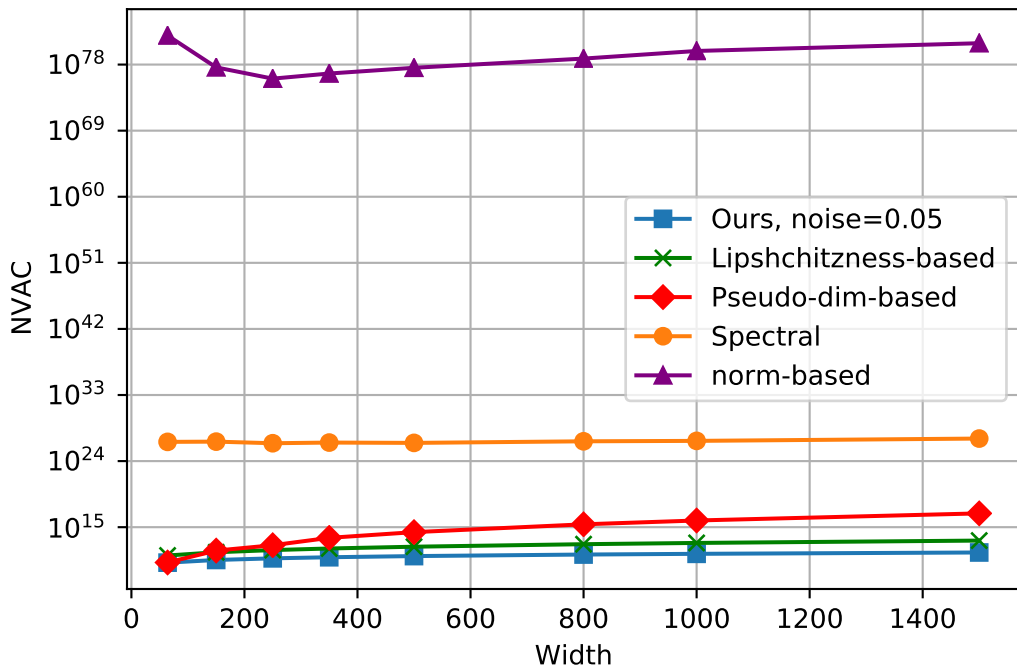

Supplement: supplementary_material [file attachment]

# NVAC vs. Depth

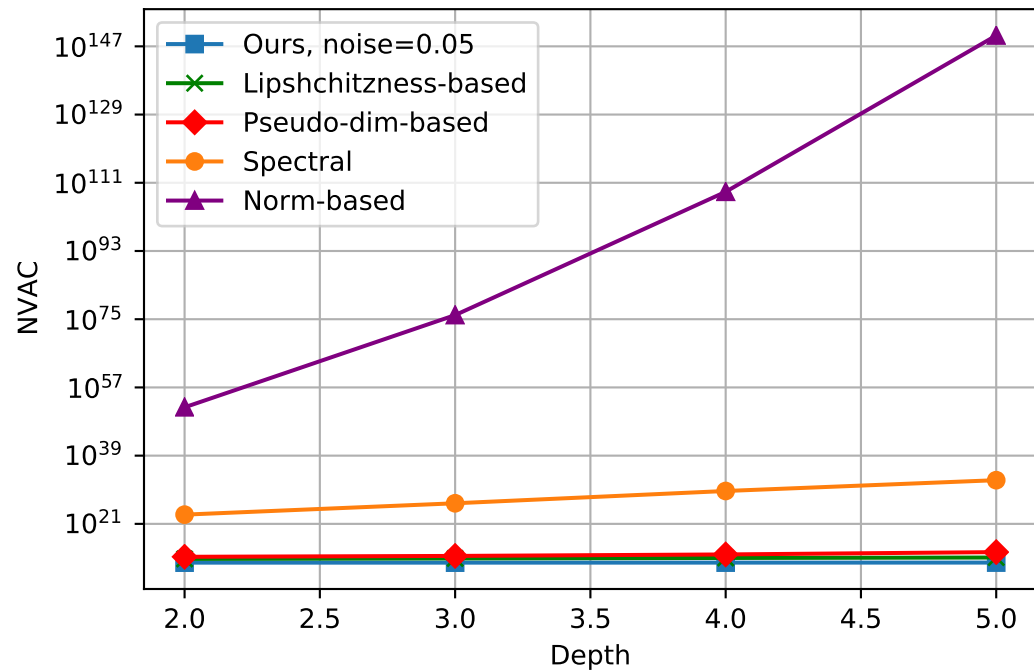

Supplement: supplementary_material [file attachment]
